# Supplementary material for: Pan-Cancer analysis and experimental validation identify the oncogenic nature of ESPL1: Potential therapeutic target in colorectal cancer
Source: Front Immunol. 2023 Mar 16;14:1138077. doi: 10.3389/fimmu.2023.1138077 (PMC10060535; doi:10.3389/fimmu.2023.1138077)
Supplement: Supplementary file 7 [file Table_2.xlsx]

## Sheet: R
	StromalScore	ImmuneScore	ESTIMATEScore
GBM	-0.476579	-0.517995	-0.513776
GBMLGG	0.229612	0.198102	0.217877
LGG	0.0401172	0.0752465	0.0653269
CESC	-0.212341	-0.245772	-0.261073
LUAD	-0.243991	-0.188774	-0.227925
COAD	-0.171154	-0.0594718	-0.124645
COADREAD	-0.146977	-0.0465489	-0.102582
LAML	0.0887217	-0.00597319	0.0433614
BRCA	-0.325639	-0.0760761	-0.204982
ESCA	-0.305017	-0.338135	-0.341213
STES	-0.507791	-0.454951	-0.51869
SARC	-0.317584	-0.316069	-0.34186
KIRP	-0.0323285	-0.0784379	-0.0555807
KIPAN	0.252651	0.292146	0.291617
STAD	-0.503395	-0.361869	-0.476362
PRAD	0.101642	0.086003	0.10637
UCEC	-0.301175	-0.39393	-0.380602
HNSC	-0.255425	-0.0548608	-0.163594
KIRC	-0.0777599	0.15861	0.0617927
LUSC	-0.394208	-0.362893	-0.399677
THYM	-0.253824	0.226799	0.0328688
LIHC	-0.210783	-0.126449	-0.175565
THCA	0.338086	0.318132	0.346321
MESO	0.111523	-0.0221522	0.0199634
READ	-0.0498017	0.0226632	-0.0193903
SKCM-M	-0.192995	-0.17111	-0.194347
SKCM	-0.212007	-0.159079	-0.190462
PAAD	-0.238791	-0.159864	-0.205599
OV	-0.137439	-0.129842	-0.14699
TGCT	-0.428666	-0.0876403	-0.252976
PCPG	-0.0216473	-0.101737	-0.062982
SKCM-P	-0.443091	-0.254126	-0.344225
UVM	-0.00559968	0.0473173	0.0249308
UCS	0.0186948	-0.177242	-0.084998
BLCA	-0.212706	-0.188044	-0.212192
ACC	-0.329723	-0.332194	-0.329802
KICH	0.0364618	-0.0492278	-0.0219252
CHOL	-0.239171	-0.119071	-0.175581
DLBC	0.125254	0.0623497	0.141536

## Sheet: FDR
	StromalScore	ImmuneScore	ESTIMATEScore
STES	1.89e-38	2.05e-30	5e-40
BRCA	1.52e-27	0.0125121	1.67e-11
STAD	7.68e-26	1.9e-13	3.39e-23
LUSC	1.58e-19	9.94e-17	8.85e-20
THCA	9.72e-15	2.71e-13	3.84e-15
KIPAN	2.98e-14	1.7e-18	1.7e-18
GBM	5.42e-10	1.94e-11	1.94e-11
GBMLGG	8.07e-09	3.14e-07	2.59e-08
HNSC	1.15e-08	0.213013	0.00028054
LUAD	9.84e-08	2.15e-05	3.87e-07
SARC	2.15e-07	2.15e-07	5.25e-08
TGCT	8.79e-07	0.31767	0.00514059
SKCM-P	1.04e-05	0.0103358	0.000635889
SKCM	1.64e-05	0.000687965	6.89e-05
BLCA	2.49e-05	0.000140871	2.49e-05
ESCA	2.98e-05	4.85e-06	4.85e-06
UCEC	4.41e-05	1.6e-07	2.4e-07
LIHC	0.000155194	0.0159285	0.00117098
CESC	0.000263907	3.36e-05	1.92e-05
SKCM-M	0.000413576	0.00129051	0.000413576
ACC	0.00340772	0.00340772	0.00340772
PAAD	0.00411087	0.0335476	0.00906769
OV	0.00739627	0.00793689	0.00739627
COAD	0.0118286	0.319665	0.0546552
COADREAD	0.0133431	0.369998	0.0715938
THYM	0.0166392	0.0202834	0.723832
PRAD	0.0355892	0.0558567	0.0355892
KIRC	0.11133	0.000759223	0.156227
LGG	0.368783	0.214582	0.214582
CHOL	0.458547	0.48914	0.458547
KIRP	0.586778	0.524753	0.524753
DLBC	0.610308	0.680604	0.610308
PCPG	0.774884	0.533529	0.607427
LAML	0.845797	0.942364	0.899289
READ	0.855244	0.855244	0.855244
MESO	0.856096	0.856096	0.856096
KICH	0.862371	0.862371	0.862371
UCS	0.891224	0.573828	0.800075
UVM	0.960937	0.960937	0.960937
