# Supplementary material for: Pan-Cancer analysis and experimental validation identify the oncogenic nature of ESPL1: Potential therapeutic target in colorectal cancer
Source: Front Immunol. 2023 Mar 16;14:1138077. doi: 10.3389/fimmu.2023.1138077 (PMC10060535; doi:10.3389/fimmu.2023.1138077)
Supplement: Supplementary file 8 [file Table_3.xlsx]

## Sheet: Sheet1
Gene Symbol	PCC
KIF18B	0.79
TIMELESS	0.77
BUB1	0.76
HJURP	0.76
KIF11	0.76
CCNF	0.75
DLGAP5	0.75
GTSE1	0.75
RACGAP1	0.75
GSG2	0.75
TICRR	0.75
SGOL1	0.74
KIF14	0.73
KIF2C	0.73
NCAPH	0.73
NUSAP1	0.73
C17orf53	0.72
CCNB2	0.72
PLK1	0.72
TTK	0.72
NCAPG	0.71
TMPO	0.71
TPX2	0.71
TROAP	0.71
ASPM	0.7
BUB1B	0.7
CCNA2	0.7
CDC25A	0.7
CDCA5	0.7
CENPA	0.7
KIF20A	0.7
KIF23	0.7
KIFC1	0.7
MKI67	0.7
OIP5	0.7
PLK4	0.7
POLQ	0.7
XRCC2	0.7
CDCA3	0.69
CENPF	0.69
DNA2	0.69
ERCC6L	0.69
EXO1	0.69
KIAA1524	0.69
LMNB1	0.69
MCM10	0.69
PIF1	0.69
RAD51	0.69
STIL	0.69
TONSL	0.69
WDR62	0.69
ARHGAP11A	0.68
CASC5	0.68
CLSPN	0.68
DTL	0.68
FANCI	0.68
FOXM1	0.68
HELLS	0.68
ORC6	0.68
SASS6	0.68
SKA1	0.68
AUNIP	0.67
CDC25C	0.67
CDT1	0.67
CENPO	0.67
FANCD2	0.67
GINS1	0.67
INCENP	0.67
KIF18A	0.67
KIF4A	0.67
MCM8	0.67
NCAPD2	0.67
ORC1	0.67
RCC2	0.67
SKA3	0.67
TRAIP	0.67
BRCA1	0.66
CHEK1	0.66
DAZAP1	0.66
EZH2	0.66
IQGAP3	0.66
KIF15	0.66
KIF20B	0.66
RFWD3	0.66
RP11-443B20.1	0.66
ZWINT	0.66
AURKB	0.65
CENPE	0.65
CKAP2L	0.65
MCM4	0.65
PARPBP	0.65
PRC1	0.65
RAD54L	0.65
RRM2	0.65
TAF5	0.65
ZWILCH	0.65
CCNB1	0.64
CENPI	0.64
MCM2	0.64
MCM5	0.64
MCM6	0.64
MYBL2	0.64
NCAPG2	0.64
NUF2	0.64
PRIM1	0.64
PTBP1	0.64
RAD51AP1	0.64
SGOL2	0.64
SRSF2	0.64
XRCC3	0.64
AURKA	0.63
C1orf112	0.63
CDCA8	0.63
DBF4	0.63
DSCC1	0.63
KNTC1	0.63
MIS18A	0.63
NDC80	0.63
POLE2	0.63
SPC25	0.63
TDP1	0.63
WDHD1	0.63
BRIP1	0.62
CDK1	0.62
CHAF1A	0.62
E2F8	0.62
EME1	0.62
ESCO2	0.62
FAM72D	0.62
HCFC1	0.62
KPNA2	0.62
MASTL	0.62
MTBP	0.62
NDC1	0.62
NEK2	0.62
SPDL1	0.62
SRSF7	0.62
UBE2T	0.62
CDC7	0.61
CENPL	0.61
DBF4B	0.61
DDX11	0.61
DDX12P	0.61
HMMR	0.61
LMNB2	0.61
MCM3	0.61
MSH6	0.61
MTFR2	0.61
RFC5	0.61
SHCBP1	0.61
TOPBP1	0.61
C16orf59	0.6
CDC45	0.6
CENPH	0.6
CEP55	0.6
DEPDC1	0.6
FAM72B	0.6
FANCA	0.6
FANCB	0.6
FBXO5	0.6
GEN1	0.6
MELK	0.6
MSH2	0.6
NEMP1	0.6
CAD	0.59
CCDC138	0.59
CDCA4	0.59
CENPK	0.59
CKAP2	0.59
DDIAS	0.59
GCN1L1	0.59
LIN9	0.59
MAD2L1	0.59
NASP	0.59
POLR2D	0.59
RP11-22B23.1	0.59
SPAG5	0.59
UBE2C	0.59
ASF1B	0.58
BIRC5	0.58
CEP85	0.58
FAM72C	0.58
FEN1	0.58
KIF24	0.58
MND1	0.58
POLA2	0.58
POLE	0.58
SENP1	0.58
SMC4	0.58
SMPD4	0.58
TRA2B	0.58
TTF2	0.58
XPO1	0.58
ZBTB39	0.58
BORA	0.57
CHAF1B	0.57
ILF3	0.57
PA2G4	0.57
PCNA	0.57
TUBB	0.57
