# Supplementary material for: Pan-Cancer analysis and experimental validation identify the oncogenic nature of ESPL1: Potential therapeutic target in colorectal cancer
Source: Front Immunol. 2023 Mar 16;14:1138077. doi: 10.3389/fimmu.2023.1138077 (PMC10060535; doi:10.3389/fimmu.2023.1138077)
Supplement: Supplementary file 9 [file Table_4.xlsx]

## Sheet: Sheet1
genes	R	p	FDR
REEP5	-0.658469	0	0
CRY2	-0.652931	0	0
NDFIP1	-0.651836	0	0
RNF180	-0.647432	0	0
VAMP2	-0.64398	0	0
CBX7	-0.641057	0	0
TK2	-0.640643	0	0
SERINC1	-0.630321	0	0
CTSO	-0.62801	0	0
ZBTB4	-0.621659	0	0
TXNDC15	-0.616878	0	0
ZBTB16	-0.612481	0	0
KBTBD3	-0.609996	0	0
KLHDC1	-0.606142	0	0
KCNAB1	-0.601364	0	0
KLF9	-0.595683	0	0
CYB5D2	-0.594606	0	0
EID1	-0.592328	0	0
PINK1	-0.587747	0	0
GABARAPL2	-0.585615	0	0
TSPAN31	-0.584352	0	0
LMBRD1	-0.582129	0	0
CASC4	-0.579984	0	0
RPS6KA2	-0.577439	0	0
SMPD1	-0.577167	0	0
PEBP4	-0.575272	0	0
CLEC3B	-0.57441	0	0
CALCOCO1	-0.57342	0	0
TMEM232	-0.573139	0	0
GNG7	-0.57248	0	0
BBS1	-0.572115	0	0
SNRPN	-0.572097	0	0
ARHGAP6	-0.570547	0	0
CIRBP	-0.570013	0	0
TNFSF12	-0.569161	0	0
UFSP2	-0.56734	0	0
ZCWPW2	-0.564315	0	0
PJA2	-0.562253	0	0
FBXL17	-0.560107	0	0
DHRS12	-0.558574	0	0
APH1B	-0.557859	0	0
BTD	-0.557757	0	0
MAGI2	-0.557227	0	0
DIXDC1	-0.55638	0	0
GPRASP2	-0.556288	0	0
FBXL5	-0.554226	0	0
AKTIP	-0.553626	0	0
GPRASP1	-0.553281	0	0
TCTA	-0.552768	0	0
SERGEF	-0.552066	0	0
CREBL2	-0.55188	0	0
LIMCH1	-0.550604	0	0
NME5	-0.550505	0	0
SHC2	-0.549983	0	0
LRRC29	-0.549853	0	0
FAM47E	-0.549786	0	0
DMRTC1B	-0.549299	0	0
CCDC159	-0.549169	0	0
TERF2IP	-0.546991	0	0
POU6F1	-0.545902	0	0
EMCN	-0.545676	0	0
PBXIP1	-0.543566	0	0
ADHFE1	-0.543134	0	0
GABARAPL1	-0.54153	0	0
PNPLA7	-0.540314	0	0
SYNE1	-0.540305	0	0
PDK4	-0.53947	0	0
MOAP1	-0.539064	0	0
TCEAL1	-0.538292	0	0
ATOH8	-0.537314	0	0
SPRYD3	-0.535988	0	0
NR3C2	-0.535959	0	0
RGN	-0.535613	0	0
KANK3	-0.534959	0	0
DLG2	-0.534226	0	0
DMGDH	-0.534042	0	0
NBEA	-0.532838	0	0
METTL7A	-0.532663	0	0
FHL1	-0.532511	0	0
CCDC85A	-0.532163	0	0
F8	-0.532055	0	0
HDHD2	-0.531934	0	0
CPE	-0.531774	0	0
LMF1	-0.531127	0	0
ARMCX3	-0.528666	0	0
CCPG1	-0.528003	0	0
PTPRN2	-0.527914	0	0
CGRRF1	-0.526013	0	0
STX12	-0.525403	0	0
C3orf18	-0.525124	0	0
ISCU	-0.524208	0	0
PDE8B	-0.52406	0	0
CAMK1	-0.523973	0	0
MAP6	-0.523828	0	0
GNPTG	-0.523132	0	0
RCAN2	-0.522875	0	0
HIGD1B	-0.522435	0	0
NKAPL	-0.522132	0	0
ST6GALNAC6	-0.520963	0	0
SCN1B	-0.520386	0	0
PTPRM	-0.520381	0	0
ZFP2	-0.52029	0	0
GABARAP	-0.520166	0	0
MXD4	-0.519961	0	0
APBB1	-0.519857	0	0
GTF2IRD2B	-0.51845	0	0
GLIPR1L2	-0.518385	0	0
RIC3	-0.51735	0	0
SORBS2	-0.517251	0	0
CLU	-0.516034	0	0
TCEAL3	-0.515289	0	0
HLF	-0.514813	0	0
FAM107A	-0.513796	0	0
PDE2A	-0.513685	0	0
ABCA8	-0.512486	0	0
NAP1L5	-0.511824	0	0
ZNF25	-0.511769	0	0
NAP1L2	-0.511239	0	0
LDB2	-0.51115	0	0
EFCAB6	-0.510802	0	0
TRIM23	-0.510697	0	0
LRP2BP	-0.509839	0	0
VPS11	-0.509429	0	0
GPM6A	-0.509402	0	0
IVD	-0.508987	0	0
DNAJB9	-0.508316	0	0
SLC22A17	-0.508079	0	0
SYPL2	-0.507766	0	0
MOCS2	-0.507368	0	0
ADD1	-0.506963	0	0
CGNL1	-0.506466	0	0
SLC4A4	-0.505958	0	0
FAM13C	-0.504856	0	0
PHF1	-0.504424	0	0
EDNRB	-0.504025	0	0
ACBD4	-0.502392	0	0
C6orf89	-0.502186	0	0
SPATA4	-0.50215	0	0
GTF2IRD2	-0.501614	0	0
ZNF483	-0.501538	0	0
ARL6IP5	-0.500765	0	0
RANBP3L	-0.500342	0	0
TNS1	-0.499482	0	0
SLC25A4	-0.499186	0	0
SEC22C	-0.49876	0	0
S1PR1	-0.498192	0	0
MORN4	-0.498088	0	0
COX7A1	-0.497934	0	0
HABP4	-0.497353	0	0
GARNL3	-0.496512	0	0
TMEM88	-0.496239	0	0
FBXO8	-0.496028	0	0
TEF	-0.495962	0	0
CRELD1	-0.495121	0	0
TSPYL1	-0.4948	0	0
TCEAL4	-0.494149	0	0
ZMAT1	-0.494076	0	0
TMEM8B	-0.49403	0	0
SCN4B	-0.493935	0	0
CYP4V2	-0.493587	0	0
ACSM5	-0.49246	0	0
LIFR	-0.491191	0	0
MAPK10	-0.490725	0	0
ATP8A1	-0.490669	0	0
GPIHBP1	-0.490602	0	0
C18orf32	-0.49048	0	0
CRYL1	-0.490134	0	0
PACRG	-0.489985	0	0
RNF146	-0.489652	0	0
PDE7B	-0.488974	0	0
EPDR1	-0.48871	0	0
KLF15	-0.488364	0	0
SLC25A42	-0.488031	0	0
SECISBP2L	-0.487571	0	0
ZDHHC15	-0.487426	0	0
ABHD14A	-0.487389	0	0
DHRS7	-0.487337	0	0
CLN5	-0.487105	0	0
SCARB2	-0.48705	0	0
FAM189A2	-0.486762	0	0
CPEB3	-0.486605	0	0
TBRG1	-0.486387	0	0
UBL3	-0.486251	0	0
ZBTB47	-0.486227	0	0
MAGEH1	-0.486058	0	0
MPDZ	-0.485549	0	0
CPEB4	-0.485433	0	0
KNDC1	-0.485304	0	0
ITM2B	-0.485279	0	0
UBXN6	-0.484924	0	0
SGSM1	-0.484852	0	0
PLCXD3	-0.484801	0	0
WBP2	-0.484772	0	0
PABPC5	-0.48382	0	0
BBS2	-0.483732	0	0
KCNK3	-0.481241	0	0
PER1	-0.480896	0	0
SLC27A1	-0.480768	0	0
CDNF	-0.480273	0	0
CASD1	-0.479791	0	0
