# Supplementary material for: Pan-Cancer analysis and experimental validation identify the oncogenic nature of ESPL1: Potential therapeutic target in colorectal cancer
Source: Front Immunol. 2023 Mar 16;14:1138077. doi: 10.3389/fimmu.2023.1138077 (PMC10060535; doi:10.3389/fimmu.2023.1138077)
Supplement: Supplementary file 10 [file Table_5.xlsx]

## Sheet: KEGG
ID	Description	GeneRatio	BgRatio	pvalue	p.adjust	qvalue	geneID	Count
hsa04137	Mitophagy - animal	5/66	61/6001	0.000510511	0.0847448	0.0838313	PINK1/GABARAPL1/GABARAPL2/GABARAP/MAPK10	5
hsa04136	Autophagy - other	3/66	27/6001	0.00307795	0.25547	0.252716	GABARAPL1/GABARAPL2/GABARAP	3
hsa04727	GABAergic synapse	4/66	77/6001	0.00990331	0.359138	0.355266	GABARAPL1/GABARAPL2/GABARAP/GNG7	4
hsa04068	FoxO signaling pathway	5/66	121/6001	0.0102927	0.359138	0.355266	GABARAPL1/GABARAPL2/GABARAP/MAPK10/S1PR1	5
hsa05032	Morphine addiction	4/66	79/6001	0.0108174	0.359138	0.355266	PDE7B/PDE8B/PDE2A/GNG7	4
hsa04977	Vitamin digestion and absorption	2/66	18/6001	0.016273	0.450219	0.445365	LMBRD1/BTD	2
hsa04926	Relaxin signaling pathway	4/66	113/6001	0.0351786	0.759627	0.751438	SHC2/MAPK10/GNG7/EDNRB	4
hsa04142	Lysosome	4/66	116/6001	0.0381849	0.759627	0.751438	SMPD1/CTSO/CLN5/SCARB2	4
hsa04710	Circadian rhythm	2/66	30/6001	0.0425304	0.759627	0.751438	PER1/CRY2	2
hsa04140	Autophagy - animal	4/66	123/6001	0.0457606	0.759627	0.751438	GABARAPL1/GABARAPL2/GABARAP/MAPK10	4
hsa04914	Progesterone-mediated oocyte maturation	3/66	77/6001	0.0522637	0.788707	0.780205	CPEB3/RPS6KA2/MAPK10	3
hsa04925	Aldosterone synthesis and secretion	3/66	84/6001	0.0645341	0.86898	0.859612	CAMK1/PDE2A/KCNK3	3
hsa04940	Type I diabetes mellitus	2/66	39/6001	0.0680526	0.86898	0.859612	PTPRN2/CPE	2
hsa04621	NOD-like receptor signaling pathway	4/66	150/6001	0.0822592	0.954625	0.944334	GABARAPL1/GABARAPL2/GABARAP/MAPK10	4
hsa00230	Purine metabolism	3/66	101/6001	0.0992077	0.954625	0.944334	PDE7B/PDE8B/PDE2A	3
hsa04071	Sphingolipid signaling pathway	3/66	108/6001	0.115287	0.954625	0.944334	SMPD1/MAPK10/S1PR1	3
hsa05415	Diabetic cardiomyopathy	4/66	172/6001	0.120038	0.954625	0.944334	MAPK10/PDK4/COX7A1/SLC25A4	4
hsa04722	Neurotrophin signaling pathway	3/66	111/6001	0.122466	0.954625	0.944334	SHC2/RPS6KA2/MAPK10	3
hsa04927	Cortisol synthesis and secretion	2/66	57/6001	0.129517	0.954625	0.944334	PDE8B/KCNK3	2
hsa00053	Ascorbate and aldarate metabolism	1/66	16/6001	0.162361	0.954625	0.944334	RGN	1
hsa04217	Necroptosis	3/66	128/6001	0.165982	0.954625	0.944334	SMPD1/MAPK10/SLC25A4	3
hsa04917	Prolactin signaling pathway	2/66	68/6001	0.171567	0.954625	0.944334	SHC2/MAPK10	2
hsa05214	Glioma	2/66	68/6001	0.171567	0.954625	0.944334	SHC2/CAMK1	2
hsa04740	Olfactory transduction	2/66	70/6001	0.179449	0.954625	0.944334	PDE2A/GNG7	2
hsa00040	Pentose and glucuronate interconversions	1/66	18/6001	0.180735	0.954625	0.944334	CRYL1	1
hsa04530	Tight junction	3/66	142/6001	0.204774	0.954625	0.944334	MPDZ/MAPK10/DLG2	3
hsa05012	Parkinson disease	4/66	215/6001	0.210682	0.954625	0.944334	PINK1/MAPK10/COX7A1/SLC25A4	4
hsa00650	Butanoate metabolism	1/66	22/6001	0.2163	0.954625	0.944334	ACSM5	1
hsa04964	Proximal tubule bicarbonate reclamation	1/66	22/6001	0.2163	0.954625	0.944334	SLC4A4	1
hsa04022	cGMP-PKG signaling pathway	3/66	147/6001	0.219122	0.954625	0.944334	PDE2A/EDNRB/SLC25A4	3
hsa04012	ErbB signaling pathway	2/66	80/6001	0.219577	0.954625	0.944334	SHC2/MAPK10	2
hsa04610	Complement and coagulation cascades	2/66	80/6001	0.219577	0.954625	0.944334	F8/CLU	2
hsa00790	Folate biosynthesis	1/66	23/6001	0.224951	0.954625	0.944334	MOCS2	1
hsa00030	Pentose phosphate pathway	1/66	24/6001	0.233508	0.954625	0.944334	RGN	1
hsa04713	Circadian entrainment	2/66	84/6001	0.235861	0.954625	0.944334	PER1/GNG7	2
hsa01522	Endocrine resistance	2/66	90/6001	0.260411	0.954625	0.944334	SHC2/MAPK10	2
hsa04215	Apoptosis - multiple species	1/66	29/6001	0.274917	0.954625	0.944334	MAPK10	1
hsa05010	Alzheimer disease	5/66	323/6001	0.281502	0.954625	0.944334	APH1B/MAPK10/COX7A1/APBB1/SLC25A4	5
hsa04130	SNARE interactions in vesicular transport	1/66	30/6001	0.28293	0.954625	0.944334	VAMP2	1
hsa04114	Oocyte meiosis	2/66	96/6001	0.285004	0.954625	0.944334	CPEB3/RPS6KA2	2
hsa04931	Insulin resistance	2/66	97/6001	0.2891	0.954625	0.944334	RPS6KA2/MAPK10	2
hsa04960	Aldosterone-regulated sodium reabsorption	1/66	35/6001	0.321706	0.954625	0.944334	NR3C2	1
hsa05208	Chemical carcinogenesis - reactive oxygen species	3/66	185/6001	0.332834	0.954625	0.944334	MAPK10/COX7A1/SLC25A4	3
hsa00600	Sphingolipid metabolism	1/66	37/6001	0.336632	0.954625	0.944334	SMPD1	1
hsa02010	ABC transporters	1/66	37/6001	0.336632	0.954625	0.944334	ABCA8	1
hsa01240	Biosynthesis of cofactors	2/66	109/6001	0.337955	0.954625	0.944334	RGN/MOCS2	2
hsa04935	Growth hormone synthesis, secretion and action	2/66	111/6001	0.346018	0.954625	0.944334	SHC2/MAPK10	2
hsa05034	Alcoholism	2/66	113/6001	0.354051	0.954625	0.944334	SHC2/GNG7	2
hsa04962	Vasopressin-regulated water reabsorption	1/66	40/6001	0.358416	0.954625	0.944334	VAMP2	1
hsa04728	Dopaminergic synapse	2/66	115/6001	0.362051	0.954625	0.944334	MAPK10/GNG7	2
hsa00240	Pyrimidine metabolism	1/66	42/6001	0.372546	0.954625	0.944334	TK2	1
hsa00280	Valine, leucine and isoleucine degradation	1/66	42/6001	0.372546	0.954625	0.944334	IVD	1
hsa04723	Retrograde endocannabinoid signaling	2/66	119/6001	0.377944	0.954625	0.944334	MAPK10/GNG7	2
hsa04930	Type II diabetes mellitus	1/66	43/6001	0.379495	0.954625	0.944334	MAPK10	1
hsa04014	Ras signaling pathway	3/66	203/6001	0.387374	0.954625	0.944334	SHC2/MAPK10/GNG7	3
hsa04910	Insulin signaling pathway	2/66	125/6001	0.401482	0.954625	0.944334	SHC2/MAPK10	2
hsa04210	Apoptosis	2/66	130/6001	0.420787	0.954625	0.944334	MAPK10/CTSO	2
hsa05135	Yersinia infection	2/66	130/6001	0.420787	0.954625	0.944334	RPS6KA2/MAPK10	2
hsa04330	Notch signaling pathway	1/66	50/6001	0.426064	0.954625	0.944334	APH1B	1
hsa04020	Calcium signaling pathway	3/66	216/6001	0.426202	0.954625	0.944334	CAMK1/EDNRB/SLC25A4	3
hsa05017	Spinocerebellar ataxia	2/66	133/6001	0.432223	0.954625	0.944334	MAPK10/SLC25A4	2
hsa04370	VEGF signaling pathway	1/66	52/6001	0.438725	0.954625	0.944334	SHC2	1
hsa04932	Non-alcoholic fatty liver disease	2/66	136/6001	0.443542	0.954625	0.944334	MAPK10/COX7A1	2
hsa05020	Prion disease	3/66	223/6001	0.446787	0.954625	0.944334	MAPK10/COX7A1/SLC25A4	3
hsa04934	Cushing syndrome	2/66	137/6001	0.447288	0.954625	0.944334	PDE8B/KCNK3	2
hsa00983	Drug metabolism - other enzymes	1/66	54/6001	0.451111	0.954625	0.944334	TK2	1
hsa04141	Protein processing in endoplasmic reticulum	2/66	146/6001	0.480374	0.954625	0.944334	UBXN6/MAPK10	2
hsa01232	Nucleotide metabolism	1/66	59/6001	0.48091	0.954625	0.944334	TK2	1
hsa04720	Long-term potentiation	1/66	61/6001	0.492378	0.954625	0.944334	RPS6KA2	1
hsa04630	JAK-STAT signaling pathway	2/66	150/6001	0.494697	0.954625	0.944334	LIFR/FHL1	2
hsa04664	Fc epsilon RI signaling pathway	1/66	62/6001	0.498019	0.954625	0.944334	MAPK10	1
hsa05133	Pertussis	1/66	64/6001	0.509115	0.954625	0.944334	MAPK10	1
hsa05120	Epithelial cell signaling in Helicobacter pylori infection	1/66	65/6001	0.514572	0.954625	0.944334	MAPK10	1
hsa04622	RIG-I-like receptor signaling pathway	1/66	66/6001	0.519969	0.954625	0.944334	MAPK10	1
hsa04920	Adipocytokine signaling pathway	1/66	66/6001	0.519969	0.954625	0.944334	MAPK10	1
hsa05221	Acute myeloid leukemia	1/66	66/6001	0.519969	0.954625	0.944334	ZBTB16	1
hsa05016	Huntington disease	3/66	250/6001	0.523259	0.954625	0.944334	MAPK10/COX7A1/SLC25A4	3
hsa04520	Adherens junction	1/66	67/6001	0.525307	0.954625	0.944334	PTPRM	1
hsa04721	Synaptic vesicle cycle	1/66	67/6001	0.525307	0.954625	0.944334	VAMP2	1
hsa04976	Bile secretion	1/66	69/6001	0.535809	0.954625	0.944334	SLC4A4	1
hsa05100	Bacterial invasion of epithelial cells	1/66	70/6001	0.540973	0.954625	0.944334	SHC2	1
hsa04260	Cardiac muscle contraction	1/66	71/6001	0.546081	0.954625	0.944334	COX7A1	1
hsa04062	Chemokine signaling pathway	2/66	168/6001	0.556048	0.954625	0.944334	SHC2/GNG7	2
hsa05220	Chronic myeloid leukemia	1/66	73/6001	0.55613	0.954625	0.944334	SHC2	1
hsa04911	Insulin secretion	1/66	75/6001	0.56596	0.954625	0.944334	VAMP2	1
hsa05212	Pancreatic cancer	1/66	75/6001	0.56596	0.954625	0.944334	MAPK10	1
hsa01521	EGFR tyrosine kinase inhibitor resistance	1/66	77/6001	0.575575	0.954625	0.944334	SHC2	1
hsa04970	Salivary secretion	1/66	77/6001	0.575575	0.954625	0.944334	VAMP2	1
hsa05167	Kaposi sarcoma-associated herpesvirus infection	2/66	175/6001	0.578479	0.954625	0.944334	MAPK10/GNG7	2
hsa04912	GnRH signaling pathway	1/66	81/6001	0.59418	0.954625	0.944334	MAPK10	1
hsa04750	Inflammatory mediator regulation of TRP channels	1/66	82/6001	0.598704	0.954625	0.944334	MAPK10	1
hsa04714	Thermogenesis	2/66	182/6001	0.600092	0.954625	0.944334	RPS6KA2/COX7A1	2
hsa04658	Th1 and Th2 cell differentiation	1/66	83/6001	0.603179	0.954625	0.944334	MAPK10	1
hsa05210	Colorectal cancer	1/66	84/6001	0.607604	0.954625	0.944334	MAPK10	1
hsa04657	IL-17 signaling pathway	1/66	85/6001	0.611981	0.954625	0.944334	MAPK10	1
hsa04916	Melanogenesis	1/66	87/6001	0.620591	0.954625	0.944334	EDNRB	1
hsa05170	Human immunodeficiency virus 1 infection	2/66	189/6001	0.620881	0.954625	0.944334	MAPK10/GNG7	2
hsa04972	Pancreatic secretion	1/66	88/6001	0.624826	0.954625	0.944334	SLC4A4	1
hsa05231	Choline metabolism in cancer	1/66	88/6001	0.624826	0.954625	0.944334	MAPK10	1
hsa04510	Focal adhesion	2/66	192/6001	0.629538	0.954625	0.944334	SHC2/MAPK10	2
hsa05022	Pathways of neurodegeneration - multiple diseases	4/66	398/6001	0.646203	0.954625	0.944334	PINK1/MAPK10/COX7A1/SLC25A4	4
hsa04620	Toll-like receptor signaling pathway	1/66	95/6001	0.653189	0.954625	0.944334	MAPK10	1
hsa04625	C-type lectin receptor signaling pathway	1/66	95/6001	0.653189	0.954625	0.944334	MAPK10	1
hsa04726	Serotonergic synapse	1/66	96/6001	0.657065	0.954625	0.944334	GNG7	1
hsa05142	Chagas disease	1/66	96/6001	0.657065	0.954625	0.944334	MAPK10	1
hsa05166	Human T-cell leukemia virus 1 infection	2/66	202/6001	0.657311	0.954625	0.944334	MAPK10/SLC25A4	2
hsa04724	Glutamatergic synapse	1/66	97/6001	0.660898	0.954625	0.944334	GNG7	1
hsa04725	Cholinergic synapse	1/66	97/6001	0.660898	0.954625	0.944334	GNG7	1
hsa04933	AGE-RAGE signaling pathway in diabetic complications	1/66	97/6001	0.660898	0.954625	0.944334	MAPK10	1
hsa04659	Th17 cell differentiation	1/66	98/6001	0.664689	0.954625	0.944334	MAPK10	1
hsa04660	T cell receptor signaling pathway	1/66	99/6001	0.668438	0.954625	0.944334	MAPK10	1
hsa01200	Carbon metabolism	1/66	102/6001	0.679439	0.954625	0.944334	RGN	1
hsa00190	Oxidative phosphorylation	1/66	103/6001	0.683025	0.954625	0.944334	COX7A1	1
hsa05145	Toxoplasmosis	1/66	103/6001	0.683025	0.954625	0.944334	MAPK10	1
hsa04668	TNF signaling pathway	1/66	105/6001	0.69008	0.954625	0.944334	MAPK10	1
hsa05132	Salmonella infection	2/66	219/6001	0.700753	0.954625	0.944334	VPS11/MAPK10	2
hsa04650	Natural killer cell mediated cytotoxicity	1/66	109/6001	0.70373	0.954625	0.944334	SHC2	1
hsa04919	Thyroid hormone signaling pathway	1/66	114/6001	0.719961	0.954625	0.944334	RCAN2	1
hsa04371	Apelin signaling pathway	1/66	116/6001	0.726205	0.954625	0.944334	GNG7	1
hsa04915	Estrogen signaling pathway	1/66	116/6001	0.726205	0.954625	0.944334	SHC2	1
hsa04380	Osteoclast differentiation	1/66	121/6001	0.741223	0.954625	0.944334	MAPK10	1
hsa04514	Cell adhesion molecules	1/66	126/6001	0.755428	0.954625	0.944334	PTPRM	1
hsa04550	Signaling pathways regulating pluripotency of stem cells	1/66	127/6001	0.758176	0.954625	0.944334	LIFR	1
hsa05418	Fluid shear stress and atherosclerosis	1/66	127/6001	0.758176	0.954625	0.944334	MAPK10	1
hsa04921	Oxytocin signaling pathway	1/66	129/6001	0.76358	0.954625	0.944334	CAMK1	1
hsa05162	Measles	1/66	129/6001	0.76358	0.954625	0.944334	MAPK10	1
hsa04150	mTOR signaling pathway	1/66	130/6001	0.766237	0.954625	0.944334	RPS6KA2	1
hsa04613	Neutrophil extracellular trap formation	1/66	130/6001	0.766237	0.954625	0.944334	SLC25A4	1
hsa04936	Alcoholic liver disease	1/66	130/6001	0.766237	0.954625	0.944334	MAPK10	1
hsa04145	Phagosome	1/66	133/6001	0.774034	0.954625	0.944334	STX12	1
hsa04261	Adrenergic signaling in cardiomyocytes	1/66	133/6001	0.774034	0.954625	0.944334	SCN1B	1
hsa05224	Breast cancer	1/66	133/6001	0.774034	0.954625	0.944334	SHC2	1
hsa04072	Phospholipase D signaling pathway	1/66	135/6001	0.779089	0.954625	0.944334	SHC2	1
hsa04390	Hippo signaling pathway	1/66	135/6001	0.779089	0.954625	0.944334	DLG2	1
hsa05226	Gastric cancer	1/66	136/6001	0.781574	0.954625	0.944334	SHC2	1
hsa04310	Wnt signaling pathway	1/66	139/6001	0.788867	0.954625	0.944334	MAPK10	1
hsa04218	Cellular senescence	1/66	141/6001	0.793595	0.954625	0.944334	SLC25A4	1
hsa05200	Pathways in cancer	4/66	486/6001	0.793604	0.954625	0.944334	ZBTB16/MAPK10/GNG7/EDNRB	4
hsa04010	MAPK signaling pathway	2/66	271/6001	0.806421	0.958262	0.947932	RPS6KA2/MAPK10	2
hsa05225	Hepatocellular carcinoma	1/66	148/6001	0.809336	0.958262	0.947932	SHC2	1
hsa05161	Hepatitis B	1/66	154/6001	0.821883	0.958262	0.947932	MAPK10	1
hsa05164	Influenza A	1/66	159/6001	0.831714	0.958262	0.947932	SLC25A4	1
hsa05152	Tuberculosis	1/66	162/6001	0.837355	0.958262	0.947932	MAPK10	1
hsa05202	Transcriptional misregulation in cancer	1/66	164/6001	0.841011	0.958262	0.947932	ZBTB16	1
hsa05014	Amyotrophic lateral sclerosis	2/66	294/6001	0.841726	0.958262	0.947932	PINK1/COX7A1	2
hsa05207	Chemical carcinogenesis - receptor activation	1/66	165/6001	0.842809	0.958262	0.947932	RPS6KA2	1
hsa05130	Pathogenic Escherichia coli infection	1/66	171/6001	0.853182	0.960537	0.950182	MAPK10	1
hsa04080	Neuroactive ligand-receptor interaction	2/66	310/6001	0.862793	0.960537	0.950182	EDNRB/S1PR1	2
hsa04151	PI3K-Akt signaling pathway	2/66	322/6001	0.876903	0.960537	0.950182	MAGI2/GNG7	2
hsa04015	Rap1 signaling pathway	1/66	191/6001	0.883124	0.960537	0.950182	MAGI2	1
hsa05169	Epstein-Barr virus infection	1/66	193/6001	0.885765	0.960537	0.950182	MAPK10	1
hsa05417	Lipid and atherosclerosis	1/66	194/6001	0.887063	0.960537	0.950182	MAPK10	1
hsa04024	cAMP signaling pathway	1/66	198/6001	0.892112	0.960537	0.950182	MAPK10	1
hsa05163	Human cytomegalovirus infection	1/66	200/6001	0.894552	0.960537	0.950182	GNG7	1
hsa05171	Coronavirus disease - COVID-19	1/66	206/6001	0.901552	0.960537	0.950182	MAPK10	1
hsa05131	Shigellosis	1/66	207/6001	0.902673	0.960537	0.950182	MAPK10	1
hsa04060	Cytokine-cytokine receptor interaction	1/66	250/6001	0.940639	0.994561	0.983839	LIFR	1
hsa05165	Human papillomavirus infection	1/66	303/6001	0.967893	1	0.98922	DLG2	1
hsa00260	Glycine, serine and threonine metabolism	0/66	33/6001	1	1	0.98922	NA	0
hsa00564	Glycerophospholipid metabolism	0/66	73/6001	1	1	0.98922	NA	0
hsa00604	Glycosphingolipid biosynthesis - ganglio series	0/66	13/6001	1	1	0.98922	NA	0
hsa03015	mRNA surveillance pathway	0/66	74/6001	1	1	0.98922	NA	0
hsa03018	RNA degradation	0/66	57/6001	1	1	0.98922	NA	0
hsa03320	PPAR signaling pathway	0/66	65/6001	1	1	0.98922	NA	0
hsa04975	Fat digestion and absorption	0/66	35/6001	1	1	0.98922	NA	0
hsa05168	Herpes simplex virus 1 infection	0/66	298/6001	1	1	0.98922	NA	0

## Sheet: BP
ID	Description	GeneRatio	BgRatio	pvalue	p.adjust	qvalue	geneID	Count
GO:0007033	vacuole organization	10/180	161/11590	0.000204052	0.390514	0.390514	PINK1/AKTIP/MOAP1/VPS11/GABARAPL1/STX12/GABARAPL2/GABARAP/CLN5/SCARB2	10
GO:0007034	vacuolar transport	8/180	121/11590	0.000586053	0.390514	0.390514	NDFIP1/UBXN6/PINK1/AKTIP/VPS11/GPRASP1/CLU/SCARB2	8
GO:0009214	cyclic nucleotide catabolic process	3/180	12/11590	0.000731004	0.390514	0.390514	PDE7B/PDE8B/PDE2A	3
GO:1901983	regulation of protein acetylation	6/180	72/11590	0.000863126	0.390514	0.390514	TERF2IP/KLF15/EID1/WBP2/CAMK1/NAP1L2	6
GO:0007041	lysosomal transport	7/180	100/11590	0.000921626	0.390514	0.390514	UBXN6/PINK1/AKTIP/VPS11/GPRASP1/CLU/SCARB2	7
GO:1904424	regulation of GTP binding	3/180	13/11590	0.000939487	0.390514	0.390514	PBXIP1/CCPG1/CLN5	3
GO:0030518	intracellular steroid hormone receptor signaling pathway	7/180	103/11590	0.00109727	0.390941	0.390941	CALCOCO1/VPS11/UFSP2/WBP2/PER1/NR3C2/CRY2	7
GO:0000045	autophagosome assembly	6/180	81/11590	0.00159846	0.498321	0.498321	PINK1/MOAP1/GABARAPL1/STX12/GABARAPL2/GABARAP	6
GO:0071383	cellular response to steroid hormone stimulus	9/180	179/11590	0.00190443	0.527737	0.527737	CALCOCO1/VPS11/UFSP2/WBP2/FAM107A/PER1/NR3C2/CRY2/KLF9	9
GO:1905037	autophagosome organization	6/180	86/11590	0.00217286	0.540434	0.540434	PINK1/MOAP1/GABARAPL1/STX12/GABARAPL2/GABARAP	6
GO:0006473	protein acetylation	9/180	185/11590	0.00238363	0.540434	0.540434	PBXIP1/TERF2IP/KLF15/EID1/WBP2/CAMK1/PER1/NAP1L2/APBB1	9
GO:0043401	steroid hormone mediated signaling pathway	7/180	120/11590	0.00264443	0.549601	0.549601	CALCOCO1/VPS11/UFSP2/WBP2/PER1/NR3C2/CRY2	7
GO:0033143	regulation of intracellular steroid hormone receptor signaling pathway	5/180	67/11590	0.0037934	0.719199	0.719199	VPS11/UFSP2/WBP2/PER1/CRY2	5
GO:0061318	renal filtration cell differentiation	3/180	22/11590	0.00456523	0.719199	0.719199	KLF15/MAGI2/EDNRB	3
GO:0072112	podocyte differentiation	3/180	22/11590	0.00456523	0.719199	0.719199	KLF15/MAGI2/EDNRB	3
GO:0035304	regulation of protein dephosphorylation	5/180	72/11590	0.00516524	0.719199	0.719199	PINK1/MAGI2/RGN/SMPD1/CRY2	5
GO:0043543	protein acylation	9/180	208/11590	0.00517121	0.719199	0.719199	PBXIP1/TERF2IP/KLF15/EID1/WBP2/CAMK1/PER1/NAP1L2/APBB1	9
GO:0072311	glomerular epithelial cell differentiation	3/180	23/11590	0.00519069	0.719199	0.719199	KLF15/MAGI2/EDNRB	3
GO:1901985	positive regulation of protein acetylation	4/180	46/11590	0.00552316	0.724987	0.724987	TERF2IP/WBP2/CAMK1/NAP1L2	4
GO:0035306	positive regulation of dephosphorylation	4/180	48/11590	0.00642984	0.772123	0.772123	PINK1/MAGI2/RGN/SMPD1	4
GO:0000422	autophagy of mitochondrion	5/180	78/11590	0.00723577	0.772123	0.772123	PINK1/GABARAPL1/GABARAPL2/GABARAP/SLC25A4	5
GO:0061726	mitochondrion disassembly	5/180	78/11590	0.00723577	0.772123	0.772123	PINK1/GABARAPL1/GABARAPL2/GABARAP/SLC25A4	5
GO:0072010	glomerular epithelium development	3/180	26/11590	0.00736541	0.772123	0.772123	KLF15/MAGI2/EDNRB	3
GO:1901016	regulation of potassium ion transmembrane transporter activity	4/180	50/11590	0.00743022	0.772123	0.772123	KCNAB1/VAMP2/KCNK3/FHL1	4
GO:1903715	regulation of aerobic respiration	3/180	27/11590	0.00819275	0.817309	0.817309	PINK1/ISCU/COX7A1	3
GO:0008333	endosome to lysosome transport	4/180	55/11590	0.0103656	0.994299	0.994299	UBXN6/AKTIP/VPS11/GPRASP1	4
GO:1901524	regulation of mitophagy	2/180	11/11590	0.0120317	1	1	PINK1/SLC25A4	2
GO:1901857	positive regulation of cellular respiration	2/180	11/11590	0.0120317	1	1	PINK1/ISCU	2
GO:0033146	regulation of intracellular estrogen receptor signaling pathway	3/180	31/11590	0.0120335	1	1	VPS11/UFSP2/WBP2	3
GO:0018394	peptidyl-lysine acetylation	7/180	163/11590	0.0136216	1	1	PBXIP1/KLF15/EID1/WBP2/PER1/NAP1L2/APBB1	7
GO:0009755	hormone-mediated signaling pathway	7/180	164/11590	0.0140483	1	1	CALCOCO1/VPS11/UFSP2/WBP2/PER1/NR3C2/CRY2	7
GO:0009154	purine ribonucleotide catabolic process	3/180	33/11590	0.0142803	1	1	PDE7B/PDE8B/PDE2A	3
GO:1901679	nucleotide transmembrane transport	2/180	12/11590	0.0142918	1	1	SLC25A42/SLC25A4	2
GO:0033144	negative regulation of intracellular steroid hormone receptor signaling pathway	3/180	34/11590	0.0154868	1	1	VPS11/PER1/CRY2	3
GO:2000756	regulation of peptidyl-lysine acetylation	4/180	63/11590	0.0164595	1	1	KLF15/EID1/WBP2/NAP1L2	4
GO:0006684	sphingomyelin metabolic process	2/180	13/11590	0.0167195	1	1	ABCA8/SMPD1	2
GO:0015867	ATP transport	2/180	13/11590	0.0167195	1	1	SLC25A42/SLC25A4	2
GO:0042921	glucocorticoid receptor signaling pathway	2/180	13/11590	0.0167195	1	1	PER1/CRY2	2
GO:0006195	purine nucleotide catabolic process	3/180	36/11590	0.0180673	1	1	PDE7B/PDE8B/PDE2A	3
GO:0035307	positive regulation of protein dephosphorylation	3/180	36/11590	0.0180673	1	1	PINK1/MAGI2/SMPD1	3
GO:0043966	histone H3 acetylation	4/180	66/11590	0.0192185	1	1	PBXIP1/WBP2/PER1/NAP1L2	4
GO:0055072	iron ion homeostasis	4/180	66/11590	0.0192185	1	1	NDFIP1/SLC22A17/FBXL5/ISCU	4
GO:0031958	corticosteroid receptor signaling pathway	2/180	14/11590	0.0193091	1	1	PER1/CRY2	2
GO:1902259	regulation of delayed rectifier potassium channel activity	2/180	14/11590	0.0193091	1	1	KCNAB1/VAMP2	2
GO:0009187	cyclic nucleotide metabolic process	3/180	37/11590	0.0194418	1	1	PDE7B/PDE8B/PDE2A	3
GO:0007005	mitochondrion organization	12/180	394/11590	0.0199736	1	1	PINK1/MOAP1/VPS11/HIGD1B/ARMCX3/GABARAPL1/GABARAPL2/GABARAP/PDE2A/COX7A1/CLU/SLC25A4	12
GO:0032409	regulation of transporter activity	8/180	220/11590	0.0215046	1	1	NDFIP1/PINK1/RGN/KCNAB1/VAMP2/SCN1B/KCNK3/FHL1	8
GO:0051895	negative regulation of focal adhesion assembly	2/180	15/11590	0.0220549	1	1	FAM107A/ARHGAP6	2
GO:0150118	negative regulation of cell-substrate junction organization	2/180	15/11590	0.0220549	1	1	FAM107A/ARHGAP6	2
GO:0035303	regulation of dephosphorylation	5/180	103/11590	0.022061	1	1	PINK1/MAGI2/RGN/SMPD1/CRY2	5
GO:0009261	ribonucleotide catabolic process	3/180	39/11590	0.0223595	1	1	PDE7B/PDE8B/PDE2A	3
GO:0043457	regulation of cellular respiration	3/180	40/11590	0.0239029	1	1	PINK1/ISCU/COX7A1	3
GO:1901379	regulation of potassium ion transmembrane transport	4/180	71/11590	0.0244199	1	1	KCNAB1/VAMP2/KCNK3/FHL1	4
GO:0060295	regulation of cilium movement involved in cell motility	2/180	16/11590	0.0249517	1	1	RGN/BBS1	2
GO:1902019	regulation of cilium-dependent cell motility	2/180	16/11590	0.0249517	1	1	RGN/BBS1	2
GO:0008631	intrinsic apoptotic signaling pathway in response to oxidative stress	3/180	41/11590	0.0255026	1	1	PINK1/ARL6IP5/NME5	3
GO:0044088	regulation of vacuole organization	3/180	41/11590	0.0255026	1	1	PINK1/MOAP1/SCARB2	3
GO:0072523	purine-containing compound catabolic process	3/180	41/11590	0.0255026	1	1	PDE7B/PDE8B/PDE2A	3
GO:0061462	protein localization to lysosome	3/180	43/11590	0.0288708	1	1	LMBRD1/CLU/SCARB2	3
GO:0016573	histone acetylation	6/180	150/11590	0.029492	1	1	PBXIP1/EID1/WBP2/PER1/NAP1L2/APBB1	6
GO:0010823	negative regulation of mitochondrion organization	3/180	44/11590	0.0306389	1	1	PINK1/CLU/SLC25A4	3
GO:0061028	establishment of endothelial barrier	3/180	44/11590	0.0306389	1	1	PDE2A/EDNRB/ADD1	3
GO:0090199	regulation of release of cytochrome c from mitochondria	3/180	44/11590	0.0306389	1	1	PINK1/MOAP1/CLU	3
GO:0002082	regulation of oxidative phosphorylation	2/180	18/11590	0.0311769	1	1	PINK1/COX7A1	2
GO:0044154	histone H3-K14 acetylation	2/180	18/11590	0.0311769	1	1	WBP2/NAP1L2	2
GO:1902176	negative regulation of oxidative stress-induced intrinsic apoptotic signaling pathway	2/180	18/11590	0.0311769	1	1	PINK1/NME5	2
GO:0016236	macroautophagy	8/180	238/11590	0.0323231	1	1	UBXN6/PINK1/MOAP1/GABARAPL1/STX12/GABARAPL2/GABARAP/SLC25A4	8
GO:0030520	intracellular estrogen receptor signaling pathway	3/180	45/11590	0.0324629	1	1	VPS11/UFSP2/WBP2	3
GO:0043666	regulation of phosphoprotein phosphatase activity	3/180	45/11590	0.0324629	1	1	MAGI2/RGN/CRY2	3
GO:0006885	regulation of pH	4/180	78/11590	0.0330077	1	1	SLC4A4/PDK4/EDNRB/CLN5	4
GO:0006470	protein dephosphorylation	7/180	196/11590	0.0332659	1	1	PINK1/MAGI2/RGN/SMPD1/PTPRN2/PTPRM/CRY2	7
GO:0018393	internal peptidyl-lysine acetylation	6/180	155/11590	0.0338463	1	1	PBXIP1/EID1/WBP2/PER1/NAP1L2/APBB1	6
GO:0035850	epithelial cell differentiation involved in kidney development	3/180	46/11590	0.0343424	1	1	KLF15/MAGI2/EDNRB	3
GO:0035493	SNARE complex assembly	2/180	19/11590	0.0344951	1	1	VPS11/VAMP2	2
GO:0051503	adenine nucleotide transport	2/180	19/11590	0.0344951	1	1	SLC25A42/SLC25A4	2
GO:1903008	organelle disassembly	5/180	117/11590	0.0355931	1	1	PINK1/GABARAPL1/GABARAPL2/GABARAP/SLC25A4	5
GO:0032412	regulation of ion transmembrane transporter activity	7/180	199/11590	0.0356777	1	1	PINK1/RGN/KCNAB1/VAMP2/SCN1B/KCNK3/FHL1	7
GO:0006475	internal protein amino acid acetylation	6/180	157/11590	0.0356987	1	1	PBXIP1/EID1/WBP2/PER1/NAP1L2/APBB1	6
GO:0006879	cellular iron ion homeostasis	3/180	47/11590	0.0362772	1	1	NDFIP1/SLC22A17/ISCU	3
GO:0010639	negative regulation of organelle organization	9/180	289/11590	0.0364764	1	1	KANK3/PINK1/TERF2IP/RPS6KA2/S1PR1/CLU/ARHGAP6/SLC25A4/ADD1	9
GO:0015865	purine nucleotide transport	2/180	20/11590	0.0379437	1	1	SLC25A42/SLC25A4	2
GO:0015868	purine ribonucleotide transport	2/180	20/11590	0.0379437	1	1	SLC25A42/SLC25A4	2
GO:0032515	negative regulation of phosphoprotein phosphatase activity	2/180	20/11590	0.0379437	1	1	RGN/CRY2	2
GO:0046058	cAMP metabolic process	2/180	20/11590	0.0379437	1	1	PDE7B/PDE8B	2
GO:0072530	purine-containing compound transmembrane transport	2/180	20/11590	0.0379437	1	1	SLC25A42/SLC25A4	2
GO:0003352	regulation of cilium movement	2/180	21/11590	0.041518	1	1	RGN/BBS1	2
GO:0022898	regulation of transmembrane transporter activity	7/180	207/11590	0.0426679	1	1	PINK1/RGN/KCNAB1/VAMP2/SCN1B/KCNK3/FHL1	7
GO:0048545	response to steroid hormone	9/180	299/11590	0.0437172	1	1	CALCOCO1/VPS11/UFSP2/WBP2/FAM107A/PER1/NR3C2/CRY2/KLF9	9
GO:0001836	release of cytochrome c from mitochondria	3/180	51/11590	0.0445631	1	1	PINK1/MOAP1/CLU	3
GO:0031058	positive regulation of histone modification	4/180	86/11590	0.0447313	1	1	PINK1/WBP2/PHF1/NAP1L2	4
GO:0043266	regulation of potassium ion transport	4/180	86/11590	0.0447313	1	1	KCNAB1/VAMP2/KCNK3/FHL1	4
GO:0010821	regulation of mitochondrion organization	5/180	125/11590	0.0452098	1	1	PINK1/MOAP1/PDE2A/CLU/SLC25A4	5
GO:0043153	entrainment of circadian clock by photoperiod	2/180	22/11590	0.0452133	1	1	PER1/CRY2	2
GO:0051497	negative regulation of stress fiber assembly	2/180	22/11590	0.0452133	1	1	S1PR1/ARHGAP6	2
GO:0006862	nucleotide transport	2/180	23/11590	0.049025	1	1	SLC25A42/SLC25A4	2
GO:0017145	stem cell division	2/180	23/11590	0.049025	1	1	ZBTB16/NAP1L2	2
GO:0021591	ventricular system development	2/180	23/11590	0.049025	1	1	NME5/BBS1	2
GO:0008637	apoptotic mitochondrial changes	4/180	89/11590	0.0496558	1	1	PINK1/MOAP1/CLU/SLC25A4	4
GO:0031398	positive regulation of protein ubiquitination	4/180	89/11590	0.0496558	1	1	NDFIP1/PINK1/GABARAP/FAM107A	4
GO:0061005	cell differentiation involved in kidney development	3/180	54/11590	0.0513404	1	1	KLF15/MAGI2/EDNRB	3
GO:0003081	regulation of systemic arterial blood pressure by renin-angiotensin	2/180	24/11590	0.0529486	1	1	RPS6KA2/EDNRB	2
GO:0032232	negative regulation of actin filament bundle assembly	2/180	24/11590	0.0529486	1	1	S1PR1/ARHGAP6	2
GO:1902904	negative regulation of supramolecular fiber organization	5/180	131/11590	0.0533491	1	1	KANK3/S1PR1/CLU/ARHGAP6/ADD1	5
GO:0034250	positive regulation of cellular amide metabolic process	5/180	132/11590	0.0547834	1	1	PINK1/HABP4/CPEB3/CLU/CIRBP	5
GO:0033138	positive regulation of peptidyl-serine phosphorylation	4/180	92/11590	0.0548671	1	1	PINK1/TERF2IP/CAMK1/CREBL2	4
GO:0035065	regulation of histone acetylation	3/180	56/11590	0.0561199	1	1	EID1/WBP2/NAP1L2	3
GO:0006622	protein targeting to lysosome	2/180	25/11590	0.0569798	1	1	CLU/SCARB2	2
GO:0050685	positive regulation of mRNA processing	2/180	25/11590	0.0569798	1	1	CPEB3/CIRBP	2
GO:0051017	actin filament bundle assembly	5/180	134/11590	0.0577187	1	1	LIMCH1/FAM107A/S1PR1/ARHGAP6/ADD1	5
GO:0061572	actin filament bundle organization	5/180	135/11590	0.0592197	1	1	LIMCH1/FAM107A/S1PR1/ARHGAP6/ADD1	5
GO:0001885	endothelial cell development	3/180	58/11590	0.0611033	1	1	PDE2A/EDNRB/ADD1	3
GO:0009166	nucleotide catabolic process	3/180	58/11590	0.0611033	1	1	PDE7B/PDE8B/PDE2A	3
GO:0016239	positive regulation of macroautophagy	3/180	58/11590	0.0611033	1	1	PINK1/MOAP1/SLC25A4	3
GO:0009648	photoperiodism	2/180	26/11590	0.0611143	1	1	PER1/CRY2	2
GO:0090200	positive regulation of release of cytochrome c from mitochondria	2/180	26/11590	0.0611143	1	1	PINK1/MOAP1	2
GO:1901889	negative regulation of cell junction assembly	2/180	26/11590	0.0611143	1	1	FAM107A/ARHGAP6	2
GO:0051893	regulation of focal adhesion assembly	3/180	59/11590	0.0636702	1	1	LIMCH1/FAM107A/ARHGAP6	3
GO:0090109	regulation of cell-substrate junction assembly	3/180	59/11590	0.0636702	1	1	LIMCH1/FAM107A/ARHGAP6	3
GO:0009649	entrainment of circadian clock	2/180	27/11590	0.0653481	1	1	PER1/CRY2	2
GO:0010922	positive regulation of phosphatase activity	2/180	27/11590	0.0653481	1	1	MAGI2/RGN	2
GO:0010923	negative regulation of phosphatase activity	2/180	27/11590	0.0653481	1	1	RGN/CRY2	2
GO:1902175	regulation of oxidative stress-induced intrinsic apoptotic signaling pathway	2/180	27/11590	0.0653481	1	1	PINK1/NME5	2
GO:1903955	positive regulation of protein targeting to mitochondrion	2/180	27/11590	0.0653481	1	1	PINK1/VPS11	2
GO:0045446	endothelial cell differentiation	4/180	98/11590	0.0661408	1	1	PDE2A/EDNRB/S1PR1/ADD1	4
GO:0072665	protein localization to vacuole	3/180	61/11590	0.0689511	1	1	LMBRD1/CLU/SCARB2	3
GO:0035308	negative regulation of protein dephosphorylation	2/180	28/11590	0.0696769	1	1	RGN/CRY2	2
GO:0072528	pyrimidine-containing compound biosynthetic process	2/180	28/11590	0.0696769	1	1	NME5/TK2	2
GO:0030522	intracellular receptor signaling pathway	7/180	232/11590	0.0699782	1	1	CALCOCO1/VPS11/UFSP2/WBP2/PER1/NR3C2/CRY2	7
GO:0010822	positive regulation of mitochondrion organization	3/180	62/11590	0.071664	1	1	PINK1/MOAP1/SLC25A4	3
GO:0031056	regulation of histone modification	5/180	143/11590	0.0720242	1	1	PINK1/EID1/WBP2/PHF1/NAP1L2	5
GO:0015748	organophosphate ester transport	4/180	101/11590	0.0721963	1	1	SLC25A42/ATP8A1/SCARB2/SLC25A4	4
GO:0033120	positive regulation of RNA splicing	2/180	29/11590	0.074097	1	1	HABP4/CIRBP	2
GO:0010921	regulation of phosphatase activity	3/180	63/11590	0.0744242	1	1	MAGI2/RGN/CRY2	3
GO:0019646	aerobic electron transport chain	3/180	64/11590	0.0772312	1	1	PINK1/ISCU/COX7A1	3
GO:0032835	glomerulus development	3/180	64/11590	0.0772312	1	1	KLF15/MAGI2/EDNRB	3
GO:0150116	regulation of cell-substrate junction organization	3/180	64/11590	0.0772312	1	1	LIMCH1/FAM107A/ARHGAP6	3
GO:0000423	mitophagy	2/180	30/11590	0.0786045	1	1	PINK1/SLC25A4	2
GO:0007616	long-term memory	2/180	30/11590	0.0786045	1	1	CPEB3/PJA2	2
GO:0036475	neuron death in response to oxidative stress	2/180	30/11590	0.0786045	1	1	PINK1/ARL6IP5	2
GO:0046329	negative regulation of JNK cascade	2/180	30/11590	0.0786045	1	1	PINK1/PER1	2
GO:0060999	positive regulation of dendritic spine development	2/180	30/11590	0.0786045	1	1	CPEB3/CAMK1	2
GO:0097345	mitochondrial outer membrane permeabilization	2/180	30/11590	0.0786045	1	1	MOAP1/SLC25A4	2
GO:1903580	positive regulation of ATP metabolic process	2/180	30/11590	0.0786045	1	1	PINK1/SLC4A4	2
GO:0007254	JNK cascade	5/180	147/11590	0.0789533	1	1	DIXDC1/PINK1/PJA2/MAPK10/PER1	5
GO:1901292	nucleoside phosphate catabolic process	3/180	65/11590	0.0800842	1	1	PDE7B/PDE8B/PDE2A	3
GO:0055076	transition metal ion homeostasis	4/180	105/11590	0.0806947	1	1	NDFIP1/SLC22A17/FBXL5/ISCU	4
GO:1903322	positive regulation of protein modification by small protein conjugation or removal	4/180	105/11590	0.0806947	1	1	NDFIP1/PINK1/GABARAP/FAM107A	4
GO:0001953	negative regulation of cell-matrix adhesion	2/180	31/11590	0.0831956	1	1	FAM107A/ARHGAP6	2
GO:0030808	regulation of nucleotide biosynthetic process	2/180	31/11590	0.0831956	1	1	PINK1/PDK4	2
GO:0043001	Golgi to plasma membrane protein transport	2/180	31/11590	0.0831956	1	1	VAMP2/BBS1	2
GO:0045910	negative regulation of DNA recombination	2/180	31/11590	0.0831956	1	1	NDFIP1/TERF2IP	2
GO:1900371	regulation of purine nucleotide biosynthetic process	2/180	31/11590	0.0831956	1	1	PINK1/PDK4	2
GO:1903749	positive regulation of establishment of protein localization to mitochondrion	2/180	31/11590	0.0831956	1	1	PINK1/VPS11	2
GO:0042982	amyloid precursor protein metabolic process	3/180	67/11590	0.0859256	1	1	APH1B/ITM2B/CLU	3
GO:0061912	selective autophagy	3/180	67/11590	0.0859256	1	1	PINK1/GABARAPL1/SLC25A4	3
GO:1904062	regulation of cation transmembrane transport	8/180	293/11590	0.0865198	1	1	PINK1/ISCU/RGN/KCNAB1/VAMP2/SCN1B/KCNK3/FHL1	8
GO:0046326	positive regulation of glucose import	2/180	32/11590	0.0878667	1	1	KLF15/CREBL2	2
GO:0060632	regulation of microtubule-based movement	2/180	32/11590	0.0878667	1	1	RGN/BBS1	2
GO:1902110	positive regulation of mitochondrial membrane permeability involved in apoptotic process	2/180	32/11590	0.0878667	1	1	MOAP1/SLC25A4	2
GO:0007032	endosome organization	3/180	68/11590	0.0889126	1	1	AKTIP/VPS11/SCARB2	3
GO:1902807	negative regulation of cell cycle G1/S phase transition	3/180	68/11590	0.0889126	1	1	FAM107A/FHL1/APBB1	3
GO:0051050	positive regulation of transport	17/180	770/11590	0.0899548	1	1	PINK1/VPS11/KLF15/ATP8A1/ABCA8/MAGI2/RGN/CAMK1/VAMP2/SMPD1/SCN1B/KCNK3/FHL1/EDNRB/CREBL2/CLU/APBB1	17
GO:0009896	positive regulation of catabolic process	10/180	397/11590	0.0904624	1	1	NDFIP1/PINK1/MOAP1/VPS11/FBXL5/CPEB3/GABARAP/SLC4A4/CLU/SLC25A4	10
GO:0043467	regulation of generation of precursor metabolites and energy	4/180	110/11590	0.0919814	1	1	PINK1/ISCU/SLC4A4/COX7A1	4
GO:0045727	positive regulation of translation	4/180	110/11590	0.0919814	1	1	PINK1/HABP4/CPEB3/CIRBP	4
GO:0019934	cGMP-mediated signaling	2/180	33/11590	0.0926142	1	1	PDE2A/EDNRB	2
GO:0035066	positive regulation of histone acetylation	2/180	33/11590	0.0926142	1	1	WBP2/NAP1L2	2
GO:0045022	early endosome to late endosome transport	2/180	33/11590	0.0926142	1	1	AKTIP/VPS11	2
GO:0009150	purine ribonucleotide metabolic process	9/180	349/11590	0.0941076	1	1	PINK1/ACSM5/PDE7B/SLC4A4/PDE8B/NME5/PDK4/PDE2A/DLG2	9
GO:0034762	regulation of transmembrane transport	11/180	454/11590	0.0962179	1	1	PINK1/KLF15/ISCU/ARL6IP5/RGN/KCNAB1/VAMP2/SCN1B/KCNK3/FHL1/CREBL2	11
GO:0006623	protein targeting to vacuole	2/180	34/11590	0.0974347	1	1	CLU/SCARB2	2
GO:1902686	mitochondrial outer membrane permeabilization involved in programmed cell death	2/180	34/11590	0.0974347	1	1	MOAP1/SLC25A4	2
GO:1903146	regulation of autophagy of mitochondrion	2/180	34/11590	0.0974347	1	1	PINK1/SLC25A4	2
GO:1903573	negative regulation of response to endoplasmic reticulum stress	2/180	34/11590	0.0974347	1	1	DNAJB9/CLU	2
GO:0042773	ATP synthesis coupled electron transport	3/180	71/11590	0.09813	1	1	PINK1/ISCU/COX7A1	3
GO:0042775	mitochondrial ATP synthesis coupled electron transport	3/180	71/11590	0.09813	1	1	PINK1/ISCU/COX7A1	3
GO:0003158	endothelium development	4/180	113/11590	0.0990964	1	1	PDE2A/EDNRB/S1PR1/ADD1	4
GO:0051403	stress-activated MAPK cascade	6/180	205/11590	0.100116	1	1	DIXDC1/PINK1/ARL6IP5/PJA2/MAPK10/PER1	6
GO:0003254	regulation of membrane depolarization	2/180	35/11590	0.102325	1	1	SCN1B/FHL1	2
GO:1902108	regulation of mitochondrial membrane permeability involved in apoptotic process	2/180	35/11590	0.102325	1	1	MOAP1/SLC25A4	2
GO:2000785	regulation of autophagosome assembly	2/180	35/11590	0.102325	1	1	PINK1/MOAP1	2
GO:0045124	regulation of bone resorption	2/180	36/11590	0.107281	1	1	PDK4/S1PR1	2
GO:0098927	vesicle-mediated transport between endosomal compartments	2/180	36/11590	0.107281	1	1	AKTIP/VPS11	2
GO:1900744	regulation of p38MAPK cascade	2/180	36/11590	0.107281	1	1	PJA2/PER1	2
GO:1903214	regulation of protein targeting to mitochondrion	2/180	36/11590	0.107281	1	1	PINK1/VPS11	2
GO:0007040	lysosome organization	3/180	74/11590	0.107717	1	1	AKTIP/CLN5/SCARB2	3
GO:0080171	lytic vacuole organization	3/180	74/11590	0.107717	1	1	AKTIP/CLN5/SCARB2	3
GO:0031098	stress-activated protein kinase signaling cascade	6/180	211/11590	0.110862	1	1	DIXDC1/PINK1/ARL6IP5/PJA2/MAPK10/PER1	6
GO:0034766	negative regulation of ion transmembrane transport	3/180	75/11590	0.110991	1	1	ISCU/ARL6IP5/KCNAB1	3
GO:0045732	positive regulation of protein catabolic process	5/180	164/11590	0.112187	1	1	NDFIP1/VPS11/FBXL5/GABARAP/CLU	5
GO:0001990	regulation of systemic arterial blood pressure by hormone	2/180	37/11590	0.1123	1	1	RPS6KA2/EDNRB	2
GO:0006120	mitochondrial electron transport, NADH to ubiquinone	2/180	37/11590	0.1123	1	1	PINK1/ISCU	2
GO:0006414	translational elongation	2/180	37/11590	0.1123	1	1	CPEB3/SECISBP2L	2
GO:0035305	negative regulation of dephosphorylation	2/180	37/11590	0.1123	1	1	RGN/CRY2	2
GO:0035794	positive regulation of mitochondrial membrane permeability	2/180	37/11590	0.1123	1	1	MOAP1/SLC25A4	2
GO:0044275	cellular carbohydrate catabolic process	2/180	37/11590	0.1123	1	1	GABARAPL1/SCARB2	2
GO:0072595	maintenance of protein localization in organelle	2/180	37/11590	0.1123	1	1	PINK1/SYNE1	2
GO:0046328	regulation of JNK cascade	4/180	119/11590	0.114065	1	1	DIXDC1/PINK1/PJA2/PER1	4
GO:0046434	organophosphate catabolic process	4/180	119/11590	0.114065	1	1	PDE7B/PDE8B/SMPD1/PDE2A	4
GO:0032872	regulation of stress-activated MAPK cascade	5/180	165/11590	0.114325	1	1	DIXDC1/PINK1/ARL6IP5/PJA2/PER1	5
GO:0009259	ribonucleotide metabolic process	9/180	365/11590	0.115402	1	1	PINK1/ACSM5/PDE7B/SLC4A4/PDE8B/NME5/PDK4/PDE2A/DLG2	9
GO:0033135	regulation of peptidyl-serine phosphorylation	4/180	120/11590	0.116652	1	1	PINK1/TERF2IP/CAMK1/CREBL2	4
GO:0032781	positive regulation of ATP-dependent activity	2/180	38/11590	0.11738	1	1	GABARAPL2/RGN	2
GO:0042551	neuron maturation	2/180	38/11590	0.11738	1	1	EDNRB/CLN5	2
GO:2000758	positive regulation of peptidyl-lysine acetylation	2/180	38/11590	0.11738	1	1	WBP2/NAP1L2	2
GO:0019935	cyclic-nucleotide-mediated signaling	3/180	77/11590	0.117652	1	1	PDE7B/PDE2A/EDNRB	3
GO:0048041	focal adhesion assembly	3/180	77/11590	0.117652	1	1	LIMCH1/FAM107A/ARHGAP6	3
GO:1900542	regulation of purine nucleotide metabolic process	3/180	77/11590	0.117652	1	1	PINK1/SLC4A4/PDK4	3
GO:0070302	regulation of stress-activated protein kinase signaling cascade	5/180	168/11590	0.120857	1	1	DIXDC1/PINK1/ARL6IP5/PJA2/PER1	5
GO:0030301	cholesterol transport	3/180	78/11590	0.121038	1	1	STX12/ABCA8/CLU	3
GO:0010828	positive regulation of glucose transmembrane transport	2/180	39/11590	0.122516	1	1	KLF15/CREBL2	2
GO:0042304	regulation of fatty acid biosynthetic process	2/180	39/11590	0.122516	1	1	RGN/PDK4	2
GO:0043268	positive regulation of potassium ion transport	2/180	39/11590	0.122516	1	1	KCNK3/FHL1	2
GO:0045981	positive regulation of nucleotide metabolic process	2/180	39/11590	0.122516	1	1	PINK1/SLC4A4	2
GO:1900544	positive regulation of purine nucleotide metabolic process	2/180	39/11590	0.122516	1	1	PINK1/SLC4A4	2
GO:0006163	purine nucleotide metabolic process	9/180	371/11590	0.124025	1	1	PINK1/ACSM5/PDE7B/SLC4A4/PDE8B/NME5/PDK4/PDE2A/DLG2	9
GO:0006914	autophagy	10/180	424/11590	0.124324	1	1	UBXN6/PINK1/MOAP1/VPS11/GABARAPL1/STX12/GABARAPL2/GABARAP/CLU/SLC25A4	10
GO:0061919	process utilizing autophagic mechanism	10/180	424/11590	0.124324	1	1	UBXN6/PINK1/MOAP1/VPS11/GABARAPL1/STX12/GABARAPL2/GABARAP/CLU/SLC25A4	10
GO:0016311	dephosphorylation	7/180	269/11590	0.125933	1	1	PINK1/MAGI2/RGN/SMPD1/PTPRN2/PTPRM/CRY2	7
GO:0019693	ribose phosphate metabolic process	9/180	373/11590	0.126975	1	1	PINK1/ACSM5/PDE7B/SLC4A4/PDE8B/NME5/PDK4/PDE2A/DLG2	9
GO:0006953	acute-phase response	2/180	40/11590	0.127706	1	1	F8/EDNRB	2
GO:0072583	clathrin-dependent endocytosis	2/180	40/11590	0.127706	1	1	LMBRD1/MAGI2	2
GO:0036473	cell death in response to oxidative stress	3/180	80/11590	0.127916	1	1	PINK1/ARL6IP5/NME5	3
GO:0006140	regulation of nucleotide metabolic process	3/180	81/11590	0.131406	1	1	PINK1/SLC4A4/PDK4	3
GO:0045807	positive regulation of endocytosis	3/180	81/11590	0.131406	1	1	MAGI2/SMPD1/CLU	3
GO:0051492	regulation of stress fiber assembly	3/180	81/11590	0.131406	1	1	LIMCH1/S1PR1/ARHGAP6	3
GO:0032873	negative regulation of stress-activated MAPK cascade	2/180	41/11590	0.132947	1	1	PINK1/PER1	2
GO:0034205	amyloid-beta formation	2/180	41/11590	0.132947	1	1	APH1B/CLU	2
GO:0070303	negative regulation of stress-activated protein kinase signaling cascade	2/180	41/11590	0.132947	1	1	PINK1/PER1	2
GO:1905710	positive regulation of membrane permeability	2/180	41/11590	0.132947	1	1	MOAP1/SLC25A4	2
GO:0010959	regulation of metal ion transport	8/180	325/11590	0.133752	1	1	ISCU/RGN/KCNAB1/VAMP2/SCN1B/PER1/KCNK3/FHL1	8
GO:0071496	cellular response to external stimulus	7/180	275/11590	0.136689	1	1	GABARAPL1/HABP4/GABARAPL2/GABARAP/FAM107A/PDK4/PDE2A	7
GO:0046850	regulation of bone remodeling	2/180	42/11590	0.138237	1	1	PDK4/S1PR1	2
GO:1903202	negative regulation of oxidative stress-induced cell death	2/180	42/11590	0.138237	1	1	PINK1/NME5	2
GO:1903747	regulation of establishment of protein localization to mitochondrion	2/180	42/11590	0.138237	1	1	PINK1/VPS11	2
GO:0051494	negative regulation of cytoskeleton organization	4/180	128/11590	0.138246	1	1	KANK3/S1PR1/ARHGAP6/ADD1	4
GO:0046916	cellular transition metal ion homeostasis	3/180	83/11590	0.138486	1	1	NDFIP1/SLC22A17/ISCU	3
GO:0071407	cellular response to organic cyclic compound	11/180	489/11590	0.139679	1	1	CALCOCO1/VPS11/UFSP2/WBP2/FAM107A/ARL6IP5/PER1/PDE2A/NR3C2/CRY2/KLF9	11
GO:0034765	regulation of ion transmembrane transport	9/180	382/11590	0.140711	1	1	PINK1/ISCU/ARL6IP5/RGN/KCNAB1/VAMP2/SCN1B/KCNK3/FHL1	9
GO:2001243	negative regulation of intrinsic apoptotic signaling pathway	3/180	84/11590	0.142075	1	1	PINK1/NME5/CLU	3
GO:1903050	regulation of proteolysis involved in protein catabolic process	5/180	178/11590	0.143848	1	1	PINK1/GABARAPL2/GABARAP/RGN/CLU	5
GO:0001660	fever generation	1/180	10/11590	0.144942	1	1	EDNRB	1
GO:0009209	pyrimidine ribonucleoside triphosphate biosynthetic process	1/180	10/11590	0.144942	1	1	NME5	1
GO:0010561	negative regulation of glycoprotein biosynthetic process	1/180	10/11590	0.144942	1	1	ITM2B	1
GO:0010992	ubiquitin recycling	1/180	10/11590	0.144942	1	1	PINK1	1
GO:0030322	stabilization of membrane potential	1/180	10/11590	0.144942	1	1	KCNK3	1
GO:0031650	regulation of heat generation	1/180	10/11590	0.144942	1	1	EDNRB	1
GO:0031848	protection from non-homologous end joining at telomere	1/180	10/11590	0.144942	1	1	TERF2IP	1
GO:0032353	negative regulation of hormone biosynthetic process	1/180	10/11590	0.144942	1	1	PDE8B	1
GO:0033148	positive regulation of intracellular estrogen receptor signaling pathway	1/180	10/11590	0.144942	1	1	WBP2	1
GO:0033539	fatty acid beta-oxidation using acyl-CoA dehydrogenase	1/180	10/11590	0.144942	1	1	IVD	1
GO:0034058	endosomal vesicle fusion	1/180	10/11590	0.144942	1	1	VPS11	1
GO:0034135	regulation of toll-like receptor 2 signaling pathway	1/180	10/11590	0.144942	1	1	PJA2	1
GO:0035933	glucocorticoid secretion	1/180	10/11590	0.144942	1	1	CRY2	1
GO:0042045	epithelial fluid transport	1/180	10/11590	0.144942	1	1	EDNRB	1
GO:0042754	negative regulation of circadian rhythm	1/180	10/11590	0.144942	1	1	CRY2	1
GO:0042762	regulation of sulfur metabolic process	1/180	10/11590	0.144942	1	1	PDK4	1
GO:0046642	negative regulation of alpha-beta T cell proliferation	1/180	10/11590	0.144942	1	1	NDFIP1	1
GO:0048484	enteric nervous system development	1/180	10/11590	0.144942	1	1	EDNRB	1
GO:0060213	positive regulation of nuclear-transcribed mRNA poly(A) tail shortening	1/180	10/11590	0.144942	1	1	CPEB3	1
GO:1900363	regulation of mRNA polyadenylation	1/180	10/11590	0.144942	1	1	CPEB3	1
GO:1901029	negative regulation of mitochondrial outer membrane permeabilization involved in apoptotic signaling pathway	1/180	10/11590	0.144942	1	1	SLC25A4	1
GO:1901678	iron coordination entity transport	1/180	10/11590	0.144942	1	1	SLC22A17	1
GO:1903817	negative regulation of voltage-gated potassium channel activity	1/180	10/11590	0.144942	1	1	KCNAB1	1
GO:1905383	protein localization to presynapse	1/180	10/11590	0.144942	1	1	DLG2	1
GO:0018205	peptidyl-lysine modification	8/180	332/11590	0.145566	1	1	PBXIP1/KLF15/EID1/WBP2/PHF1/PER1/NAP1L2/APBB1	8
GO:0022904	respiratory electron transport chain	3/180	85/11590	0.145694	1	1	PINK1/ISCU/COX7A1	3
GO:0006826	iron ion transport	2/180	44/11590	0.148949	1	1	SLC22A17/ISCU	2
GO:0006893	Golgi to plasma membrane transport	2/180	44/11590	0.148949	1	1	VAMP2/BBS1	2
GO:0009116	nucleoside metabolic process	2/180	44/11590	0.148949	1	1	NME5/TK2	2
GO:0033344	cholesterol efflux	2/180	44/11590	0.148949	1	1	STX12/ABCA8	2
GO:0048260	positive regulation of receptor-mediated endocytosis	2/180	44/11590	0.148949	1	1	MAGI2/CLU	2
GO:0060998	regulation of dendritic spine development	2/180	44/11590	0.148949	1	1	CPEB3/CAMK1	2
GO:0050886	endocrine process	3/180	86/11590	0.149343	1	1	RPS6KA2/EDNRB/CRY2	3
GO:0030041	actin filament polymerization	4/180	132/11590	0.149606	1	1	KANK3/FAM107A/ARHGAP6/ADD1	4
GO:0016567	protein ubiquitination	12/180	553/11590	0.152085	1	1	RNF146/NDFIP1/PINK1/AKTIP/VPS11/SERGEF/FBXL5/GABARAP/FAM107A/PJA2/ZBTB16/TRIM23	12
GO:0007044	cell-substrate junction assembly	3/180	87/11590	0.153022	1	1	LIMCH1/FAM107A/ARHGAP6	3
GO:0072666	establishment of protein localization to vacuole	2/180	45/11590	0.154367	1	1	CLU/SCARB2	2
GO:0010976	positive regulation of neuron projection development	4/180	134/11590	0.155418	1	1	MAGI2/CAMK1/SCN1B/SCARB2	4
GO:0007006	mitochondrial membrane organization	3/180	88/11590	0.156729	1	1	PINK1/MOAP1/SLC25A4	3
GO:0002638	negative regulation of immunoglobulin production	1/180	11/11590	0.158233	1	1	NDFIP1	1
GO:0006086	acetyl-CoA biosynthetic process from pyruvate	1/180	11/11590	0.158233	1	1	PDK4	1
GO:0007494	midgut development	1/180	11/11590	0.158233	1	1	EDNRB	1
GO:0009163	nucleoside biosynthetic process	1/180	11/11590	0.158233	1	1	TK2	1
GO:0033145	positive regulation of intracellular steroid hormone receptor signaling pathway	1/180	11/11590	0.158233	1	1	WBP2	1
GO:0034404	nucleobase-containing small molecule biosynthetic process	1/180	11/11590	0.158233	1	1	TK2	1
GO:0035542	regulation of SNARE complex assembly	1/180	11/11590	0.158233	1	1	VPS11	1
GO:0038180	nerve growth factor signaling pathway	1/180	11/11590	0.158233	1	1	MAGI2	1
GO:0042407	cristae formation	1/180	11/11590	0.158233	1	1	PINK1	1
GO:0043084	penile erection	1/180	11/11590	0.158233	1	1	EDNRB	1
GO:0043471	regulation of cellular carbohydrate catabolic process	1/180	11/11590	0.158233	1	1	SCARB2	1
GO:0043951	negative regulation of cAMP-mediated signaling	1/180	11/11590	0.158233	1	1	PDE2A	1
GO:0045815	epigenetic maintenance of chromatin in transcription-competent conformation	1/180	11/11590	0.158233	1	1	WBP2	1
GO:0046036	CTP metabolic process	1/180	11/11590	0.158233	1	1	NME5	1
GO:0060211	regulation of nuclear-transcribed mRNA poly(A) tail shortening	1/180	11/11590	0.158233	1	1	CPEB3	1
GO:0061158	3'-UTR-mediated mRNA destabilization	1/180	11/11590	0.158233	1	1	CPEB3	1
GO:0098840	protein transport along microtubule	1/180	11/11590	0.158233	1	1	DLG2	1
GO:0099118	microtubule-based protein transport	1/180	11/11590	0.158233	1	1	DLG2	1
GO:1900272	negative regulation of long-term synaptic potentiation	1/180	11/11590	0.158233	1	1	FAM107A	1
GO:1901298	regulation of hydrogen peroxide-mediated programmed cell death	1/180	11/11590	0.158233	1	1	PINK1	1
GO:1901317	regulation of flagellated sperm motility	1/180	11/11590	0.158233	1	1	RGN	1
GO:1902902	negative regulation of autophagosome assembly	1/180	11/11590	0.158233	1	1	PINK1	1
GO:1902947	regulation of tau-protein kinase activity	1/180	11/11590	0.158233	1	1	CLU	1
GO:1903818	positive regulation of voltage-gated potassium channel activity	1/180	11/11590	0.158233	1	1	KCNK3	1
GO:2000615	regulation of histone H3-K9 acetylation	1/180	11/11590	0.158233	1	1	NAP1L2	1
GO:2001171	positive regulation of ATP biosynthetic process	1/180	11/11590	0.158233	1	1	PINK1	1
GO:2001257	regulation of cation channel activity	4/180	135/11590	0.158355	1	1	PINK1/KCNAB1/VAMP2/KCNK3	4
GO:0003044	regulation of systemic arterial blood pressure mediated by a chemical signal	2/180	46/11590	0.159823	1	1	RPS6KA2/EDNRB	2
GO:0019933	cAMP-mediated signaling	2/180	46/11590	0.159823	1	1	PDE7B/PDE2A	2
GO:0043113	receptor clustering	2/180	46/11590	0.159823	1	1	MAGI2/DLG2	2
GO:0046902	regulation of mitochondrial membrane permeability	2/180	46/11590	0.159823	1	1	MOAP1/SLC25A4	2
GO:0071385	cellular response to glucocorticoid stimulus	2/180	46/11590	0.159823	1	1	FAM107A/KLF9	2
GO:0032414	positive regulation of ion transmembrane transporter activity	3/180	89/11590	0.160464	1	1	PINK1/RGN/KCNK3	3
GO:0110020	regulation of actomyosin structure organization	3/180	89/11590	0.160464	1	1	LIMCH1/S1PR1/ARHGAP6	3
GO:0072521	purine-containing compound metabolic process	9/180	395/11590	0.161841	1	1	PINK1/ACSM5/PDE7B/SLC4A4/PDE8B/NME5/PDK4/PDE2A/DLG2	9
GO:0042176	regulation of protein catabolic process	7/180	289/11590	0.163462	1	1	NDFIP1/PINK1/VPS11/FBXL5/GABARAPL2/GABARAP/CLU	7
GO:0032870	cellular response to hormone stimulus	11/180	506/11590	0.164058	1	1	CALCOCO1/VPS11/UFSP2/WBP2/FAM107A/VAMP2/PER1/PDK4/NR3C2/CRY2/KLF9	11
GO:0015918	sterol transport	3/180	90/11590	0.164226	1	1	STX12/ABCA8/CLU	3
GO:0009267	cellular response to starvation	4/180	137/11590	0.164291	1	1	GABARAPL1/GABARAPL2/GABARAP/PDK4	4
GO:0051603	proteolysis involved in protein catabolic process	12/180	562/11590	0.164601	1	1	RNF146/NDFIP1/UBXN6/PINK1/SERGEF/FBXL5/GABARAPL2/GABARAP/RGN/DNAJB9/CTSO/CLU	12
GO:0016055	Wnt signaling pathway	8/180	343/11590	0.165133	1	1	DIXDC1/RNF146/CALCOCO1/PBXIP1/KLF15/MAGI2/EDNRB/CPE	8
GO:0061951	establishment of protein localization to plasma membrane	2/180	47/11590	0.165314	1	1	VAMP2/BBS1	2
GO:0198738	cell-cell signaling by wnt	8/180	344/11590	0.16697	1	1	DIXDC1/RNF146/CALCOCO1/PBXIP1/KLF15/MAGI2/EDNRB/CPE	8
GO:0071396	cellular response to lipid	11/180	508/11590	0.167059	1	1	CALCOCO1/VPS11/UFSP2/WBP2/FAM107A/PER1/PDK4/NR3C2/EDNRB/CRY2/KLF9	11
GO:0032956	regulation of actin cytoskeleton organization	7/180	291/11590	0.167469	1	1	KANK3/DIXDC1/LIMCH1/FAM107A/S1PR1/ARHGAP6/ADD1	7
GO:0031669	cellular response to nutrient levels	5/180	188/11590	0.168574	1	1	GABARAPL1/GABARAPL2/GABARAP/FAM107A/PDK4	5
GO:0090316	positive regulation of intracellular protein transport	4/180	139/11590	0.170307	1	1	PINK1/VPS11/CAMK1/VAMP2	4
GO:0038066	p38MAPK cascade	2/180	48/11590	0.170838	1	1	PJA2/PER1	2
GO:0003096	renal sodium ion transport	1/180	12/11590	0.171319	1	1	EDNRB	1
GO:0003376	sphingosine-1-phosphate receptor signaling pathway	1/180	12/11590	0.171319	1	1	S1PR1	1
GO:0009208	pyrimidine ribonucleoside triphosphate metabolic process	1/180	12/11590	0.171319	1	1	NME5	1
GO:0010310	regulation of hydrogen peroxide metabolic process	1/180	12/11590	0.171319	1	1	PINK1	1
GO:0010866	regulation of triglyceride biosynthetic process	1/180	12/11590	0.171319	1	1	RGN	1
GO:0032351	negative regulation of hormone metabolic process	1/180	12/11590	0.171319	1	1	PDE8B	1
GO:0035815	positive regulation of renal sodium excretion	1/180	12/11590	0.171319	1	1	EDNRB	1
GO:0042983	amyloid precursor protein biosynthetic process	1/180	12/11590	0.171319	1	1	ITM2B	1
GO:0042984	regulation of amyloid precursor protein biosynthetic process	1/180	12/11590	0.171319	1	1	ITM2B	1
GO:0043970	histone H3-K9 acetylation	1/180	12/11590	0.171319	1	1	NAP1L2	1
GO:0046598	positive regulation of viral entry into host cell	1/180	12/11590	0.171319	1	1	SMPD1	1
GO:0070932	histone H3 deacetylation	1/180	12/11590	0.171319	1	1	PER1	1
GO:0071391	cellular response to estrogen stimulus	1/180	12/11590	0.171319	1	1	WBP2	1
GO:0072015	podocyte development	1/180	12/11590	0.171319	1	1	MAGI2	1
GO:0075294	positive regulation by symbiont of entry into host	1/180	12/11590	0.171319	1	1	SMPD1	1
GO:0090158	endoplasmic reticulum membrane organization	1/180	12/11590	0.171319	1	1	REEP5	1
GO:1900102	negative regulation of endoplasmic reticulum unfolded protein response	1/180	12/11590	0.171319	1	1	DNAJB9	1
GO:1901659	glycosyl compound biosynthetic process	1/180	12/11590	0.171319	1	1	TK2	1
GO:1903599	positive regulation of autophagy of mitochondrion	1/180	12/11590	0.171319	1	1	SLC25A4	1
GO:1903624	regulation of DNA catabolic process	1/180	12/11590	0.171319	1	1	RGN	1
GO:1903651	positive regulation of cytoplasmic transport	1/180	12/11590	0.171319	1	1	VPS11	1
GO:1904925	positive regulation of autophagy of mitochondrion in response to mitochondrial depolarization	1/180	12/11590	0.171319	1	1	PINK1	1
GO:1905907	negative regulation of amyloid fibril formation	1/180	12/11590	0.171319	1	1	CLU	1
GO:2001140	positive regulation of phospholipid transport	1/180	12/11590	0.171319	1	1	ATP8A1	1
GO:0003341	cilium movement	3/180	92/11590	0.171828	1	1	RGN/NME5/BBS1	3
GO:0032231	regulation of actin filament bundle assembly	3/180	92/11590	0.171828	1	1	LIMCH1/S1PR1/ARHGAP6	3
GO:0006812	cation transport	18/180	911/11590	0.173128	1	1	SLC25A42/NDFIP1/PINK1/SLC22A17/ISCU/ATP8A1/RGN/SLC4A4/KCNAB1/VAMP2/SCN1B/PER1/KCNK3/GPM6A/FHL1/EDNRB/COX7A1/SLC25A4	18
GO:0055067	monovalent inorganic cation homeostasis	4/180	140/11590	0.173344	1	1	SLC4A4/PDK4/EDNRB/CLN5	4
GO:0150115	cell-substrate junction organization	3/180	93/11590	0.175667	1	1	LIMCH1/FAM107A/ARHGAP6	3
GO:0006767	water-soluble vitamin metabolic process	2/180	49/11590	0.176392	1	1	RGN/BTD	2
GO:0030837	negative regulation of actin filament polymerization	2/180	49/11590	0.176392	1	1	KANK3/ADD1	2
GO:0046324	regulation of glucose import	2/180	49/11590	0.176392	1	1	KLF15/CREBL2	2
GO:0098930	axonal transport	2/180	49/11590	0.176392	1	1	ARMCX3/DLG2	2
GO:0046890	regulation of lipid biosynthetic process	4/180	141/11590	0.176399	1	1	RGN/PDE8B/PDK4/CREBL2	4
GO:0006906	vesicle fusion	3/180	94/11590	0.17953	1	1	VPS11/STX12/VAMP2	3
GO:0009117	nucleotide metabolic process	10/180	461/11590	0.180482	1	1	PINK1/ACSM5/PDE7B/SLC4A4/PDE8B/NME5/TK2/PDK4/PDE2A/DLG2	10
GO:0000768	syncytium formation by plasma membrane fusion	2/180	50/11590	0.181975	1	1	CAMK1/TCTA	2
GO:0045428	regulation of nitric oxide biosynthetic process	2/180	50/11590	0.181975	1	1	RGN/CLU	2
GO:0050435	amyloid-beta metabolic process	2/180	50/11590	0.181975	1	1	APH1B/CLU	2
GO:0140253	cell-cell fusion	2/180	50/11590	0.181975	1	1	CAMK1/TCTA	2
GO:0006839	mitochondrial transport	4/180	143/11590	0.182566	1	1	PINK1/MOAP1/VPS11/SLC25A4	4
GO:0030038	contractile actin filament bundle assembly	3/180	95/11590	0.183416	1	1	LIMCH1/S1PR1/ARHGAP6	3
GO:0043149	stress fiber assembly	3/180	95/11590	0.183416	1	1	LIMCH1/S1PR1/ARHGAP6	3
GO:0001976	nervous system process involved in regulation of systemic arterial blood pressure	1/180	13/11590	0.184202	1	1	RPS6KA2	1
GO:0002829	negative regulation of type 2 immune response	1/180	13/11590	0.184202	1	1	NDFIP1	1
GO:0005980	glycogen catabolic process	1/180	13/11590	0.184202	1	1	GABARAPL1	1
GO:0006063	uronic acid metabolic process	1/180	13/11590	0.184202	1	1	CRYL1	1
GO:0006448	regulation of translational elongation	1/180	13/11590	0.184202	1	1	CPEB3	1
GO:0008356	asymmetric cell division	1/180	13/11590	0.184202	1	1	ZBTB16	1
GO:0009148	pyrimidine nucleoside triphosphate biosynthetic process	1/180	13/11590	0.184202	1	1	NME5	1
GO:0010421	hydrogen peroxide-mediated programmed cell death	1/180	13/11590	0.184202	1	1	PINK1	1
GO:0010752	regulation of cGMP-mediated signaling	1/180	13/11590	0.184202	1	1	PDE2A	1
GO:0019585	glucuronate metabolic process	1/180	13/11590	0.184202	1	1	CRYL1	1
GO:0032341	aldosterone metabolic process	1/180	13/11590	0.184202	1	1	EDNRB	1
GO:0032510	endosome to lysosome transport via multivesicular body sorting pathway	1/180	13/11590	0.184202	1	1	UBXN6	1
GO:0033147	negative regulation of intracellular estrogen receptor signaling pathway	1/180	13/11590	0.184202	1	1	VPS11	1
GO:0033605	positive regulation of catecholamine secretion	1/180	13/11590	0.184202	1	1	PINK1	1
GO:0035810	positive regulation of urine volume	1/180	13/11590	0.184202	1	1	EDNRB	1
GO:0035865	cellular response to potassium ion	1/180	13/11590	0.184202	1	1	DLG2	1
GO:0036006	cellular response to macrophage colony-stimulating factor stimulus	1/180	13/11590	0.184202	1	1	PDE2A	1
GO:0045019	negative regulation of nitric oxide biosynthetic process	1/180	13/11590	0.184202	1	1	RGN	1
GO:0048302	regulation of isotype switching to IgG isotypes	1/180	13/11590	0.184202	1	1	NDFIP1	1
GO:0051447	negative regulation of meiotic cell cycle	1/180	13/11590	0.184202	1	1	RPS6KA2	1
GO:0051481	negative regulation of cytosolic calcium ion concentration	1/180	13/11590	0.184202	1	1	KCNK3	1
GO:0060546	negative regulation of necroptotic process	1/180	13/11590	0.184202	1	1	SLC25A4	1
GO:0072310	glomerular epithelial cell development	1/180	13/11590	0.184202	1	1	MAGI2	1
GO:0097468	programmed cell death in response to reactive oxygen species	1/180	13/11590	0.184202	1	1	PINK1	1
GO:1900037	regulation of cellular response to hypoxia	1/180	13/11590	0.184202	1	1	PINK1	1
GO:1903019	negative regulation of glycoprotein metabolic process	1/180	13/11590	0.184202	1	1	ITM2B	1
GO:1903894	regulation of IRE1-mediated unfolded protein response	1/180	13/11590	0.184202	1	1	DNAJB9	1
GO:1904406	negative regulation of nitric oxide metabolic process	1/180	13/11590	0.184202	1	1	RGN	1
GO:1904923	regulation of autophagy of mitochondrion in response to mitochondrial depolarization	1/180	13/11590	0.184202	1	1	PINK1	1
GO:2001138	regulation of phospholipid transport	1/180	13/11590	0.184202	1	1	ATP8A1	1
GO:0034763	negative regulation of transmembrane transport	3/180	96/11590	0.187324	1	1	ISCU/ARL6IP5/KCNAB1	3
GO:0090174	organelle membrane fusion	3/180	96/11590	0.187324	1	1	VPS11/STX12/VAMP2	3
GO:0043470	regulation of carbohydrate catabolic process	2/180	51/11590	0.187583	1	1	SLC4A4/SCARB2	2
GO:0080164	regulation of nitric oxide metabolic process	2/180	51/11590	0.187583	1	1	RGN/CLU	2
GO:0032886	regulation of microtubule-based process	5/180	196/11590	0.189474	1	1	DIXDC1/FAM107A/RGN/MPDZ/BBS1	5
GO:0006753	nucleoside phosphate metabolic process	10/180	467/11590	0.190565	1	1	PINK1/ACSM5/PDE7B/SLC4A4/PDE8B/NME5/TK2/PDK4/PDE2A/DLG2	10
GO:0072655	establishment of protein localization to mitochondrion	3/180	97/11590	0.191254	1	1	PINK1/MOAP1/VPS11	3
GO:0071695	anatomical structure maturation	5/180	197/11590	0.192151	1	1	ZBTB16/RPS6KA2/EDNRB/S1PR1/CLN5	5
GO:0042987	amyloid precursor protein catabolic process	2/180	52/11590	0.193216	1	1	APH1B/CLU	2
GO:0048278	vesicle docking	2/180	52/11590	0.193216	1	1	VPS11/STX12	2
GO:0098655	cation transmembrane transport	14/180	696/11590	0.193625	1	1	PINK1/ISCU/ATP8A1/RGN/SLC4A4/KCNAB1/VAMP2/SCN1B/KCNK3/GPM6A/FHL1/EDNRB/COX7A1/SLC25A4	14
GO:0034248	regulation of cellular amide metabolic process	8/180	358/11590	0.193656	1	1	PINK1/HABP4/CPEB3/SECISBP2L/PER1/PDK4/CLU/CIRBP	8
GO:0034764	positive regulation of transmembrane transport	5/180	198/11590	0.194841	1	1	PINK1/KLF15/RGN/KCNK3/CREBL2	5
GO:0003214	cardiac left ventricle morphogenesis	1/180	14/11590	0.196886	1	1	CPE	1
GO:0007635	chemosensory behavior	1/180	14/11590	0.196886	1	1	BBS1	1
GO:0008212	mineralocorticoid metabolic process	1/180	14/11590	0.196886	1	1	EDNRB	1
GO:0009251	glucan catabolic process	1/180	14/11590	0.196886	1	1	GABARAPL1	1
GO:0030202	heparin metabolic process	1/180	14/11590	0.196886	1	1	EDNRB	1
GO:0030575	nuclear body organization	1/180	14/11590	0.196886	1	1	HABP4	1
GO:0031649	heat generation	1/180	14/11590	0.196886	1	1	EDNRB	1
GO:0034134	toll-like receptor 2 signaling pathway	1/180	14/11590	0.196886	1	1	PJA2	1
GO:0035795	negative regulation of mitochondrial membrane permeability	1/180	14/11590	0.196886	1	1	SLC25A4	1
GO:0048291	isotype switching to IgG isotypes	1/180	14/11590	0.196886	1	1	NDFIP1	1
GO:0051956	negative regulation of amino acid transport	1/180	14/11590	0.196886	1	1	ARL6IP5	1
GO:0061684	chaperone-mediated autophagy	1/180	14/11590	0.196886	1	1	CLU	1
GO:0062099	negative regulation of programmed necrotic cell death	1/180	14/11590	0.196886	1	1	SLC25A4	1
GO:0070734	histone H3-K27 methylation	1/180	14/11590	0.196886	1	1	PHF1	1
GO:0090083	regulation of inclusion body assembly	1/180	14/11590	0.196886	1	1	CLU	1
GO:0090520	sphingolipid mediated signaling pathway	1/180	14/11590	0.196886	1	1	S1PR1	1
GO:1901032	negative regulation of response to reactive oxygen species	1/180	14/11590	0.196886	1	1	PINK1	1
GO:1903206	negative regulation of hydrogen peroxide-induced cell death	1/180	14/11590	0.196886	1	1	PINK1	1
GO:1905906	regulation of amyloid fibril formation	1/180	14/11590	0.196886	1	1	CLU	1
GO:2000641	regulation of early endosome to late endosome transport	1/180	14/11590	0.196886	1	1	VPS11	1
GO:0006949	syncytium formation	2/180	53/11590	0.19887	1	1	CAMK1/TCTA	2
GO:0045600	positive regulation of fat cell differentiation	2/180	53/11590	0.19887	1	1	ZBTB16/CREBL2	2
GO:0070936	protein K48-linked ubiquitination	2/180	53/11590	0.19887	1	1	RNF146/GABARAP	2
GO:0032411	positive regulation of transporter activity	3/180	99/11590	0.199176	1	1	PINK1/RGN/KCNK3	3
GO:0072009	nephron epithelium development	3/180	99/11590	0.199176	1	1	KLF15/MAGI2/EDNRB	3
GO:0031401	positive regulation of protein modification process	16/180	822/11590	0.2074	1	1	NDFIP1/PINK1/AKTIP/TERF2IP/WBP2/LIMCH1/GABARAP/FAM107A/MAGI2/CAMK1/SMPD1/PHF1/NAP1L2/EDNRB/CREBL2/CLU	16
GO:0002713	negative regulation of B cell mediated immunity	1/180	15/11590	0.209374	1	1	NDFIP1	1
GO:0002890	negative regulation of immunoglobulin mediated immune response	1/180	15/11590	0.209374	1	1	NDFIP1	1
GO:0010958	regulation of amino acid import across plasma membrane	1/180	15/11590	0.209374	1	1	ARL6IP5	1
GO:0021756	striatum development	1/180	15/11590	0.209374	1	1	BBS1	1
GO:0021846	cell proliferation in forebrain	1/180	15/11590	0.209374	1	1	DIXDC1	1
GO:0036376	sodium ion export across plasma membrane	1/180	15/11590	0.209374	1	1	SLC4A4	1
GO:0043691	reverse cholesterol transport	1/180	15/11590	0.209374	1	1	CLU	1
GO:0044247	cellular polysaccharide catabolic process	1/180	15/11590	0.209374	1	1	GABARAPL1	1
GO:0090208	positive regulation of triglyceride metabolic process	1/180	15/11590	0.209374	1	1	RGN	1
GO:1901550	regulation of endothelial cell development	1/180	15/11590	0.209374	1	1	ADD1	1
GO:1902916	positive regulation of protein polyubiquitination	1/180	15/11590	0.209374	1	1	GABARAP	1
GO:1903140	regulation of establishment of endothelial barrier	1/180	15/11590	0.209374	1	1	ADD1	1
GO:1903789	regulation of amino acid transmembrane transport	1/180	15/11590	0.209374	1	1	ARL6IP5	1
GO:2000786	positive regulation of autophagosome assembly	1/180	15/11590	0.209374	1	1	MOAP1	1
GO:2000846	regulation of corticosteroid hormone secretion	1/180	15/11590	0.209374	1	1	CRY2	1
GO:2001169	regulation of ATP biosynthetic process	1/180	15/11590	0.209374	1	1	PINK1	1
GO:0010812	negative regulation of cell-substrate adhesion	2/180	55/11590	0.210237	1	1	FAM107A/ARHGAP6	2
GO:0071384	cellular response to corticosteroid stimulus	2/180	55/11590	0.210237	1	1	FAM107A/KLF9	2
GO:0061136	regulation of proteasomal protein catabolic process	4/180	152/11590	0.211146	1	1	PINK1/GABARAPL2/GABARAP/CLU	4
GO:0070585	protein localization to mitochondrion	3/180	102/11590	0.211203	1	1	PINK1/MOAP1/VPS11	3
GO:0042445	hormone metabolic process	5/180	204/11590	0.211252	1	1	DHRS7/PDE8B/EDNRB/CPE/BBS1	5
GO:0031331	positive regulation of cellular catabolic process	7/180	313/11590	0.214254	1	1	PINK1/MOAP1/CPEB3/GABARAP/SLC4A4/CLU/SLC25A4	7
GO:0006119	oxidative phosphorylation	3/180	103/11590	0.215248	1	1	PINK1/ISCU/COX7A1	3
GO:0009416	response to light stimulus	6/180	259/11590	0.215388	1	1	PDE8B/SMPD1/MAPK10/PER1/CRY2/CIRBP	6
GO:0045453	bone resorption	2/180	56/11590	0.215945	1	1	PDK4/S1PR1	2
GO:0051881	regulation of mitochondrial membrane potential	2/180	56/11590	0.215945	1	1	PINK1/ARL6IP5	2
GO:0008154	actin polymerization or depolymerization	4/180	154/11590	0.217665	1	1	KANK3/FAM107A/ARHGAP6/ADD1	4
GO:1903052	positive regulation of proteolysis involved in protein catabolic process	3/180	104/11590	0.219309	1	1	GABARAP/RGN/CLU	3
GO:0006790	sulfur compound metabolic process	6/180	261/11590	0.220346	1	1	ACSM5/ISCU/ARL6IP5/PDK4/EDNRB/BTD	6
GO:0032507	maintenance of protein location in cell	2/180	57/11590	0.221667	1	1	PINK1/SYNE1	2
GO:1901264	carbohydrate derivative transport	2/180	57/11590	0.221667	1	1	SLC25A42/SLC25A4	2
GO:0001991	regulation of systemic arterial blood pressure by circulatory renin-angiotensin	1/180	16/11590	0.221669	1	1	EDNRB	1
GO:0006085	acetyl-CoA biosynthetic process	1/180	16/11590	0.221669	1	1	PDK4	1
GO:0006123	mitochondrial electron transport, cytochrome c to oxygen	1/180	16/11590	0.221669	1	1	COX7A1	1
GO:0006658	phosphatidylserine metabolic process	1/180	16/11590	0.221669	1	1	SERINC1	1
GO:0007042	lysosomal lumen acidification	1/180	16/11590	0.221669	1	1	CLN5	1
GO:0019896	axonal transport of mitochondrion	1/180	16/11590	0.221669	1	1	ARMCX3	1
GO:0032332	positive regulation of chondrocyte differentiation	1/180	16/11590	0.221669	1	1	ZBTB16	1
GO:0032516	positive regulation of phosphoprotein phosphatase activity	1/180	16/11590	0.221669	1	1	MAGI2	1
GO:0034755	iron ion transmembrane transport	1/180	16/11590	0.221669	1	1	ISCU	1
GO:0035930	corticosteroid hormone secretion	1/180	16/11590	0.221669	1	1	CRY2	1
GO:0036005	response to macrophage colony-stimulating factor	1/180	16/11590	0.221669	1	1	PDE2A	1
GO:0046068	cGMP metabolic process	1/180	16/11590	0.221669	1	1	PDE2A	1
GO:0061484	hematopoietic stem cell homeostasis	1/180	16/11590	0.221669	1	1	EMCN	1
GO:0072378	blood coagulation, fibrin clot formation	1/180	16/11590	0.221669	1	1	F8	1
GO:0090030	regulation of steroid hormone biosynthetic process	1/180	16/11590	0.221669	1	1	PDE8B	1
GO:0090141	positive regulation of mitochondrial fission	1/180	16/11590	0.221669	1	1	PINK1	1
GO:0098712	L-glutamate import across plasma membrane	1/180	16/11590	0.221669	1	1	ARL6IP5	1
GO:1900221	regulation of amyloid-beta clearance	1/180	16/11590	0.221669	1	1	CLU	1
GO:1902004	positive regulation of amyloid-beta formation	1/180	16/11590	0.221669	1	1	CLU	1
GO:1902883	negative regulation of response to oxidative stress	1/180	16/11590	0.221669	1	1	PINK1	1
GO:1905709	negative regulation of membrane permeability	1/180	16/11590	0.221669	1	1	SLC25A4	1
GO:2000757	negative regulation of peptidyl-lysine acetylation	1/180	16/11590	0.221669	1	1	KLF15	1
GO:0050890	cognition	6/180	262/11590	0.22284	1	1	CPEB3/FAM107A/ARL6IP5/ATP8A1/PJA2/PDE8B	6
GO:0051098	regulation of binding	7/180	317/11590	0.223244	1	1	AKTIP/PBXIP1/HABP4/CCPG1/CAMK1/CLN5/ADD1	7
GO:0042752	regulation of circadian rhythm	3/180	105/11590	0.223386	1	1	MAPK10/PER1/CRY2	3
GO:0043269	regulation of ion transport	11/180	543/11590	0.223738	1	1	PINK1/ISCU/ARL6IP5/RGN/KCNAB1/VAMP2/SCN1B/PER1/KCNK3/FHL1/CRY2	11
GO:0051604	protein maturation	6/180	263/11590	0.225343	1	1	APH1B/LMF1/RPS6KA2/F8/CPE/CLN5	6
GO:0009123	nucleoside monophosphate metabolic process	2/180	58/11590	0.227401	1	1	TK2/DLG2	2
GO:0046323	glucose import	2/180	58/11590	0.227401	1	1	KLF15/CREBL2	2
GO:0090559	regulation of membrane permeability	2/180	58/11590	0.227401	1	1	MOAP1/SLC25A4	2
GO:0006109	regulation of carbohydrate metabolic process	4/180	157/11590	0.227545	1	1	RGN/SLC4A4/PDK4/SCARB2	4
GO:0031647	regulation of protein stability	6/180	264/11590	0.227855	1	1	PINK1/VPS11/STX12/FAM107A/CREBL2/CLU	6
GO:0033365	protein localization to organelle	14/180	722/11590	0.231769	1	1	PINK1/MOAP1/VPS11/LMBRD1/TERF2IP/WBP2/SYNE1/GABARAPL2/ZBTB16/CRY2/CPE/CLU/SCARB2/BBS1	14
GO:0043462	regulation of ATP-dependent activity	2/180	59/11590	0.233146	1	1	GABARAPL2/RGN	2
GO:2000242	negative regulation of reproductive process	2/180	59/11590	0.233146	1	1	RGN/RPS6KA2	2
GO:0000272	polysaccharide catabolic process	1/180	17/11590	0.233774	1	1	GABARAPL1	1
GO:0008090	retrograde axonal transport	1/180	17/11590	0.233774	1	1	DLG2	1
GO:0009147	pyrimidine nucleoside triphosphate metabolic process	1/180	17/11590	0.233774	1	1	NME5	1
GO:0009220	pyrimidine ribonucleotide biosynthetic process	1/180	17/11590	0.233774	1	1	NME5	1
GO:0010738	regulation of protein kinase A signaling	1/180	17/11590	0.233774	1	1	PJA2	1
GO:0035739	CD4-positive, alpha-beta T cell proliferation	1/180	17/11590	0.233774	1	1	NDFIP1	1
GO:0035864	response to potassium ion	1/180	17/11590	0.233774	1	1	DLG2	1
GO:0043116	negative regulation of vascular permeability	1/180	17/11590	0.233774	1	1	PDE2A	1
GO:0043117	positive regulation of vascular permeability	1/180	17/11590	0.233774	1	1	PDE2A	1
GO:0043217	myelin maintenance	1/180	17/11590	0.233774	1	1	CLU	1
GO:0044090	positive regulation of vacuole organization	1/180	17/11590	0.233774	1	1	MOAP1	1
GO:0046827	positive regulation of protein export from nucleus	1/180	17/11590	0.233774	1	1	CAMK1	1
GO:1902430	negative regulation of amyloid-beta formation	1/180	17/11590	0.233774	1	1	CLU	1
GO:1903792	negative regulation of anion transport	1/180	17/11590	0.233774	1	1	ARL6IP5	1
GO:2000010	positive regulation of protein localization to cell surface	1/180	17/11590	0.233774	1	1	RIC3	1
GO:2000561	regulation of CD4-positive, alpha-beta T cell proliferation	1/180	17/11590	0.233774	1	1	NDFIP1	1
GO:0032874	positive regulation of stress-activated MAPK cascade	3/180	108/11590	0.235704	1	1	DIXDC1/ARL6IP5/PJA2	3
GO:0031396	regulation of protein ubiquitination	4/180	160/11590	0.237537	1	1	NDFIP1/PINK1/GABARAP/FAM107A	4
GO:0003407	neural retina development	2/180	60/11590	0.2389	1	1	PTPRM/GPM6A	2
GO:0008088	axo-dendritic transport	2/180	60/11590	0.2389	1	1	ARMCX3/DLG2	2
GO:1901224	positive regulation of NIK/NF-kappaB signaling	2/180	60/11590	0.2389	1	1	TERF2IP/NR3C2	2
GO:0031668	cellular response to extracellular stimulus	5/180	214/11590	0.239537	1	1	GABARAPL1/GABARAPL2/GABARAP/FAM107A/PDK4	5
GO:0048511	rhythmic process	6/180	269/11590	0.24055	1	1	TEF/MAPK10/PER1/HLF/CRY2/KLF9	6
GO:0071805	potassium ion transmembrane transport	4/180	161/11590	0.240891	1	1	KCNAB1/VAMP2/KCNK3/FHL1	4
GO:0016570	histone modification	8/180	381/11590	0.241005	1	1	PINK1/PBXIP1/EID1/WBP2/PHF1/PER1/NAP1L2/APBB1	8
GO:0110053	regulation of actin filament organization	5/180	215/11590	0.242423	1	1	KANK3/LIMCH1/S1PR1/ARHGAP6/ADD1	5
GO:0001952	regulation of cell-matrix adhesion	3/180	110/11590	0.243983	1	1	LIMCH1/FAM107A/ARHGAP6	3
GO:0009132	nucleoside diphosphate metabolic process	3/180	110/11590	0.243983	1	1	SLC4A4/NME5/DLG2	3
GO:0032368	regulation of lipid transport	3/180	110/11590	0.243983	1	1	ATP8A1/ABCA8/CRY2	3
GO:0070304	positive regulation of stress-activated protein kinase signaling cascade	3/180	110/11590	0.243983	1	1	DIXDC1/ARL6IP5/PJA2	3
GO:0032446	protein modification by small protein conjugation	12/180	613/11590	0.244485	1	1	RNF146/NDFIP1/PINK1/AKTIP/VPS11/SERGEF/FBXL5/GABARAP/FAM107A/PJA2/ZBTB16/TRIM23	12
GO:0032410	negative regulation of transporter activity	2/180	61/11590	0.244661	1	1	NDFIP1/KCNAB1	2
GO:1903578	regulation of ATP metabolic process	2/180	61/11590	0.244661	1	1	PINK1/SLC4A4	2
GO:2001259	positive regulation of cation channel activity	2/180	61/11590	0.244661	1	1	PINK1/KCNK3	2
GO:0010839	negative regulation of keratinocyte proliferation	1/180	18/11590	0.245691	1	1	KLF9	1
GO:0031290	retinal ganglion cell axon guidance	1/180	18/11590	0.245691	1	1	PTPRM	1
GO:0032780	negative regulation of ATP-dependent activity	1/180	18/11590	0.245691	1	1	RGN	1
GO:0045723	positive regulation of fatty acid biosynthetic process	1/180	18/11590	0.245691	1	1	RGN	1
GO:0046039	GTP metabolic process	1/180	18/11590	0.245691	1	1	NME5	1
GO:0048026	positive regulation of mRNA splicing, via spliceosome	1/180	18/11590	0.245691	1	1	CIRBP	1
GO:0060307	regulation of ventricular cardiac muscle cell membrane repolarization	1/180	18/11590	0.245691	1	1	SCN1B	1
GO:0060547	negative regulation of necrotic cell death	1/180	18/11590	0.245691	1	1	SLC25A4	1
GO:0097067	cellular response to thyroid hormone stimulus	1/180	18/11590	0.245691	1	1	KLF9	1
GO:1900151	regulation of nuclear-transcribed mRNA catabolic process, deadenylation-dependent decay	1/180	18/11590	0.245691	1	1	CPEB3	1
GO:1901017	negative regulation of potassium ion transmembrane transporter activity	1/180	18/11590	0.245691	1	1	KCNAB1	1
GO:1901984	negative regulation of protein acetylation	1/180	18/11590	0.245691	1	1	KLF15	1
GO:1903204	negative regulation of oxidative stress-induced neuron death	1/180	18/11590	0.245691	1	1	PINK1	1
GO:1903429	regulation of cell maturation	1/180	18/11590	0.245691	1	1	EDNRB	1
GO:2000811	negative regulation of anoikis	1/180	18/11590	0.245691	1	1	PDK4	1
GO:0032970	regulation of actin filament-based process	7/180	327/11590	0.246283	1	1	KANK3/DIXDC1/LIMCH1/FAM107A/S1PR1/ARHGAP6/ADD1	7
GO:0071248	cellular response to metal ion	4/180	163/11590	0.247632	1	1	SMPD1/KCNK3/DLG2/ADD1	4
GO:0030177	positive regulation of Wnt signaling pathway	3/180	111/11590	0.24814	1	1	DIXDC1/RNF146/PBXIP1	3
GO:0006334	nucleosome assembly	2/180	62/11590	0.250427	1	1	TSPYL1/NAP1L2	2
GO:0051339	regulation of lyase activity	2/180	62/11590	0.250427	1	1	ISCU/EDNRB	2
GO:1901657	glycosyl compound metabolic process	2/180	62/11590	0.250427	1	1	NME5/TK2	2
GO:2000134	negative regulation of G1/S transition of mitotic cell cycle	2/180	62/11590	0.250427	1	1	FAM107A/FHL1	2
GO:0051053	negative regulation of DNA metabolic process	3/180	112/11590	0.252308	1	1	NDFIP1/TERF2IP/RGN	3
GO:0002637	regulation of immunoglobulin production	2/180	63/11590	0.256198	1	1	NDFIP1/DNAJB9	2
GO:0072527	pyrimidine-containing compound metabolic process	2/180	63/11590	0.256198	1	1	NME5/TK2	2
GO:0019637	organophosphate metabolic process	15/180	797/11590	0.25623	1	1	PINK1/SERINC1/ACSM5/CRYL1/PDE7B/ABCA8/SLC4A4/PDE8B/NME5/TK2/SMPD1/PDK4/PDE2A/MOCS2/DLG2	15
GO:0010508	positive regulation of autophagy	3/180	113/11590	0.256487	1	1	PINK1/MOAP1/SLC25A4	3
GO:0098876	vesicle-mediated transport to the plasma membrane	3/180	113/11590	0.256487	1	1	STX12/VAMP2/BBS1	3
GO:0034220	ion transmembrane transport	16/180	857/11590	0.256962	1	1	SLC25A42/PINK1/ISCU/ARL6IP5/ATP8A1/RGN/SLC4A4/KCNAB1/VAMP2/SCN1B/KCNK3/GPM6A/FHL1/EDNRB/COX7A1/SLC25A4	16
GO:0006213	pyrimidine nucleoside metabolic process	1/180	19/11590	0.257424	1	1	TK2	1
GO:0009083	branched-chain amino acid catabolic process	1/180	19/11590	0.257424	1	1	IVD	1
GO:0010842	retina layer formation	1/180	19/11590	0.257424	1	1	PTPRM	1
GO:0021544	subpallium development	1/180	19/11590	0.257424	1	1	BBS1	1
GO:0031061	negative regulation of histone methylation	1/180	19/11590	0.257424	1	1	PHF1	1
GO:0031065	positive regulation of histone deacetylation	1/180	19/11590	0.257424	1	1	PINK1	1
GO:0031440	regulation of mRNA 3'-end processing	1/180	19/11590	0.257424	1	1	CPEB3	1
GO:0035020	regulation of Rac protein signal transduction	1/180	19/11590	0.257424	1	1	GABARAP	1
GO:0035751	regulation of lysosomal lumen pH	1/180	19/11590	0.257424	1	1	CLN5	1
GO:0035813	regulation of renal sodium excretion	1/180	19/11590	0.257424	1	1	EDNRB	1
GO:0036498	IRE1-mediated unfolded protein response	1/180	19/11590	0.257424	1	1	DNAJB9	1
GO:0045821	positive regulation of glycolytic process	1/180	19/11590	0.257424	1	1	SLC4A4	1
GO:0051131	chaperone-mediated protein complex assembly	1/180	19/11590	0.257424	1	1	CLU	1
GO:0071294	cellular response to zinc ion	1/180	19/11590	0.257424	1	1	KCNK3	1
GO:0072376	protein activation cascade	1/180	19/11590	0.257424	1	1	F8	1
GO:0086012	membrane depolarization during cardiac muscle cell action potential	1/180	19/11590	0.257424	1	1	SCN1B	1
GO:0098780	response to mitochondrial depolarisation	1/180	19/11590	0.257424	1	1	PINK1	1
GO:2000738	positive regulation of stem cell differentiation	1/180	19/11590	0.257424	1	1	NAP1L2	1
GO:0042594	response to starvation	4/180	167/11590	0.261235	1	1	GABARAPL1/GABARAPL2/GABARAP/PDK4	4
GO:0098662	inorganic cation transmembrane transport	12/180	623/11590	0.261695	1	1	ISCU/RGN/SLC4A4/KCNAB1/VAMP2/SCN1B/KCNK3/GPM6A/FHL1/EDNRB/COX7A1/SLC25A4	12
GO:0006809	nitric oxide biosynthetic process	2/180	64/11590	0.261971	1	1	RGN/CLU	2
GO:0010827	regulation of glucose transmembrane transport	2/180	64/11590	0.261971	1	1	KLF15/CREBL2	2
GO:0032272	negative regulation of protein polymerization	2/180	64/11590	0.261971	1	1	KANK3/ADD1	2
GO:0043967	histone H4 acetylation	2/180	64/11590	0.261971	1	1	PER1/APBB1	2
GO:0140056	organelle localization by membrane tethering	2/180	64/11590	0.261971	1	1	VPS11/STX12	2
GO:1903201	regulation of oxidative stress-induced cell death	2/180	64/11590	0.261971	1	1	PINK1/NME5	2
GO:0030163	protein catabolic process	14/180	742/11590	0.263081	1	1	RNF146/NDFIP1/UBXN6/PINK1/VPS11/SERGEF/FBXL5/GABARAPL2/GABARAP/RGN/DNAJB9/CTSO/CLN5/CLU	14
GO:0043603	cellular amide metabolic process	16/180	863/11590	0.265899	1	1	APH1B/PINK1/ACSM5/HABP4/CPEB3/ARL6IP5/ABCA8/SECISBP2L/SMPD1/PER1/PDK4/CPE/CLN5/CLU/CIRBP/BTD	16
GO:0034103	regulation of tissue remodeling	2/180	65/11590	0.267745	1	1	PDK4/S1PR1	2
GO:0060294	cilium movement involved in cell motility	2/180	65/11590	0.267745	1	1	RGN/BBS1	2
GO:1903533	regulation of protein targeting	2/180	65/11590	0.267745	1	1	PINK1/VPS11	2
GO:0007249	I-kappaB kinase/NF-kappaB signaling	5/180	224/11590	0.268792	1	1	NDFIP1/PINK1/TERF2IP/PER1/EDNRB	5
GO:0009110	vitamin biosynthetic process	1/180	20/11590	0.268976	1	1	RGN	1
GO:0009162	deoxyribonucleoside monophosphate metabolic process	1/180	20/11590	0.268976	1	1	TK2	1
GO:0014821	phasic smooth muscle contraction	1/180	20/11590	0.268976	1	1	EDNRB	1
GO:0030810	positive regulation of nucleotide biosynthetic process	1/180	20/11590	0.268976	1	1	PINK1	1
GO:0032891	negative regulation of organic acid transport	1/180	20/11590	0.268976	1	1	ARL6IP5	1
GO:0035812	renal sodium excretion	1/180	20/11590	0.268976	1	1	EDNRB	1
GO:0043931	ossification involved in bone maturation	1/180	20/11590	0.268976	1	1	ZBTB16	1
GO:0051016	barbed-end actin filament capping	1/180	20/11590	0.268976	1	1	ADD1	1
GO:0051457	maintenance of protein location in nucleus	1/180	20/11590	0.268976	1	1	SYNE1	1
GO:0070841	inclusion body assembly	1/180	20/11590	0.268976	1	1	CLU	1
GO:0090201	negative regulation of release of cytochrome c from mitochondria	1/180	20/11590	0.268976	1	1	CLU	1
GO:1900373	positive regulation of purine nucleotide biosynthetic process	1/180	20/11590	0.268976	1	1	PINK1	1
GO:1901028	regulation of mitochondrial outer membrane permeabilization involved in apoptotic signaling pathway	1/180	20/11590	0.268976	1	1	SLC25A4	1
GO:1902992	negative regulation of amyloid precursor protein catabolic process	1/180	20/11590	0.268976	1	1	CLU	1
GO:2000310	regulation of NMDA receptor activity	1/180	20/11590	0.268976	1	1	PINK1	1
GO:2000765	regulation of cytoplasmic translation	1/180	20/11590	0.268976	1	1	CPEB3	1
GO:0031333	negative regulation of protein-containing complex assembly	3/180	116/11590	0.269078	1	1	KANK3/CLU/ADD1	3
GO:0043271	negative regulation of ion transport	3/180	116/11590	0.269078	1	1	ISCU/ARL6IP5/KCNAB1	3
GO:0032922	circadian regulation of gene expression	2/180	66/11590	0.273519	1	1	PER1/CRY2	2
GO:0051453	regulation of intracellular pH	2/180	66/11590	0.273519	1	1	SLC4A4/CLN5	2
GO:1905897	regulation of response to endoplasmic reticulum stress	2/180	66/11590	0.273519	1	1	DNAJB9/CLU	2
GO:0051258	protein polymerization	5/180	226/11590	0.274739	1	1	KANK3/PINK1/FAM107A/ARHGAP6/ADD1	5
GO:0002532	production of molecular mediator involved in inflammatory response	2/180	67/11590	0.279291	1	1	PBXIP1/PER1	2
GO:0006637	acyl-CoA metabolic process	2/180	67/11590	0.279291	1	1	ACSM5/PDK4	2
GO:0035383	thioester metabolic process	2/180	67/11590	0.279291	1	1	ACSM5/PDK4	2
GO:0045913	positive regulation of carbohydrate metabolic process	2/180	67/11590	0.279291	1	1	RGN/SLC4A4	2
GO:0071277	cellular response to calcium ion	2/180	67/11590	0.279291	1	1	SMPD1/ADD1	2
GO:0002092	positive regulation of receptor internalization	1/180	21/11590	0.280349	1	1	MAGI2	1
GO:0003298	physiological muscle hypertrophy	1/180	21/11590	0.280349	1	1	SORBS2	1
GO:0003299	muscle hypertrophy in response to stress	1/180	21/11590	0.280349	1	1	KLF15	1
GO:0003301	physiological cardiac muscle hypertrophy	1/180	21/11590	0.280349	1	1	SORBS2	1
GO:0003401	axis elongation	1/180	21/11590	0.280349	1	1	MAGI2	1
GO:0007194	negative regulation of adenylate cyclase activity	1/180	21/11590	0.280349	1	1	EDNRB	1
GO:0014887	cardiac muscle adaptation	1/180	21/11590	0.280349	1	1	KLF15	1
GO:0014898	cardiac muscle hypertrophy in response to stress	1/180	21/11590	0.280349	1	1	KLF15	1
GO:0022010	central nervous system myelination	1/180	21/11590	0.280349	1	1	CLU	1
GO:0032291	axon ensheathment in central nervous system	1/180	21/11590	0.280349	1	1	CLU	1
GO:0032925	regulation of activin receptor signaling pathway	1/180	21/11590	0.280349	1	1	MAGI2	1
GO:0035809	regulation of urine volume	1/180	21/11590	0.280349	1	1	EDNRB	1
GO:0044062	regulation of excretion	1/180	21/11590	0.280349	1	1	EDNRB	1
GO:0051788	response to misfolded protein	1/180	21/11590	0.280349	1	1	CLU	1
GO:0060143	positive regulation of syncytium formation by plasma membrane fusion	1/180	21/11590	0.280349	1	1	CAMK1	1
GO:0060544	regulation of necroptotic process	1/180	21/11590	0.280349	1	1	SLC25A4	1
GO:0061049	cell growth involved in cardiac muscle cell development	1/180	21/11590	0.280349	1	1	SORBS2	1
GO:1901018	positive regulation of potassium ion transmembrane transporter activity	1/180	21/11590	0.280349	1	1	KCNK3	1
GO:1902993	positive regulation of amyloid precursor protein catabolic process	1/180	21/11590	0.280349	1	1	CLU	1
GO:1903205	regulation of hydrogen peroxide-induced cell death	1/180	21/11590	0.280349	1	1	PINK1	1
GO:1903902	positive regulation of viral life cycle	1/180	21/11590	0.280349	1	1	SMPD1	1
GO:1903959	regulation of anion transmembrane transport	1/180	21/11590	0.280349	1	1	ARL6IP5	1
GO:2000831	regulation of steroid hormone secretion	1/180	21/11590	0.280349	1	1	CRY2	1
GO:0030001	metal ion transport	13/180	694/11590	0.282067	1	1	NDFIP1/SLC22A17/ISCU/RGN/SLC4A4/KCNAB1/VAMP2/SCN1B/PER1/KCNK3/GPM6A/FHL1/EDNRB	13
GO:0019226	transmission of nerve impulse	2/180	68/11590	0.28506	1	1	SCN1B/S1PR1	2
GO:0032436	positive regulation of proteasomal ubiquitin-dependent protein catabolic process	2/180	68/11590	0.28506	1	1	GABARAP/CLU	2
GO:0045638	negative regulation of myeloid cell differentiation	2/180	68/11590	0.28506	1	1	ZBTB16/TCTA	2
GO:0046209	nitric oxide metabolic process	2/180	68/11590	0.28506	1	1	RGN/CLU	2
GO:0055017	cardiac muscle tissue growth	2/180	68/11590	0.28506	1	1	SORBS2/S1PR1	2
GO:0071260	cellular response to mechanical stimulus	2/180	68/11590	0.28506	1	1	HABP4/PDE2A	2
GO:0032388	positive regulation of intracellular transport	4/180	174/11590	0.285368	1	1	PINK1/VPS11/CAMK1/VAMP2	4
GO:0048284	organelle fusion	3/180	120/11590	0.285972	1	1	VPS11/STX12/VAMP2	3
GO:0007268	chemical synaptic transmission	11/180	578/11590	0.287073	1	1	RIC3/PINK1/PDE7B/CPEB3/GABARAP/FAM107A/VAMP2/RPS6KA2/PTPRN2/KCNK3/DLG2	11
GO:0098916	anterograde trans-synaptic signaling	11/180	578/11590	0.287073	1	1	RIC3/PINK1/PDE7B/CPEB3/GABARAP/FAM107A/VAMP2/RPS6KA2/PTPRN2/KCNK3/DLG2	11
GO:0002028	regulation of sodium ion transport	2/180	69/11590	0.290825	1	1	SCN1B/PER1	2
GO:0030641	regulation of cellular pH	2/180	69/11590	0.290825	1	1	SLC4A4/CLN5	2
GO:0046889	positive regulation of lipid biosynthetic process	2/180	69/11590	0.290825	1	1	RGN/CREBL2	2
GO:2001057	reactive nitrogen species metabolic process	2/180	69/11590	0.290825	1	1	RGN/CLU	2
GO:0001778	plasma membrane repair	1/180	22/11590	0.291546	1	1	SMPD1	1
GO:0003351	epithelial cilium movement involved in extracellular fluid movement	1/180	22/11590	0.291546	1	1	NME5	1
GO:0006817	phosphate ion transport	1/180	22/11590	0.291546	1	1	CRY2	1
GO:0007620	copulation	1/180	22/11590	0.291546	1	1	EDNRB	1
GO:0010894	negative regulation of steroid biosynthetic process	1/180	22/11590	0.291546	1	1	PDE8B	1
GO:0015701	bicarbonate transport	1/180	22/11590	0.291546	1	1	SLC4A4	1
GO:0019432	triglyceride biosynthetic process	1/180	22/11590	0.291546	1	1	RGN	1
GO:0030149	sphingolipid catabolic process	1/180	22/11590	0.291546	1	1	SMPD1	1
GO:0032801	receptor catabolic process	1/180	22/11590	0.291546	1	1	GPRASP1	1
GO:0035988	chondrocyte proliferation	1/180	22/11590	0.291546	1	1	PBXIP1	1
GO:0040020	regulation of meiotic nuclear division	1/180	22/11590	0.291546	1	1	RPS6KA2	1
GO:0043094	cellular metabolic compound salvage	1/180	22/11590	0.291546	1	1	TK2	1
GO:0099623	regulation of cardiac muscle cell membrane repolarization	1/180	22/11590	0.291546	1	1	SCN1B	1
GO:1901380	negative regulation of potassium ion transmembrane transport	1/180	22/11590	0.291546	1	1	KCNAB1	1
GO:0055086	nucleobase-containing small molecule metabolic process	10/180	523/11590	0.295155	1	1	PINK1/ACSM5/PDE7B/SLC4A4/PDE8B/NME5/TK2/PDK4/PDE2A/DLG2	10
GO:0007611	learning or memory	5/180	233/11590	0.295762	1	1	CPEB3/ARL6IP5/ATP8A1/PJA2/PDE8B	5
GO:0050821	protein stabilization	4/180	177/11590	0.295815	1	1	PINK1/STX12/CREBL2/CLU	4
GO:0007193	adenylate cyclase-inhibiting G protein-coupled receptor signaling pathway	2/180	70/11590	0.296584	1	1	PDE2A/S1PR1	2
GO:0007015	actin filament organization	7/180	348/11590	0.29684	1	1	KANK3/LIMCH1/FAM107A/SORBS2/S1PR1/ARHGAP6/ADD1	7
GO:0062013	positive regulation of small molecule metabolic process	3/180	123/11590	0.2987	1	1	PINK1/RGN/SLC4A4	3
GO:0099537	trans-synaptic signaling	11/180	585/11590	0.300361	1	1	RIC3/PINK1/PDE7B/CPEB3/GABARAP/FAM107A/VAMP2/RPS6KA2/PTPRN2/KCNK3/DLG2	11
GO:0000002	mitochondrial genome maintenance	1/180	23/11590	0.302569	1	1	SLC25A4	1
GO:0003071	renal system process involved in regulation of systemic arterial blood pressure	1/180	23/11590	0.302569	1	1	EDNRB	1
GO:0009218	pyrimidine ribonucleotide metabolic process	1/180	23/11590	0.302569	1	1	NME5	1
GO:0010875	positive regulation of cholesterol efflux	1/180	23/11590	0.302569	1	1	ABCA8	1
GO:0014829	vascular associated smooth muscle contraction	1/180	23/11590	0.302569	1	1	EDNRB	1
GO:0016226	iron-sulfur cluster assembly	1/180	23/11590	0.302569	1	1	ISCU	1
GO:0030318	melanocyte differentiation	1/180	23/11590	0.302569	1	1	EDNRB	1
GO:0031163	metallo-sulfur cluster assembly	1/180	23/11590	0.302569	1	1	ISCU	1
GO:0031280	negative regulation of cyclase activity	1/180	23/11590	0.302569	1	1	EDNRB	1
GO:0032369	negative regulation of lipid transport	1/180	23/11590	0.302569	1	1	CRY2	1
GO:0034123	positive regulation of toll-like receptor signaling pathway	1/180	23/11590	0.302569	1	1	PJA2	1
GO:0046037	GMP metabolic process	1/180	23/11590	0.302569	1	1	DLG2	1
GO:0050927	positive regulation of positive chemotaxis	1/180	23/11590	0.302569	1	1	S1PR1	1
GO:0051443	positive regulation of ubiquitin-protein transferase activity	1/180	23/11590	0.302569	1	1	PINK1	1
GO:0070199	establishment of protein localization to chromosome	1/180	23/11590	0.302569	1	1	WBP2	1
GO:0070977	bone maturation	1/180	23/11590	0.302569	1	1	ZBTB16	1
GO:0090140	regulation of mitochondrial fission	1/180	23/11590	0.302569	1	1	PINK1	1
GO:0099625	ventricular cardiac muscle cell membrane repolarization	1/180	23/11590	0.302569	1	1	SCN1B	1
GO:1902074	response to salt	1/180	23/11590	0.302569	1	1	EDNRB	1
GO:1903649	regulation of cytoplasmic transport	1/180	23/11590	0.302569	1	1	VPS11	1
GO:2000209	regulation of anoikis	1/180	23/11590	0.302569	1	1	PDK4	1
GO:0006665	sphingolipid metabolic process	3/180	124/11590	0.302951	1	1	SERINC1/ABCA8/SMPD1	3
GO:0050680	negative regulation of epithelial cell proliferation	3/180	124/11590	0.302951	1	1	RGN/PTPRM/KLF9	3
GO:0033043	regulation of organelle organization	17/180	950/11590	0.306268	1	1	KANK3/DIXDC1/PINK1/MOAP1/VPS11/TERF2IP/LIMCH1/FAM107A/MPDZ/RPS6KA2/PDE2A/S1PR1/CLU/SCARB2/ARHGAP6/SLC25A4/ADD1	17
GO:0016241	regulation of macroautophagy	3/180	125/11590	0.307205	1	1	PINK1/MOAP1/SLC25A4	3
GO:0003300	cardiac muscle hypertrophy	2/180	72/11590	0.308081	1	1	KLF15/SORBS2	2
GO:0006641	triglyceride metabolic process	2/180	72/11590	0.308081	1	1	LMF1/RGN	2
GO:0009894	regulation of catabolic process	14/180	771/11590	0.310977	1	1	NDFIP1/PINK1/MOAP1/VPS11/FBXL5/CPEB3/GABARAPL2/GABARAP/RGN/SLC4A4/CLU/CIRBP/SCARB2/SLC25A4	14
GO:0006633	fatty acid biosynthetic process	3/180	126/11590	0.311461	1	1	ACSM5/RGN/PDK4	3
GO:0000289	nuclear-transcribed mRNA poly(A) tail shortening	1/180	24/11590	0.313422	1	1	CPEB3	1
GO:0001963	synaptic transmission, dopaminergic	1/180	24/11590	0.313422	1	1	PINK1	1
GO:0006221	pyrimidine nucleotide biosynthetic process	1/180	24/11590	0.313422	1	1	NME5	1
GO:0006858	extracellular transport	1/180	24/11590	0.313422	1	1	NME5	1
GO:0006891	intra-Golgi vesicle-mediated transport	1/180	24/11590	0.313422	1	1	GABARAPL2	1
GO:0009081	branched-chain amino acid metabolic process	1/180	24/11590	0.313422	1	1	IVD	1
GO:0021952	central nervous system projection neuron axonogenesis	1/180	24/11590	0.313422	1	1	SCN1B	1
GO:0034260	negative regulation of GTPase activity	1/180	24/11590	0.313422	1	1	RGN	1
GO:0034643	establishment of mitochondrion localization, microtubule-mediated	1/180	24/11590	0.313422	1	1	ARMCX3	1
GO:0035929	steroid hormone secretion	1/180	24/11590	0.313422	1	1	CRY2	1
GO:0036474	cell death in response to hydrogen peroxide	1/180	24/11590	0.313422	1	1	PINK1	1
GO:0038095	Fc-epsilon receptor signaling pathway	1/180	24/11590	0.313422	1	1	MAPK10	1
GO:0043247	telomere maintenance in response to DNA damage	1/180	24/11590	0.313422	1	1	TERF2IP	1
GO:0043949	regulation of cAMP-mediated signaling	1/180	24/11590	0.313422	1	1	PDE2A	1
GO:0045939	negative regulation of steroid metabolic process	1/180	24/11590	0.313422	1	1	PDE8B	1
GO:0045948	positive regulation of translational initiation	1/180	24/11590	0.313422	1	1	HABP4	1
GO:0046885	regulation of hormone biosynthetic process	1/180	24/11590	0.313422	1	1	PDE8B	1
GO:0047497	mitochondrion transport along microtubule	1/180	24/11590	0.313422	1	1	ARMCX3	1
GO:0050926	regulation of positive chemotaxis	1/180	24/11590	0.313422	1	1	S1PR1	1
GO:0051350	negative regulation of lyase activity	1/180	24/11590	0.313422	1	1	EDNRB	1
GO:0062098	regulation of programmed necrotic cell death	1/180	24/11590	0.313422	1	1	SLC25A4	1
GO:1900101	regulation of endoplasmic reticulum unfolded protein response	1/180	24/11590	0.313422	1	1	DNAJB9	1
GO:1900745	positive regulation of p38MAPK cascade	1/180	24/11590	0.313422	1	1	PJA2	1
GO:0008625	extrinsic apoptotic signaling pathway via death domain receptors	2/180	73/11590	0.313816	1	1	MOAP1/GABARAP	2
GO:0015914	phospholipid transport	2/180	73/11590	0.313816	1	1	ATP8A1/SCARB2	2
GO:0022406	membrane docking	2/180	73/11590	0.313816	1	1	VPS11/STX12	2
GO:0033555	multicellular organismal response to stress	2/180	73/11590	0.313816	1	1	PDE8B/EDNRB	2
GO:0051899	membrane depolarization	2/180	73/11590	0.313816	1	1	SCN1B/FHL1	2
GO:1900407	regulation of cellular response to oxidative stress	2/180	73/11590	0.313816	1	1	PINK1/NME5	2
GO:1904063	negative regulation of cation transmembrane transport	2/180	73/11590	0.313816	1	1	ISCU/KCNAB1	2
GO:0021700	developmental maturation	5/180	239/11590	0.313996	1	1	ZBTB16/RPS6KA2/EDNRB/S1PR1/CLN5	5
GO:0072073	kidney epithelium development	3/180	127/11590	0.315719	1	1	KLF15/MAGI2/EDNRB	3
GO:0072594	establishment of protein localization to organelle	7/180	357/11590	0.319198	1	1	PINK1/MOAP1/VPS11/WBP2/CRY2/CLU/SCARB2	7
GO:0001539	cilium or flagellum-dependent cell motility	2/180	74/11590	0.319541	1	1	RGN/BBS1	2
GO:0014897	striated muscle hypertrophy	2/180	74/11590	0.319541	1	1	KLF15/SORBS2	2
GO:0032370	positive regulation of lipid transport	2/180	74/11590	0.319541	1	1	ATP8A1/ABCA8	2
GO:0060285	cilium-dependent cell motility	2/180	74/11590	0.319541	1	1	RGN/BBS1	2
GO:0060291	long-term synaptic potentiation	2/180	74/11590	0.319541	1	1	FAM107A/VAMP2	2
GO:0035966	response to topologically incorrect protein	3/180	128/11590	0.319978	1	1	PACRG/DNAJB9/CLU	3
GO:0006605	protein targeting	5/180	241/11590	0.320109	1	1	PINK1/VPS11/GABARAP/CLU/SCARB2	5
GO:0031346	positive regulation of cell projection organization	6/180	300/11590	0.323178	1	1	DIXDC1/MAGI2/CAMK1/SCN1B/GPM6A/SCARB2	6
GO:0006813	potassium ion transport	4/180	185/11590	0.323887	1	1	KCNAB1/VAMP2/KCNK3/FHL1	4
GO:0007623	circadian rhythm	4/180	185/11590	0.323887	1	1	MAPK10/PER1/CRY2/KLF9	4
GO:0010669	epithelial structure maintenance	1/180	25/11590	0.324108	1	1	LDB2	1
GO:0042634	regulation of hair cycle	1/180	25/11590	0.324108	1	1	PER1	1
GO:0045880	positive regulation of smoothened signaling pathway	1/180	25/11590	0.324108	1	1	TXNDC15	1
GO:0048265	response to pain	1/180	25/11590	0.324108	1	1	EDNRB	1
GO:0051953	negative regulation of amine transport	1/180	25/11590	0.324108	1	1	ARL6IP5	1
GO:0060142	regulation of syncytium formation by plasma membrane fusion	1/180	25/11590	0.324108	1	1	CAMK1	1
GO:0070198	protein localization to chromosome, telomeric region	1/180	25/11590	0.324108	1	1	TERF2IP	1
GO:0090312	positive regulation of protein deacetylation	1/180	25/11590	0.324108	1	1	PINK1	1
GO:1902914	regulation of protein polyubiquitination	1/180	25/11590	0.324108	1	1	GABARAP	1
GO:0010675	regulation of cellular carbohydrate metabolic process	3/180	129/11590	0.324238	1	1	RGN/PDK4/SCARB2	3
GO:0016482	cytosolic transport	3/180	129/11590	0.324238	1	1	AKTIP/VPS11/CLN5	3
GO:0060419	heart growth	2/180	75/11590	0.325255	1	1	SORBS2/S1PR1	2
GO:0043270	positive regulation of ion transport	5/180	243/11590	0.326236	1	1	PINK1/RGN/SCN1B/KCNK3/FHL1	5
GO:0014896	muscle hypertrophy	2/180	76/11590	0.330956	1	1	KLF15/SORBS2	2
GO:0060996	dendritic spine development	2/180	76/11590	0.330956	1	1	CPEB3/CAMK1	2
GO:0006631	fatty acid metabolic process	6/180	303/11590	0.331427	1	1	ACBD4/ACSM5/CRYL1/RGN/PDK4/IVD	6
GO:0045862	positive regulation of proteolysis	6/180	303/11590	0.331427	1	1	APH1B/PINK1/GABARAP/ARL6IP5/RGN/CLU	6
GO:0015813	L-glutamate transmembrane transport	1/180	26/11590	0.334627	1	1	ARL6IP5	1
GO:0035116	embryonic hindlimb morphogenesis	1/180	26/11590	0.334627	1	1	ZBTB16	1
GO:0046466	membrane lipid catabolic process	1/180	26/11590	0.334627	1	1	SMPD1	1
GO:0051204	protein insertion into mitochondrial membrane	1/180	26/11590	0.334627	1	1	MOAP1	1
GO:0051491	positive regulation of filopodium assembly	1/180	26/11590	0.334627	1	1	GPM6A	1
GO:0051938	L-glutamate import	1/180	26/11590	0.334627	1	1	ARL6IP5	1
GO:0097066	response to thyroid hormone	1/180	26/11590	0.334627	1	1	KLF9	1
GO:0055080	cation homeostasis	9/180	483/11590	0.336118	1	1	NDFIP1/SLC22A17/FBXL5/ISCU/RGN/SLC4A4/PDK4/EDNRB/CLN5	9
GO:0010232	vascular transport	2/180	77/11590	0.336644	1	1	ATP8A1/SLC4A4	2
GO:0016575	histone deacetylation	2/180	77/11590	0.336644	1	1	PINK1/PER1	2
GO:0019217	regulation of fatty acid metabolic process	2/180	77/11590	0.336644	1	1	RGN/PDK4	2
GO:0150104	transport across blood-brain barrier	2/180	77/11590	0.336644	1	1	ATP8A1/SLC4A4	2
GO:1902882	regulation of response to oxidative stress	2/180	77/11590	0.336644	1	1	PINK1/NME5	2
GO:0050806	positive regulation of synaptic transmission	3/180	132/11590	0.337018	1	1	PINK1/FAM107A/VAMP2	3
GO:0072006	nephron development	3/180	132/11590	0.337018	1	1	KLF15/MAGI2/EDNRB	3
GO:0002064	epithelial cell development	4/180	189/11590	0.338001	1	1	MAGI2/PDE2A/EDNRB/ADD1	4
GO:0006814	sodium ion transport	4/180	189/11590	0.338001	1	1	SLC4A4/SCN1B/PER1/EDNRB	4
GO:0099536	synaptic signaling	11/180	605/11590	0.339173	1	1	RIC3/PINK1/PDE7B/CPEB3/GABARAP/FAM107A/VAMP2/RPS6KA2/PTPRN2/KCNK3/DLG2	11
GO:0070507	regulation of microtubule cytoskeleton organization	3/180	133/11590	0.341276	1	1	DIXDC1/FAM107A/MPDZ	3
GO:1905952	regulation of lipid localization	3/180	133/11590	0.341276	1	1	ATP8A1/ABCA8/CRY2	3
GO:0071241	cellular response to inorganic substance	4/180	190/11590	0.341534	1	1	SMPD1/KCNK3/DLG2/ADD1	4
GO:0030148	sphingolipid biosynthetic process	2/180	78/11590	0.342318	1	1	ABCA8/SMPD1	2
GO:0034620	cellular response to unfolded protein	2/180	78/11590	0.342318	1	1	PACRG/DNAJB9	2
GO:0045185	maintenance of protein location	2/180	78/11590	0.342318	1	1	PINK1/SYNE1	2
GO:0006417	regulation of translation	6/180	307/11590	0.342468	1	1	PINK1/HABP4/CPEB3/SECISBP2L/PER1/CIRBP	6
GO:1902903	regulation of supramolecular fiber organization	6/180	307/11590	0.342468	1	1	KANK3/LIMCH1/S1PR1/CLU/ARHGAP6/ADD1	6
GO:0001556	oocyte maturation	1/180	27/11590	0.344984	1	1	RPS6KA2	1
GO:0007035	vacuolar acidification	1/180	27/11590	0.344984	1	1	CLN5	1
GO:0007202	activation of phospholipase C activity	1/180	27/11590	0.344984	1	1	ARHGAP6	1
GO:0007271	synaptic transmission, cholinergic	1/180	27/11590	0.344984	1	1	RIC3	1
GO:0021799	cerebral cortex radially oriented cell migration	1/180	27/11590	0.344984	1	1	DIXDC1	1
GO:0032205	negative regulation of telomere maintenance	1/180	27/11590	0.344984	1	1	TERF2IP	1
GO:0034063	stress granule assembly	1/180	27/11590	0.344984	1	1	CIRBP	1
GO:0042044	fluid transport	1/180	27/11590	0.344984	1	1	EDNRB	1
GO:0045494	photoreceptor cell maintenance	1/180	27/11590	0.344984	1	1	BBS1	1
GO:0045671	negative regulation of osteoclast differentiation	1/180	27/11590	0.344984	1	1	TCTA	1
GO:0048799	animal organ maturation	1/180	27/11590	0.344984	1	1	ZBTB16	1
GO:0051654	establishment of mitochondrion localization	1/180	27/11590	0.344984	1	1	ARMCX3	1
GO:0061036	positive regulation of cartilage development	1/180	27/11590	0.344984	1	1	ZBTB16	1
GO:0070293	renal absorption	1/180	27/11590	0.344984	1	1	EDNRB	1
GO:0097254	renal tubular secretion	1/180	27/11590	0.344984	1	1	EDNRB	1
GO:1901031	regulation of response to reactive oxygen species	1/180	27/11590	0.344984	1	1	PINK1	1
GO:1902230	negative regulation of intrinsic apoptotic signaling pathway in response to DNA damage	1/180	27/11590	0.344984	1	1	CLU	1
GO:1903203	regulation of oxidative stress-induced neuron death	1/180	27/11590	0.344984	1	1	PINK1	1
GO:2000515	negative regulation of CD4-positive, alpha-beta T cell activation	1/180	27/11590	0.344984	1	1	NDFIP1	1
GO:2001234	negative regulation of apoptotic signaling pathway	4/180	191/11590	0.345068	1	1	PINK1/NME5/CLU/SLC25A4	4
GO:0016052	carbohydrate catabolic process	3/180	134/11590	0.345533	1	1	GABARAPL1/SLC4A4/SCARB2	3
GO:0022900	electron transport chain	3/180	134/11590	0.345533	1	1	PINK1/ISCU/COX7A1	3
GO:0032092	positive regulation of protein binding	2/180	79/11590	0.347977	1	1	AKTIP/ADD1	2
GO:0044070	regulation of anion transport	2/180	79/11590	0.347977	1	1	ARL6IP5/CRY2	2
GO:0061025	membrane fusion	3/180	135/11590	0.349787	1	1	VPS11/STX12/VAMP2	3
GO:0000041	transition metal ion transport	2/180	80/11590	0.353619	1	1	SLC22A17/ISCU	2
GO:0006626	protein targeting to mitochondrion	2/180	80/11590	0.353619	1	1	PINK1/VPS11	2
GO:0046849	bone remodeling	2/180	80/11590	0.353619	1	1	PDK4/S1PR1	2
GO:2000112	regulation of cellular macromolecule biosynthetic process	7/180	371/11590	0.354522	1	1	PINK1/HABP4/CPEB3/SECISBP2L/ITM2B/PER1/CIRBP	7
GO:0006084	acetyl-CoA metabolic process	1/180	28/11590	0.355181	1	1	PDK4	1
GO:0006308	DNA catabolic process	1/180	28/11590	0.355181	1	1	RGN	1
GO:0007007	inner mitochondrial membrane organization	1/180	28/11590	0.355181	1	1	PINK1	1
GO:0010765	positive regulation of sodium ion transport	1/180	28/11590	0.355181	1	1	SCN1B	1
GO:0014046	dopamine secretion	1/180	28/11590	0.355181	1	1	PINK1	1
GO:0014059	regulation of dopamine secretion	1/180	28/11590	0.355181	1	1	PINK1	1
GO:0016242	negative regulation of macroautophagy	1/180	28/11590	0.355181	1	1	PINK1	1
GO:0032148	activation of protein kinase B activity	1/180	28/11590	0.355181	1	1	PINK1	1
GO:0032509	endosome transport via multivesicular body sorting pathway	1/180	28/11590	0.355181	1	1	UBXN6	1
GO:0032633	interleukin-4 production	1/180	28/11590	0.355181	1	1	NDFIP1	1
GO:0032673	regulation of interleukin-4 production	1/180	28/11590	0.355181	1	1	NDFIP1	1
GO:0046460	neutral lipid biosynthetic process	1/180	28/11590	0.355181	1	1	RGN	1
GO:0046463	acylglycerol biosynthetic process	1/180	28/11590	0.355181	1	1	RGN	1
GO:0048489	synaptic vesicle transport	1/180	28/11590	0.355181	1	1	PINK1	1
GO:0048854	brain morphogenesis	1/180	28/11590	0.355181	1	1	BBS1	1
GO:0051482	positive regulation of cytosolic calcium ion concentration involved in phospholipase C-activating G protein-coupled signaling pathway	1/180	28/11590	0.355181	1	1	S1PR1	1
GO:0090207	regulation of triglyceride metabolic process	1/180	28/11590	0.355181	1	1	RGN	1
GO:0097421	liver regeneration	1/180	28/11590	0.355181	1	1	RGN	1
GO:0033157	regulation of intracellular protein transport	4/180	194/11590	0.355676	1	1	PINK1/VPS11/CAMK1/VAMP2	4
GO:0006869	lipid transport	6/180	312/11590	0.356323	1	1	STX12/ATP8A1/ABCA8/CRY2/CLU/SCARB2	6
GO:0006886	intracellular protein transport	12/180	675/11590	0.356848	1	1	PINK1/MOAP1/VPS11/STX12/GABARAP/CAMK1/VAMP2/DLG2/CRY2/CLU/SCARB2/TRIM23	12
GO:0043409	negative regulation of MAPK cascade	3/180	137/11590	0.358286	1	1	PINK1/SMPD1/PER1	3
GO:0007281	germ cell development	4/180	195/11590	0.359212	1	1	PACRG/NME5/ZBTB16/RPS6KA2	4
GO:0034502	protein localization to chromosome	2/180	81/11590	0.359245	1	1	TERF2IP/WBP2	2
GO:0036503	ERAD pathway	2/180	81/11590	0.359245	1	1	UBXN6/DNAJB9	2
GO:0046330	positive regulation of JNK cascade	2/180	81/11590	0.359245	1	1	DIXDC1/PJA2	2
GO:0097193	intrinsic apoptotic signaling pathway	5/180	255/11590	0.363215	1	1	PINK1/MOAP1/ARL6IP5/NME5/CLU	5
GO:0051130	positive regulation of cellular component organization	15/180	863/11590	0.363462	1	1	DIXDC1/PINK1/MOAP1/TERF2IP/LIMCH1/ATP8A1/MAGI2/CAMK1/SMPD1/SCN1B/GPM6A/CLU/SCARB2/SLC25A4/ADD1	15
GO:0098771	inorganic ion homeostasis	9/180	496/11590	0.364785	1	1	NDFIP1/SLC22A17/FBXL5/ISCU/RGN/SLC4A4/PDK4/EDNRB/CLN5	9
GO:0006892	post-Golgi vesicle-mediated transport	2/180	82/11590	0.364853	1	1	VAMP2/BBS1	2
GO:2000060	positive regulation of ubiquitin-dependent protein catabolic process	2/180	82/11590	0.364853	1	1	GABARAP/CLU	2
GO:0000266	mitochondrial fission	1/180	29/11590	0.365219	1	1	PINK1	1
GO:0006378	mRNA polyadenylation	1/180	29/11590	0.365219	1	1	CPEB3	1
GO:0010874	regulation of cholesterol efflux	1/180	29/11590	0.365219	1	1	ABCA8	1
GO:0043267	negative regulation of potassium ion transport	1/180	29/11590	0.365219	1	1	KCNAB1	1
GO:0046320	regulation of fatty acid oxidation	1/180	29/11590	0.365219	1	1	PDK4	1
GO:0046825	regulation of protein export from nucleus	1/180	29/11590	0.365219	1	1	CAMK1	1
GO:0060306	regulation of membrane repolarization	1/180	29/11590	0.365219	1	1	SCN1B	1
GO:0090151	establishment of protein localization to mitochondrial membrane	1/180	29/11590	0.365219	1	1	MOAP1	1
GO:0016485	protein processing	4/180	197/11590	0.366284	1	1	APH1B/RPS6KA2/CPE/CLN5	4
GO:1901136	carbohydrate derivative catabolic process	3/180	139/11590	0.366771	1	1	PDE7B/PDE8B/PDE2A	3
GO:0007018	microtubule-based movement	5/180	257/11590	0.369399	1	1	ARMCX3/RGN/NME5/DLG2/BBS1	5
GO:0033500	carbohydrate homeostasis	4/180	198/11590	0.369819	1	1	KLF15/PTPRN2/PDK4/CRY2	4
GO:0042593	glucose homeostasis	4/180	198/11590	0.369819	1	1	KLF15/PTPRN2/PDK4/CRY2	4
GO:0043122	regulation of I-kappaB kinase/NF-kappaB signaling	4/180	198/11590	0.369819	1	1	NDFIP1/PINK1/TERF2IP/PER1	4
GO:1903320	regulation of protein modification by small protein conjugation or removal	4/180	198/11590	0.369819	1	1	NDFIP1/PINK1/GABARAP/FAM107A	4
GO:0051493	regulation of cytoskeleton organization	8/180	438/11590	0.371001	1	1	KANK3/DIXDC1/LIMCH1/FAM107A/MPDZ/S1PR1/ARHGAP6/ADD1	8
GO:0009725	response to hormone	13/180	744/11590	0.371043	1	1	CALCOCO1/VPS11/UFSP2/KLF15/WBP2/FAM107A/VAMP2/PER1/PDK4/NR3C2/EDNRB/CRY2/KLF9	13
GO:0031146	SCF-dependent proteasomal ubiquitin-dependent protein catabolic process	1/180	30/11590	0.375103	1	1	FBXL5	1
GO:0043631	RNA polyadenylation	1/180	30/11590	0.375103	1	1	CPEB3	1
GO:0045191	regulation of isotype switching	1/180	30/11590	0.375103	1	1	NDFIP1	1
GO:0050931	pigment cell differentiation	1/180	30/11590	0.375103	1	1	EDNRB	1
GO:0061384	heart trabecula morphogenesis	1/180	30/11590	0.375103	1	1	S1PR1	1
GO:0070266	necroptotic process	1/180	30/11590	0.375103	1	1	SLC25A4	1
GO:0086019	cell-cell signaling involved in cardiac conduction	1/180	30/11590	0.375103	1	1	SCN1B	1
GO:2000279	negative regulation of DNA biosynthetic process	1/180	30/11590	0.375103	1	1	RGN	1
GO:1904064	positive regulation of cation transmembrane transport	3/180	141/11590	0.375237	1	1	PINK1/RGN/KCNK3	3
GO:0051222	positive regulation of protein transport	5/180	259/11590	0.375583	1	1	PINK1/VPS11/CAMK1/VAMP2/APBB1	5
GO:0051591	response to cAMP	2/180	84/11590	0.376012	1	1	PER1/PDE2A	2
GO:0050801	ion homeostasis	9/180	502/11590	0.378118	1	1	NDFIP1/SLC22A17/FBXL5/ISCU/RGN/SLC4A4/PDK4/EDNRB/CLN5	9
GO:2001242	regulation of intrinsic apoptotic signaling pathway	3/180	142/11590	0.379462	1	1	PINK1/NME5/CLU	3
GO:0006165	nucleoside diphosphate phosphorylation	2/180	85/11590	0.381562	1	1	SLC4A4/NME5	2
GO:0042116	macrophage activation	2/180	85/11590	0.381562	1	1	PJA2/CLU	2
GO:0051952	regulation of amine transport	2/180	85/11590	0.381562	1	1	PINK1/ARL6IP5	2
GO:1901222	regulation of NIK/NF-kappaB signaling	2/180	85/11590	0.381562	1	1	TERF2IP/NR3C2	2
GO:1904659	glucose transmembrane transport	2/180	85/11590	0.381562	1	1	KLF15/CREBL2	2
GO:1905114	cell surface receptor signaling pathway involved in cell-cell signaling	8/180	443/11590	0.38286	1	1	DIXDC1/RNF146/CALCOCO1/PBXIP1/KLF15/MAGI2/EDNRB/CPE	8
GO:0048469	cell maturation	3/180	143/11590	0.383681	1	1	RPS6KA2/EDNRB/CLN5	3
GO:0098656	anion transmembrane transport	4/180	202/11590	0.383945	1	1	SLC25A42/ARL6IP5/SLC4A4/SLC25A4	4
GO:0051129	negative regulation of cellular component organization	10/180	566/11590	0.383987	1	1	KANK3/PINK1/TERF2IP/FAM107A/RPS6KA2/S1PR1/CLU/ARHGAP6/SLC25A4/ADD1	10
GO:0034655	nucleobase-containing compound catabolic process	6/180	322/11590	0.38414	1	1	PDE7B/CPEB3/RGN/PDE8B/PDE2A/CIRBP	6
GO:0010737	protein kinase A signaling	1/180	31/11590	0.384833	1	1	PJA2	1
GO:0032373	positive regulation of sterol transport	1/180	31/11590	0.384833	1	1	ABCA8	1
GO:0032376	positive regulation of cholesterol transport	1/180	31/11590	0.384833	1	1	ABCA8	1
GO:0035136	forelimb morphogenesis	1/180	31/11590	0.384833	1	1	ZBTB16	1
GO:0035329	hippo signaling	1/180	31/11590	0.384833	1	1	PJA2	1
GO:0070633	transepithelial transport	1/180	31/11590	0.384833	1	1	EDNRB	1
GO:0071168	protein localization to chromatin	1/180	31/11590	0.384833	1	1	WBP2	1
GO:0071398	cellular response to fatty acid	1/180	31/11590	0.384833	1	1	PDK4	1
GO:0003073	regulation of systemic arterial blood pressure	2/180	86/11590	0.387091	1	1	RPS6KA2/EDNRB	2
GO:0008645	hexose transmembrane transport	2/180	86/11590	0.387091	1	1	KLF15/CREBL2	2
GO:0009206	purine ribonucleoside triphosphate biosynthetic process	2/180	86/11590	0.387091	1	1	PINK1/NME5	2
GO:0034308	primary alcohol metabolic process	2/180	86/11590	0.387091	1	1	DHRS7/EDNRB	2
GO:0048259	regulation of receptor-mediated endocytosis	2/180	86/11590	0.387091	1	1	MAGI2/CLU	2
GO:0098660	inorganic ion transmembrane transport	12/180	691/11590	0.387382	1	1	ISCU/RGN/SLC4A4/KCNAB1/VAMP2/SCN1B/KCNK3/GPM6A/FHL1/EDNRB/COX7A1/SLC25A4	12
GO:0018105	peptidyl-serine phosphorylation	5/180	263/11590	0.387952	1	1	PINK1/TERF2IP/CAMK1/RPS6KA2/CREBL2	5
GO:0003205	cardiac chamber development	3/180	145/11590	0.3921	1	1	CRELD1/PDE2A/CPE	3
GO:0009145	purine nucleoside triphosphate biosynthetic process	2/180	87/11590	0.392598	1	1	PINK1/NME5	2
GO:0010906	regulation of glucose metabolic process	2/180	87/11590	0.392598	1	1	RGN/PDK4	2
GO:0015749	monosaccharide transmembrane transport	2/180	87/11590	0.392598	1	1	KLF15/CREBL2	2
GO:0042303	molting cycle	2/180	87/11590	0.392598	1	1	LDB2/PER1	2
GO:0042633	hair cycle	2/180	87/11590	0.392598	1	1	LDB2/PER1	2
GO:0046939	nucleotide phosphorylation	2/180	87/11590	0.392598	1	1	SLC4A4/NME5	2
GO:0010498	proteasomal protein catabolic process	7/180	386/11590	0.392784	1	1	UBXN6/PINK1/FBXL5/GABARAPL2/GABARAP/DNAJB9/CLU	7
GO:0002828	regulation of type 2 immune response	1/180	32/11590	0.394412	1	1	NDFIP1	1
GO:0009167	purine ribonucleoside monophosphate metabolic process	1/180	32/11590	0.394412	1	1	DLG2	1
GO:0016486	peptide hormone processing	1/180	32/11590	0.394412	1	1	CPE	1
GO:0035137	hindlimb morphogenesis	1/180	32/11590	0.394412	1	1	ZBTB16	1
GO:0038179	neurotrophin signaling pathway	1/180	32/11590	0.394412	1	1	MAGI2	1
GO:0043276	anoikis	1/180	32/11590	0.394412	1	1	PDK4	1
GO:0051693	actin filament capping	1/180	32/11590	0.394412	1	1	ADD1	1
GO:0051930	regulation of sensory perception of pain	1/180	32/11590	0.394412	1	1	EDNRB	1
GO:0051931	regulation of sensory perception	1/180	32/11590	0.394412	1	1	EDNRB	1
GO:1901381	positive regulation of potassium ion transmembrane transport	1/180	32/11590	0.394412	1	1	KCNK3	1
GO:1902229	regulation of intrinsic apoptotic signaling pathway in response to DNA damage	1/180	32/11590	0.394412	1	1	CLU	1
GO:0009060	aerobic respiration	3/180	146/11590	0.396299	1	1	PINK1/ISCU/COX7A1	3
GO:0007160	cell-matrix adhesion	4/180	206/11590	0.398037	1	1	TMEM8B/LIMCH1/FAM107A/ARHGAP6	4
GO:1901800	positive regulation of proteasomal protein catabolic process	2/180	88/11590	0.398084	1	1	GABARAP/CLU	2
GO:0001822	kidney development	5/180	267/11590	0.400308	1	1	KLF15/MAGI2/RGN/ZBTB16/EDNRB	5
GO:2000113	negative regulation of cellular macromolecule biosynthetic process	3/180	147/11590	0.400491	1	1	CPEB3/ITM2B/CIRBP	3
GO:0002027	regulation of heart rate	2/180	89/11590	0.403546	1	1	SCN1B/EDNRB	2
GO:0051224	negative regulation of protein transport	2/180	89/11590	0.403546	1	1	NDFIP1/SERGEF	2
GO:0007588	excretion	1/180	33/11590	0.403844	1	1	EDNRB	1
GO:0009395	phospholipid catabolic process	1/180	33/11590	0.403844	1	1	SMPD1	1
GO:0010907	positive regulation of glucose metabolic process	1/180	33/11590	0.403844	1	1	RGN	1
GO:0021955	central nervous system neuron axonogenesis	1/180	33/11590	0.403844	1	1	SCN1B	1
GO:0045601	regulation of endothelial cell differentiation	1/180	33/11590	0.403844	1	1	ADD1	1
GO:0045923	positive regulation of fatty acid metabolic process	1/180	33/11590	0.403844	1	1	RGN	1
GO:0062208	positive regulation of pattern recognition receptor signaling pathway	1/180	33/11590	0.403844	1	1	PJA2	1
GO:0086010	membrane depolarization during action potential	1/180	33/11590	0.403844	1	1	SCN1B	1
GO:0098801	regulation of renal system process	1/180	33/11590	0.403844	1	1	EDNRB	1
GO:0099622	cardiac muscle cell membrane repolarization	1/180	33/11590	0.403844	1	1	SCN1B	1
GO:1902003	regulation of amyloid-beta formation	1/180	33/11590	0.403844	1	1	CLU	1
GO:0019932	second-messenger-mediated signaling	5/180	269/11590	0.406478	1	1	PDE7B/RCAN2/RGN/PDE2A/EDNRB	5
GO:0070647	protein modification by small protein conjugation or removal	12/180	702/11590	0.408532	1	1	RNF146/NDFIP1/PINK1/AKTIP/VPS11/SERGEF/FBXL5/GABARAP/FAM107A/PJA2/ZBTB16/TRIM23	12
GO:0006766	vitamin metabolic process	2/180	90/11590	0.408985	1	1	RGN/BTD	2
GO:0008630	intrinsic apoptotic signaling pathway in response to DNA damage	2/180	90/11590	0.408985	1	1	MOAP1/CLU	2
GO:0009201	ribonucleoside triphosphate biosynthetic process	2/180	90/11590	0.408985	1	1	PINK1/NME5	2
GO:0070252	actin-mediated cell contraction	2/180	90/11590	0.408985	1	1	LIMCH1/SCN1B	2
GO:0016050	vesicle organization	5/180	270/11590	0.409561	1	1	AKTIP/VPS11/STX12/VAMP2/SCARB2	5
GO:0034249	negative regulation of cellular amide metabolic process	3/180	150/11590	0.413016	1	1	CPEB3/CLU/CIRBP	3
GO:0043123	positive regulation of I-kappaB kinase/NF-kappaB signaling	3/180	150/11590	0.413016	1	1	NDFIP1/PINK1/TERF2IP	3
GO:0099111	microtubule-based transport	3/180	150/11590	0.413016	1	1	ARMCX3/NME5/DLG2	3
GO:0006904	vesicle docking involved in exocytosis	1/180	34/11590	0.413129	1	1	VPS11	1
GO:0009126	purine nucleoside monophosphate metabolic process	1/180	34/11590	0.413129	1	1	DLG2	1
GO:0031063	regulation of histone deacetylation	1/180	34/11590	0.413129	1	1	PINK1	1
GO:0045429	positive regulation of nitric oxide biosynthetic process	1/180	34/11590	0.413129	1	1	CLU	1
GO:0046640	regulation of alpha-beta T cell proliferation	1/180	34/11590	0.413129	1	1	NDFIP1	1
GO:0050869	negative regulation of B cell activation	1/180	34/11590	0.413129	1	1	NDFIP1	1
GO:0071985	multivesicular body sorting pathway	1/180	34/11590	0.413129	1	1	UBXN6	1
GO:0140448	signaling receptor ligand precursor processing	1/180	34/11590	0.413129	1	1	CPE	1
GO:1902116	negative regulation of organelle assembly	1/180	34/11590	0.413129	1	1	PINK1	1
GO:1990000	amyloid fibril formation	1/180	34/11590	0.413129	1	1	CLU	1
GO:0003279	cardiac septum development	2/180	91/11590	0.4144	1	1	CRELD1/PDE2A	2
GO:0009135	purine nucleoside diphosphate metabolic process	2/180	91/11590	0.4144	1	1	SLC4A4/DLG2	2
GO:0009179	purine ribonucleoside diphosphate metabolic process	2/180	91/11590	0.4144	1	1	SLC4A4/DLG2	2
GO:0033865	nucleoside bisphosphate metabolic process	2/180	91/11590	0.4144	1	1	ACSM5/PDK4	2
GO:0033875	ribonucleoside bisphosphate metabolic process	2/180	91/11590	0.4144	1	1	ACSM5/PDK4	2
GO:0034032	purine nucleoside bisphosphate metabolic process	2/180	91/11590	0.4144	1	1	ACSM5/PDK4	2
GO:1905954	positive regulation of lipid localization	2/180	91/11590	0.4144	1	1	ATP8A1/ABCA8	2
GO:0043087	regulation of GTPase activity	5/180	272/11590	0.415719	1	1	PBXIP1/CCPG1/RGN/S1PR1/ARHGAP6	5
GO:0072001	renal system development	5/180	272/11590	0.415719	1	1	KLF15/MAGI2/RGN/ZBTB16/EDNRB	5
GO:1904951	positive regulation of establishment of protein localization	5/180	272/11590	0.415719	1	1	PINK1/VPS11/CAMK1/VAMP2/APBB1	5
GO:0007200	phospholipase C-activating G protein-coupled receptor signaling pathway	2/180	92/11590	0.419791	1	1	EDNRB/S1PR1	2
GO:0015837	amine transport	2/180	92/11590	0.419791	1	1	PINK1/ARL6IP5	2
GO:0030004	cellular monovalent inorganic cation homeostasis	2/180	92/11590	0.419791	1	1	SLC4A4/CLN5	2
GO:0051051	negative regulation of transport	6/180	335/11590	0.42032	1	1	NDFIP1/SERGEF/ISCU/ARL6IP5/KCNAB1/CRY2	6
GO:0022411	cellular component disassembly	7/180	397/11590	0.420902	1	1	PINK1/PBXIP1/GABARAPL1/GABARAPL2/GABARAP/SLC25A4/ADD1	7
GO:0018209	peptidyl-serine modification	5/180	274/11590	0.421868	1	1	PINK1/TERF2IP/CAMK1/RPS6KA2/CREBL2	5
GO:0001662	behavioral fear response	1/180	35/11590	0.42227	1	1	PDE8B	1
GO:0007617	mating behavior	1/180	35/11590	0.42227	1	1	EDNRB	1
GO:0008089	anterograde axonal transport	1/180	35/11590	0.42227	1	1	DLG2	1
GO:0010559	regulation of glycoprotein biosynthetic process	1/180	35/11590	0.42227	1	1	ITM2B	1
GO:0010837	regulation of keratinocyte proliferation	1/180	35/11590	0.42227	1	1	KLF9	1
GO:0010939	regulation of necrotic cell death	1/180	35/11590	0.42227	1	1	SLC25A4	1
GO:0030835	negative regulation of actin filament depolymerization	1/180	35/11590	0.42227	1	1	ADD1	1
GO:0032350	regulation of hormone metabolic process	1/180	35/11590	0.42227	1	1	PDE8B	1
GO:0032924	activin receptor signaling pathway	1/180	35/11590	0.42227	1	1	MAGI2	1
GO:0048246	macrophage chemotaxis	1/180	35/11590	0.42227	1	1	EDNRB	1
GO:0097242	amyloid-beta clearance	1/180	35/11590	0.42227	1	1	CLU	1
GO:1904407	positive regulation of nitric oxide metabolic process	1/180	35/11590	0.42227	1	1	CLU	1
GO:2000008	regulation of protein localization to cell surface	1/180	35/11590	0.42227	1	1	RIC3	1
GO:0006639	acylglycerol metabolic process	2/180	93/11590	0.425156	1	1	LMF1/RGN	2
GO:0019395	fatty acid oxidation	2/180	93/11590	0.425156	1	1	PDK4/IVD	2
GO:0034728	nucleosome organization	2/180	93/11590	0.425156	1	1	TSPYL1/NAP1L2	2
GO:0046634	regulation of alpha-beta T cell activation	2/180	93/11590	0.425156	1	1	NDFIP1/ZBTB16	2
GO:1903313	positive regulation of mRNA metabolic process	2/180	93/11590	0.425156	1	1	CPEB3/CIRBP	2
GO:1904950	negative regulation of establishment of protein localization	2/180	93/11590	0.425156	1	1	NDFIP1/SERGEF	2
GO:0034767	positive regulation of ion transmembrane transport	3/180	153/11590	0.42546	1	1	PINK1/RGN/KCNK3	3
GO:2000241	regulation of reproductive process	3/180	153/11590	0.42546	1	1	RGN/RPS6KA2/EDNRB	3
GO:0006898	receptor-mediated endocytosis	4/180	214/11590	0.426051	1	1	LMBRD1/MAGI2/CLU/SCARB2	4
GO:0015850	organic hydroxy compound transport	4/180	214/11590	0.426051	1	1	PINK1/STX12/ABCA8/CLU	4
GO:1902806	regulation of cell cycle G1/S phase transition	3/180	154/11590	0.429589	1	1	FAM107A/FHL1/APBB1	3
GO:0002526	acute inflammatory response	2/180	94/11590	0.430496	1	1	F8/EDNRB	2
GO:0006638	neutral lipid metabolic process	2/180	94/11590	0.430496	1	1	LMF1/RGN	2
GO:0035967	cellular response to topologically incorrect protein	2/180	94/11590	0.430496	1	1	PACRG/DNAJB9	2
GO:0002209	behavioral defense response	1/180	36/11590	0.43127	1	1	PDE8B	1
GO:0032570	response to progesterone	1/180	36/11590	0.43127	1	1	WBP2	1
GO:0042092	type 2 immune response	1/180	36/11590	0.43127	1	1	NDFIP1	1
GO:0043124	negative regulation of I-kappaB kinase/NF-kappaB signaling	1/180	36/11590	0.43127	1	1	PER1	1
GO:0045332	phospholipid translocation	1/180	36/11590	0.43127	1	1	ATP8A1	1
GO:0046636	negative regulation of alpha-beta T cell activation	1/180	36/11590	0.43127	1	1	NDFIP1	1
GO:0050885	neuromuscular process controlling balance	1/180	36/11590	0.43127	1	1	PDE8B	1
GO:0086091	regulation of heart rate by cardiac conduction	1/180	36/11590	0.43127	1	1	SCN1B	1
GO:0097300	programmed necrotic cell death	1/180	36/11590	0.43127	1	1	SLC25A4	1
GO:1901021	positive regulation of calcium ion transmembrane transporter activity	1/180	36/11590	0.43127	1	1	RGN	1
GO:0051099	positive regulation of binding	3/180	155/11590	0.433707	1	1	AKTIP/CLN5/ADD1	3
GO:1901135	carbohydrate derivative metabolic process	14/180	842/11590	0.435671	1	1	PINK1/ACSM5/CRYL1/PDE7B/ITM2B/SLC4A4/PDE8B/NME5/TK2/SMPD1/PDK4/PDE2A/EDNRB/DLG2	14
GO:0006939	smooth muscle contraction	2/180	95/11590	0.435809	1	1	EDNRB/APBB1	2
GO:0034219	carbohydrate transmembrane transport	2/180	95/11590	0.435809	1	1	KLF15/CREBL2	2
GO:0032386	regulation of intracellular transport	5/180	279/11590	0.43719	1	1	PINK1/VPS11/CAMK1/REEP5/VAMP2	5
GO:0001774	microglial cell activation	1/180	37/11590	0.44013	1	1	CLU	1
GO:0001937	negative regulation of endothelial cell proliferation	1/180	37/11590	0.44013	1	1	PTPRM	1
GO:0006958	complement activation, classical pathway	1/180	37/11590	0.44013	1	1	CLU	1
GO:0008207	C21-steroid hormone metabolic process	1/180	37/11590	0.44013	1	1	EDNRB	1
GO:0009124	nucleoside monophosphate biosynthetic process	1/180	37/11590	0.44013	1	1	TK2	1
GO:0010659	cardiac muscle cell apoptotic process	1/180	37/11590	0.44013	1	1	RPS6KA2	1
GO:0010863	positive regulation of phospholipase C activity	1/180	37/11590	0.44013	1	1	ARHGAP6	1
GO:0016233	telomere capping	1/180	37/11590	0.44013	1	1	TERF2IP	1
GO:0016601	Rac protein signal transduction	1/180	37/11590	0.44013	1	1	GABARAP	1
GO:0046633	alpha-beta T cell proliferation	1/180	37/11590	0.44013	1	1	NDFIP1	1
GO:0006476	protein deacetylation	2/180	96/11590	0.441096	1	1	PINK1/PER1	2
GO:0042391	regulation of membrane potential	6/180	343/11590	0.442477	1	1	PINK1/ARL6IP5/SLC4A4/SCN1B/KCNK3/FHL1	6
GO:0001894	tissue homeostasis	4/180	219/11590	0.443401	1	1	LDB2/PDK4/S1PR1/BBS1	4
GO:0006643	membrane lipid metabolic process	3/180	158/11590	0.445995	1	1	SERINC1/ABCA8/SMPD1	3
GO:0048167	regulation of synaptic plasticity	3/180	158/11590	0.445995	1	1	CPEB3/FAM107A/VAMP2	3
GO:0009142	nucleoside triphosphate biosynthetic process	2/180	97/11590	0.446356	1	1	PINK1/NME5	2
GO:0008542	visual learning	1/180	38/11590	0.448853	1	1	PDE8B	1
GO:0014003	oligodendrocyte development	1/180	38/11590	0.448853	1	1	CLU	1
GO:0021795	cerebral cortex cell migration	1/180	38/11590	0.448853	1	1	DIXDC1	1
GO:0031057	negative regulation of histone modification	1/180	38/11590	0.448853	1	1	PHF1	1
GO:0035384	thioester biosynthetic process	1/180	38/11590	0.448853	1	1	PDK4	1
GO:0042908	xenobiotic transport	1/180	38/11590	0.448853	1	1	ABCA8	1
GO:0044060	regulation of endocrine process	1/180	38/11590	0.448853	1	1	CRY2	1
GO:0046596	regulation of viral entry into host cell	1/180	38/11590	0.448853	1	1	SMPD1	1
GO:0051898	negative regulation of protein kinase B signaling	1/180	38/11590	0.448853	1	1	MAGI2	1
GO:0071616	acyl-CoA biosynthetic process	1/180	38/11590	0.448853	1	1	PDK4	1
GO:0097479	synaptic vesicle localization	1/180	38/11590	0.448853	1	1	PINK1	1
GO:1900271	regulation of long-term synaptic potentiation	1/180	38/11590	0.448853	1	1	FAM107A	1
GO:1905953	negative regulation of lipid localization	1/180	38/11590	0.448853	1	1	CRY2	1
GO:0045664	regulation of neuron differentiation	3/180	159/11590	0.450068	1	1	DIXDC1/NAP1L2/EDNRB	3
GO:0006518	peptide metabolic process	11/180	661/11590	0.45133	1	1	APH1B/PINK1/HABP4/CPEB3/ARL6IP5/SECISBP2L/PER1/CPE/CLN5/CLU/CIRBP	11
GO:0002761	regulation of myeloid leukocyte differentiation	2/180	98/11590	0.451588	1	1	NDFIP1/TCTA	2
GO:0021987	cerebral cortex development	2/180	98/11590	0.451588	1	1	DIXDC1/BBS1	2
GO:0034440	lipid oxidation	2/180	98/11590	0.451588	1	1	PDK4/IVD	2
GO:0071482	cellular response to light stimulus	2/180	98/11590	0.451588	1	1	SMPD1/CRY2	2
GO:0032787	monocarboxylic acid metabolic process	8/180	472/11590	0.451747	1	1	ACBD4/ACSM5/CRYL1/RGN/SLC4A4/PDK4/IVD/BTD	8
GO:0032271	regulation of protein polymerization	3/180	160/11590	0.454129	1	1	KANK3/PINK1/ADD1	3
GO:0045637	regulation of myeloid cell differentiation	3/180	160/11590	0.454129	1	1	NDFIP1/ZBTB16/TCTA	3
GO:0070925	organelle assembly	11/180	663/11590	0.45535	1	1	TXNDC15/PINK1/MOAP1/VPS11/GABARAPL1/STX12/GABARAPL2/GABARAP/NME5/CIRBP/BBS1	11
GO:0010876	lipid localization	6/180	348/11590	0.456247	1	1	STX12/ATP8A1/ABCA8/CRY2/CLU/SCARB2	6
GO:0090407	organophosphate biosynthetic process	8/180	474/11590	0.456473	1	1	PINK1/SERINC1/CRYL1/ABCA8/NME5/TK2/PDK4/MOCS2	8
GO:0007613	memory	2/180	99/11590	0.456793	1	1	CPEB3/PJA2	2
GO:0009185	ribonucleoside diphosphate metabolic process	2/180	99/11590	0.456793	1	1	SLC4A4/DLG2	2
GO:0010658	striated muscle cell apoptotic process	1/180	39/11590	0.457441	1	1	RPS6KA2	1
GO:0042461	photoreceptor cell development	1/180	39/11590	0.457441	1	1	BBS1	1
GO:0042572	retinol metabolic process	1/180	39/11590	0.457441	1	1	DHRS7	1
GO:0051954	positive regulation of amine transport	1/180	39/11590	0.457441	1	1	PINK1	1
GO:1900274	regulation of phospholipase C activity	1/180	39/11590	0.457441	1	1	ARHGAP6	1
GO:1902991	regulation of amyloid precursor protein catabolic process	1/180	39/11590	0.457441	1	1	CLU	1
GO:2001258	negative regulation of cation channel activity	1/180	39/11590	0.457441	1	1	KCNAB1	1
GO:1901888	regulation of cell junction assembly	3/180	161/11590	0.458178	1	1	LIMCH1/FAM107A/ARHGAP6	3
GO:1902115	regulation of organelle assembly	3/180	161/11590	0.458178	1	1	PINK1/MOAP1/VPS11	3
GO:0006511	ubiquitin-dependent protein catabolic process	8/180	475/11590	0.458834	1	1	RNF146/NDFIP1/PINK1/SERGEF/FBXL5/GABARAP/DNAJB9/CLU	8
GO:0051223	regulation of protein transport	7/180	412/11590	0.459048	1	1	NDFIP1/PINK1/VPS11/SERGEF/CAMK1/VAMP2/APBB1	7
GO:0006090	pyruvate metabolic process	2/180	100/11590	0.461969	1	1	SLC4A4/PDK4	2
GO:0072329	monocarboxylic acid catabolic process	2/180	100/11590	0.461969	1	1	CRYL1/IVD	2
GO:0071897	DNA biosynthetic process	3/180	162/11590	0.462214	1	1	TERF2IP/RGN/TK2	3
GO:0032868	response to insulin	4/180	225/11590	0.464012	1	1	KLF15/VAMP2/PDK4/CRY2	4
GO:0010256	endomembrane system organization	7/180	414/11590	0.464101	1	1	AKTIP/VPS11/SYNE1/REEP5/SMPD1/CLU/SCARB2	7
GO:0046700	heterocycle catabolic process	6/180	351/11590	0.464474	1	1	PDE7B/CPEB3/RGN/PDE8B/PDE2A/CIRBP	6
GO:0002269	leukocyte activation involved in inflammatory response	1/180	40/11590	0.465896	1	1	CLU	1
GO:0002673	regulation of acute inflammatory response	1/180	40/11590	0.465896	1	1	EDNRB	1
GO:0006220	pyrimidine nucleotide metabolic process	1/180	40/11590	0.465896	1	1	NME5	1
GO:0015872	dopamine transport	1/180	40/11590	0.465896	1	1	PINK1	1
GO:0031062	positive regulation of histone methylation	1/180	40/11590	0.465896	1	1	PHF1	1
GO:0032968	positive regulation of transcription elongation by RNA polymerase II	1/180	40/11590	0.465896	1	1	CBX7	1
GO:0034204	lipid translocation	1/180	40/11590	0.465896	1	1	ATP8A1	1
GO:0042743	hydrogen peroxide metabolic process	1/180	40/11590	0.465896	1	1	PINK1	1
GO:0051349	positive regulation of lyase activity	1/180	40/11590	0.465896	1	1	ISCU	1
GO:0051955	regulation of amino acid transport	1/180	40/11590	0.465896	1	1	ARL6IP5	1
GO:0060071	Wnt signaling pathway, planar cell polarity pathway	1/180	40/11590	0.465896	1	1	MAGI2	1
GO:0061647	histone H3-K9 modification	1/180	40/11590	0.465896	1	1	NAP1L2	1
GO:0090102	cochlea development	1/180	40/11590	0.465896	1	1	KCNK3	1
GO:0097035	regulation of membrane lipid distribution	1/180	40/11590	0.465896	1	1	ATP8A1	1
GO:1903018	regulation of glycoprotein metabolic process	1/180	40/11590	0.465896	1	1	ITM2B	1
GO:2000378	negative regulation of reactive oxygen species metabolic process	1/180	40/11590	0.465896	1	1	PINK1	1
GO:0000122	negative regulation of transcription by RNA polymerase II	12/180	732/11590	0.466326	1	1	MAGEH1/EID1/CBX7/CPEB3/LDB2/ZBTB16/POU6F1/PER1/PDE2A/EDNRB/CRY2/APBB1	12
GO:1902532	negative regulation of intracellular signal transduction	7/180	415/11590	0.466624	1	1	PINK1/MAGI2/NME5/SMPD1/PER1/PDE2A/CLU	7
GO:0000018	regulation of DNA recombination	2/180	101/11590	0.467116	1	1	NDFIP1/TERF2IP	2
GO:0010952	positive regulation of peptidase activity	3/180	164/11590	0.470248	1	1	APH1B/PINK1/ARL6IP5	3
GO:0030100	regulation of endocytosis	3/180	164/11590	0.470248	1	1	MAGI2/SMPD1/CLU	3
GO:0031623	receptor internalization	2/180	102/11590	0.472235	1	1	LMBRD1/MAGI2	2
GO:0035601	protein deacylation	2/180	102/11590	0.472235	1	1	PINK1/PER1	2
GO:0098732	macromolecule deacylation	2/180	102/11590	0.472235	1	1	PINK1/PER1	2
GO:0010043	response to zinc ion	1/180	41/11590	0.474219	1	1	KCNK3	1
GO:0014888	striated muscle adaptation	1/180	41/11590	0.474219	1	1	KLF15	1
GO:0036230	granulocyte activation	1/180	41/11590	0.474219	1	1	VAMP2	1
GO:0042596	fear response	1/180	41/11590	0.474219	1	1	PDE8B	1
GO:0048066	developmental pigmentation	1/180	41/11590	0.474219	1	1	EDNRB	1
GO:0051438	regulation of ubiquitin-protein transferase activity	1/180	41/11590	0.474219	1	1	PINK1	1
GO:0051646	mitochondrion localization	1/180	41/11590	0.474219	1	1	ARMCX3	1
GO:0086009	membrane repolarization	1/180	41/11590	0.474219	1	1	SCN1B	1
GO:1901799	negative regulation of proteasomal protein catabolic process	1/180	41/11590	0.474219	1	1	GABARAPL2	1
GO:0014070	response to organic cyclic compound	13/180	800/11590	0.474499	1	1	CALCOCO1/VPS11/UFSP2/WBP2/FAM107A/ARL6IP5/SMPD1/PER1/PDE2A/NR3C2/EDNRB/CRY2/KLF9	13
GO:0044270	cellular nitrogen compound catabolic process	6/180	355/11590	0.475393	1	1	PDE7B/CPEB3/RGN/PDE8B/PDE2A/CIRBP	6
GO:0031329	regulation of cellular catabolic process	10/180	612/11590	0.481036	1	1	PINK1/MOAP1/CPEB3/GABARAP/RGN/SLC4A4/CLU/CIRBP/SCARB2/SLC25A4	10
GO:0072330	monocarboxylic acid biosynthetic process	3/180	167/11590	0.482198	1	1	ACSM5/RGN/PDK4	3
GO:0019941	modification-dependent protein catabolic process	8/180	485/11590	0.482328	1	1	RNF146/NDFIP1/PINK1/SERGEF/FBXL5/GABARAP/DNAJB9/CLU	8
GO:0002377	immunoglobulin production	2/180	104/11590	0.482382	1	1	NDFIP1/DNAJB9	2
GO:0007286	spermatid development	2/180	104/11590	0.482382	1	1	PACRG/NME5	2
GO:0030278	regulation of ossification	2/180	104/11590	0.482382	1	1	ZBTB16/S1PR1	2
GO:0002762	negative regulation of myeloid leukocyte differentiation	1/180	42/11590	0.482414	1	1	TCTA	1
GO:0019098	reproductive behavior	1/180	42/11590	0.482414	1	1	EDNRB	1
GO:0021695	cerebellar cortex development	1/180	42/11590	0.482414	1	1	DIXDC1	1
GO:0030834	regulation of actin filament depolymerization	1/180	42/11590	0.482414	1	1	ADD1	1
GO:0031124	mRNA 3'-end processing	1/180	42/11590	0.482414	1	1	CPEB3	1
GO:0045197	establishment or maintenance of epithelial cell apical/basal polarity	1/180	42/11590	0.482414	1	1	DLG2	1
GO:0048483	autonomic nervous system development	1/180	42/11590	0.482414	1	1	EDNRB	1
GO:0051452	intracellular pH reduction	1/180	42/11590	0.482414	1	1	CLN5	1
GO:0090175	regulation of establishment of planar polarity	1/180	42/11590	0.482414	1	1	MAGI2	1
GO:1990090	cellular response to nerve growth factor stimulus	1/180	42/11590	0.482414	1	1	MAGI2	1
GO:0046467	membrane lipid biosynthetic process	2/180	105/11590	0.487412	1	1	ABCA8/SMPD1	2
GO:0002204	somatic recombination of immunoglobulin genes involved in immune response	1/180	43/11590	0.490482	1	1	NDFIP1	1
GO:0002208	somatic diversification of immunoglobulins involved in immune response	1/180	43/11590	0.490482	1	1	NDFIP1	1
GO:0003197	endocardial cushion development	1/180	43/11590	0.490482	1	1	CRELD1	1
GO:0006749	glutathione metabolic process	1/180	43/11590	0.490482	1	1	ARL6IP5	1
GO:0007632	visual behavior	1/180	43/11590	0.490482	1	1	PDE8B	1
GO:0032330	regulation of chondrocyte differentiation	1/180	43/11590	0.490482	1	1	ZBTB16	1
GO:0043616	keratinocyte proliferation	1/180	43/11590	0.490482	1	1	KLF9	1
GO:0045190	isotype switching	1/180	43/11590	0.490482	1	1	NDFIP1	1
GO:0061383	trabecula morphogenesis	1/180	43/11590	0.490482	1	1	S1PR1	1
GO:0061900	glial cell activation	1/180	43/11590	0.490482	1	1	CLU	1
GO:0099601	regulation of neurotransmitter receptor activity	1/180	43/11590	0.490482	1	1	PINK1	1
GO:0140353	lipid export from cell	1/180	43/11590	0.490482	1	1	CRY2	1
GO:2000273	positive regulation of signaling receptor activity	1/180	43/11590	0.490482	1	1	PINK1	1
GO:2000649	regulation of sodium ion transmembrane transporter activity	1/180	43/11590	0.490482	1	1	SCN1B	1
GO:0009165	nucleotide biosynthetic process	4/180	233/11590	0.49107	1	1	PINK1/NME5/TK2/PDK4	4
GO:0031032	actomyosin structure organization	3/180	170/11590	0.49402	1	1	LIMCH1/S1PR1/ARHGAP6	3
GO:0043393	regulation of protein binding	3/180	170/11590	0.49402	1	1	AKTIP/CAMK1/ADD1	3
GO:1901293	nucleoside phosphate biosynthetic process	4/180	234/11590	0.494414	1	1	PINK1/NME5/TK2/PDK4	4
GO:0003231	cardiac ventricle development	2/180	107/11590	0.497378	1	1	PDE2A/CPE	2
GO:0010565	regulation of cellular ketone metabolic process	2/180	107/11590	0.497378	1	1	RGN/PDK4	2
GO:0030833	regulation of actin filament polymerization	2/180	107/11590	0.497378	1	1	KANK3/ADD1	2
GO:0002090	regulation of receptor internalization	1/180	44/11590	0.498424	1	1	MAGI2	1
GO:0002701	negative regulation of production of molecular mediator of immune response	1/180	44/11590	0.498424	1	1	NDFIP1	1
GO:0006110	regulation of glycolytic process	1/180	44/11590	0.498424	1	1	SLC4A4	1
GO:0009409	response to cold	1/180	44/11590	0.498424	1	1	CIRBP	1
GO:0034332	adherens junction organization	1/180	44/11590	0.498424	1	1	ADD1	1
GO:0042220	response to cocaine	1/180	44/11590	0.498424	1	1	SMPD1	1
GO:0051445	regulation of meiotic cell cycle	1/180	44/11590	0.498424	1	1	RPS6KA2	1
GO:0051489	regulation of filopodium assembly	1/180	44/11590	0.498424	1	1	GPM6A	1
GO:0052372	modulation by symbiont of entry into host	1/180	44/11590	0.498424	1	1	SMPD1	1
GO:0097120	receptor localization to synapse	1/180	44/11590	0.498424	1	1	DLG2	1
GO:1990089	response to nerve growth factor	1/180	44/11590	0.498424	1	1	MAGI2	1
GO:0043632	modification-dependent macromolecule catabolic process	8/180	492/11590	0.49863	1	1	RNF146/NDFIP1/PINK1/SERGEF/FBXL5/GABARAP/DNAJB9/CLU	8
GO:0044255	cellular lipid metabolic process	12/180	749/11590	0.498806	1	1	ACBD4/LMF1/SERINC1/ACSM5/DHRS7/CRYL1/ABCA8/RGN/SMPD1/PDK4/IVD/BBS1	12
GO:0051216	cartilage development	3/180	172/11590	0.501828	1	1	PBXIP1/ZBTB16/BBS1	3
GO:0038061	NIK/NF-kappaB signaling	2/180	108/11590	0.502316	1	1	TERF2IP/NR3C2	2
GO:0045598	regulation of fat cell differentiation	2/180	108/11590	0.502316	1	1	ZBTB16/CREBL2	2
GO:0010562	positive regulation of phosphorus metabolic process	12/180	751/11590	0.502602	1	1	PINK1/AKTIP/TERF2IP/LIMCH1/MAGI2/RGN/SLC4A4/CAMK1/SMPD1/EDNRB/CREBL2/CLU	12
GO:0045937	positive regulation of phosphate metabolic process	12/180	751/11590	0.502602	1	1	PINK1/AKTIP/TERF2IP/LIMCH1/MAGI2/RGN/SLC4A4/CAMK1/SMPD1/EDNRB/CREBL2/CLU	12
GO:0044087	regulation of cellular component biogenesis	12/180	752/11590	0.504497	1	1	KANK3/PINK1/MOAP1/VPS11/LIMCH1/FAM107A/LDB2/GPM6A/S1PR1/CLU/ARHGAP6/ADD1	12
GO:0002639	positive regulation of immunoglobulin production	1/180	45/11590	0.506244	1	1	DNAJB9	1
GO:0015695	organic cation transport	1/180	45/11590	0.506244	1	1	SLC25A42	1
GO:0032371	regulation of sterol transport	1/180	45/11590	0.506244	1	1	ABCA8	1
GO:0032374	regulation of cholesterol transport	1/180	45/11590	0.506244	1	1	ABCA8	1
GO:0035088	establishment or maintenance of apical/basal cell polarity	1/180	45/11590	0.506244	1	1	DLG2	1
GO:0042733	embryonic digit morphogenesis	1/180	45/11590	0.506244	1	1	ZBTB16	1
GO:0043114	regulation of vascular permeability	1/180	45/11590	0.506244	1	1	PDE2A	1
GO:0043392	negative regulation of DNA binding	1/180	45/11590	0.506244	1	1	HABP4	1
GO:0045744	negative regulation of G protein-coupled receptor signaling pathway	1/180	45/11590	0.506244	1	1	GPRASP1	1
GO:0061245	establishment or maintenance of bipolar cell polarity	1/180	45/11590	0.506244	1	1	DLG2	1
GO:0089718	amino acid import across plasma membrane	1/180	45/11590	0.506244	1	1	ARL6IP5	1
GO:1905515	non-motile cilium assembly	1/180	45/11590	0.506244	1	1	BBS1	1
GO:0043065	positive regulation of apoptotic process	7/180	431/11590	0.506574	1	1	MOAP1/ARL6IP5/ZBTB16/SMPD1/RPS6KA2/CLU/APBB1	7
GO:0032434	regulation of proteasomal ubiquitin-dependent protein catabolic process	2/180	109/11590	0.507222	1	1	GABARAP/CLU	2
GO:0048515	spermatid differentiation	2/180	109/11590	0.507222	1	1	PACRG/NME5	2
GO:0070201	regulation of establishment of protein localization	7/180	433/11590	0.511504	1	1	NDFIP1/PINK1/VPS11/SERGEF/CAMK1/VAMP2/APBB1	7
GO:0006986	response to unfolded protein	2/180	110/11590	0.512097	1	1	PACRG/DNAJB9	2
GO:0008643	carbohydrate transport	2/180	110/11590	0.512097	1	1	KLF15/CREBL2	2
GO:0050684	regulation of mRNA processing	2/180	110/11590	0.512097	1	1	CPEB3/CIRBP	2
GO:0019439	aromatic compound catabolic process	6/180	369/11590	0.51308	1	1	PDE7B/CPEB3/RGN/PDE8B/PDE2A/CIRBP	6
GO:0009152	purine ribonucleotide biosynthetic process	3/180	175/11590	0.513424	1	1	PINK1/NME5/PDK4	3
GO:0019722	calcium-mediated signaling	3/180	175/11590	0.513424	1	1	RCAN2/RGN/EDNRB	3
GO:0002534	cytokine production involved in inflammatory response	1/180	46/11590	0.513942	1	1	PER1	1
GO:0009161	ribonucleoside monophosphate metabolic process	1/180	46/11590	0.513942	1	1	DLG2	1
GO:0014009	glial cell proliferation	1/180	46/11590	0.513942	1	1	CLU	1
GO:0030042	actin filament depolymerization	1/180	46/11590	0.513942	1	1	ADD1	1
GO:0042311	vasodilation	1/180	46/11590	0.513942	1	1	EDNRB	1
GO:0046638	positive regulation of alpha-beta T cell differentiation	1/180	46/11590	0.513942	1	1	ZBTB16	1
GO:0048255	mRNA stabilization	1/180	46/11590	0.513942	1	1	CIRBP	1
GO:0048599	oocyte development	1/180	46/11590	0.513942	1	1	RPS6KA2	1
GO:0051055	negative regulation of lipid biosynthetic process	1/180	46/11590	0.513942	1	1	PDE8B	1
GO:1900015	regulation of cytokine production involved in inflammatory response	1/180	46/11590	0.513942	1	1	PER1	1
GO:0061024	membrane organization	10/180	628/11590	0.51425	1	1	PINK1/MOAP1/VPS11/STX12/ATP8A1/REEP5/VAMP2/SMPD1/CLU/SLC25A4	10
GO:0042180	cellular ketone metabolic process	3/180	176/11590	0.517258	1	1	RGN/PDK4/EDNRB	3
GO:0045333	cellular respiration	3/180	176/11590	0.517258	1	1	PINK1/ISCU/COX7A1	3
GO:0009314	response to radiation	6/180	371/11590	0.518386	1	1	PDE8B/SMPD1/MAPK10/PER1/CRY2/CIRBP	6
GO:0002931	response to ischemia	1/180	47/11590	0.521521	1	1	PINK1	1
GO:0009994	oocyte differentiation	1/180	47/11590	0.521521	1	1	RPS6KA2	1
GO:0010676	positive regulation of cellular carbohydrate metabolic process	1/180	47/11590	0.521521	1	1	RGN	1
GO:0035773	insulin secretion involved in cellular response to glucose stimulus	1/180	47/11590	0.521521	1	1	PTPRN2	1
GO:0043030	regulation of macrophage activation	1/180	47/11590	0.521521	1	1	PJA2	1
GO:0046513	ceramide biosynthetic process	1/180	47/11590	0.521521	1	1	SMPD1	1
GO:0050433	regulation of catecholamine secretion	1/180	47/11590	0.521521	1	1	PINK1	1
GO:0061512	protein localization to cilium	1/180	47/11590	0.521521	1	1	BBS1	1
GO:0086002	cardiac muscle cell action potential involved in contraction	1/180	47/11590	0.521521	1	1	SCN1B	1
GO:0010817	regulation of hormone levels	7/180	438/11590	0.523753	1	1	DHRS7/PDE8B/PTPRN2/EDNRB/CRY2/CPE/BBS1	7
GO:0030111	regulation of Wnt signaling pathway	4/180	243/11590	0.524083	1	1	DIXDC1/RNF146/PBXIP1/KLF15	4
GO:0003018	vascular process in circulatory system	4/180	244/11590	0.52733	1	1	ATP8A1/SLC4A4/PDE2A/EDNRB	4
GO:0044262	cellular carbohydrate metabolic process	4/180	244/11590	0.52733	1	1	GABARAPL1/RGN/PDK4/SCARB2	4
GO:0000209	protein polyubiquitination	3/180	179/11590	0.528664	1	1	RNF146/AKTIP/GABARAP	3
GO:0000288	nuclear-transcribed mRNA catabolic process, deadenylation-dependent decay	1/180	48/11590	0.528982	1	1	CPEB3	1
GO:0002707	negative regulation of lymphocyte mediated immunity	1/180	48/11590	0.528982	1	1	NDFIP1	1
GO:0010596	negative regulation of endothelial cell migration	1/180	48/11590	0.528982	1	1	PTPRM	1
GO:0043489	RNA stabilization	1/180	48/11590	0.528982	1	1	CIRBP	1
GO:0050432	catecholamine secretion	1/180	48/11590	0.528982	1	1	PINK1	1
GO:0050709	negative regulation of protein secretion	1/180	48/11590	0.528982	1	1	SERGEF	1
GO:0060042	retina morphogenesis in camera-type eye	1/180	48/11590	0.528982	1	1	PTPRM	1
GO:0086065	cell communication involved in cardiac conduction	1/180	48/11590	0.528982	1	1	SCN1B	1
GO:0140115	export across plasma membrane	1/180	48/11590	0.528982	1	1	SLC4A4	1
GO:0001655	urogenital system development	5/180	311/11590	0.532395	1	1	KLF15/MAGI2/RGN/ZBTB16/EDNRB	5
GO:0043068	positive regulation of programmed cell death	7/180	443/11590	0.535891	1	1	MOAP1/ARL6IP5/ZBTB16/SMPD1/RPS6KA2/CLU/APBB1	7
GO:0006997	nucleus organization	2/180	115/11590	0.535993	1	1	SYNE1/HABP4	2
GO:0007009	plasma membrane organization	2/180	115/11590	0.535993	1	1	SMPD1/CLU	2
GO:0034754	cellular hormone metabolic process	2/180	115/11590	0.535993	1	1	DHRS7/EDNRB	2
GO:0016197	endosomal transport	3/180	181/11590	0.536184	1	1	UBXN6/STX12/CLN5	3
GO:0002455	humoral immune response mediated by circulating immunoglobulin	1/180	49/11590	0.536328	1	1	CLU	1
GO:0002823	negative regulation of adaptive immune response based on somatic recombination of immune receptors built from immunoglobulin superfamily domains	1/180	49/11590	0.536328	1	1	NDFIP1	1
GO:0006611	protein export from nucleus	1/180	49/11590	0.536328	1	1	CAMK1	1
GO:0010761	fibroblast migration	1/180	49/11590	0.536328	1	1	TNS1	1
GO:0016447	somatic recombination of immunoglobulin gene segments	1/180	49/11590	0.536328	1	1	NDFIP1	1
GO:0022029	telencephalon cell migration	1/180	49/11590	0.536328	1	1	DIXDC1	1
GO:0032786	positive regulation of DNA-templated transcription, elongation	1/180	49/11590	0.536328	1	1	CBX7	1
GO:0043112	receptor metabolic process	1/180	49/11590	0.536328	1	1	GPRASP1	1
GO:0043407	negative regulation of MAP kinase activity	1/180	49/11590	0.536328	1	1	SMPD1	1
GO:0045761	regulation of adenylate cyclase activity	1/180	49/11590	0.536328	1	1	EDNRB	1
GO:0045778	positive regulation of ossification	1/180	49/11590	0.536328	1	1	ZBTB16	1
GO:0046530	photoreceptor cell differentiation	1/180	49/11590	0.536328	1	1	BBS1	1
GO:0051145	smooth muscle cell differentiation	1/180	49/11590	0.536328	1	1	EDNRB	1
GO:0070265	necrotic cell death	1/180	49/11590	0.536328	1	1	SLC25A4	1
GO:0070613	regulation of protein processing	1/180	49/11590	0.536328	1	1	RPS6KA2	1
GO:1905517	macrophage migration	1/180	49/11590	0.536328	1	1	EDNRB	1
GO:0010948	negative regulation of cell cycle process	4/180	248/11590	0.540208	1	1	FAM107A/RPS6KA2/FHL1/APBB1	4
GO:0030048	actin filament-based movement	2/180	116/11590	0.540676	1	1	LIMCH1/SCN1B	2
GO:0046683	response to organophosphorus	2/180	116/11590	0.540676	1	1	PER1/PDE2A	2
GO:1902600	proton transmembrane transport	2/180	116/11590	0.540676	1	1	COX7A1/SLC25A4	2
GO:0022617	extracellular matrix disassembly	1/180	50/11590	0.543559	1	1	PBXIP1	1
GO:0033866	nucleoside bisphosphate biosynthetic process	1/180	50/11590	0.543559	1	1	PDK4	1
GO:0034030	ribonucleoside bisphosphate biosynthetic process	1/180	50/11590	0.543559	1	1	PDK4	1
GO:0034033	purine nucleoside bisphosphate biosynthetic process	1/180	50/11590	0.543559	1	1	PDK4	1
GO:0035914	skeletal muscle cell differentiation	1/180	50/11590	0.543559	1	1	HLF	1
GO:0038093	Fc receptor signaling pathway	1/180	50/11590	0.543559	1	1	MAPK10	1
GO:0043903	regulation of biological process involved in symbiotic interaction	1/180	50/11590	0.543559	1	1	SMPD1	1
GO:0051205	protein insertion into membrane	1/180	50/11590	0.543559	1	1	MOAP1	1
GO:0071806	protein transmembrane transport	1/180	50/11590	0.543559	1	1	EDNRB	1
GO:0090311	regulation of protein deacetylation	1/180	50/11590	0.543559	1	1	PINK1	1
GO:0007204	positive regulation of cytosolic calcium ion concentration	3/180	183/11590	0.543637	1	1	RIC3/EDNRB/S1PR1	3
GO:0072657	protein localization to membrane	7/180	447/11590	0.545514	1	1	MOAP1/ARL6IP5/MAGI2/VAMP2/DLG2/CPE/BBS1	7
GO:0051668	localization within membrane	8/180	514/11590	0.548807	1	1	MOAP1/STX12/ARL6IP5/MAGI2/VAMP2/DLG2/CPE/BBS1	8
GO:0015980	energy derivation by oxidation of organic compounds	4/180	251/11590	0.54975	1	1	PINK1/GABARAPL1/ISCU/COX7A1	4
GO:0006687	glycosphingolipid metabolic process	1/180	51/11590	0.550679	1	1	SMPD1	1
GO:0010518	positive regulation of phospholipase activity	1/180	51/11590	0.550679	1	1	ARHGAP6	1
GO:0010972	negative regulation of G2/M transition of mitotic cell cycle	1/180	51/11590	0.550679	1	1	FHL1	1
GO:0017156	calcium-ion regulated exocytosis	1/180	51/11590	0.550679	1	1	VAMP2	1
GO:0051353	positive regulation of oxidoreductase activity	1/180	51/11590	0.550679	1	1	RGN	1
GO:0051496	positive regulation of stress fiber assembly	1/180	51/11590	0.550679	1	1	LIMCH1	1
GO:0060986	endocrine hormone secretion	1/180	51/11590	0.550679	1	1	CRY2	1
GO:0071320	cellular response to cAMP	1/180	51/11590	0.550679	1	1	PDE2A	1
GO:1902305	regulation of sodium ion transmembrane transport	1/180	51/11590	0.550679	1	1	SCN1B	1
GO:1903051	negative regulation of proteolysis involved in protein catabolic process	1/180	51/11590	0.550679	1	1	GABARAPL2	1
GO:0009260	ribonucleotide biosynthetic process	3/180	186/11590	0.554687	1	1	PINK1/NME5/PDK4	3
GO:0021885	forebrain cell migration	1/180	52/11590	0.557688	1	1	DIXDC1	1
GO:0044091	membrane biogenesis	1/180	52/11590	0.557688	1	1	SERINC1	1
GO:0046888	negative regulation of hormone secretion	1/180	52/11590	0.557688	1	1	CRY2	1
GO:0050918	positive chemotaxis	1/180	52/11590	0.557688	1	1	S1PR1	1
GO:0051784	negative regulation of nuclear division	1/180	52/11590	0.557688	1	1	RPS6KA2	1
GO:0055078	sodium ion homeostasis	1/180	52/11590	0.557688	1	1	EDNRB	1
GO:0051592	response to calcium ion	2/180	120/11590	0.55908	1	1	SMPD1/ADD1	2
GO:0008064	regulation of actin polymerization or depolymerization	2/180	121/11590	0.563599	1	1	KANK3/ADD1	2
GO:0008277	regulation of G protein-coupled receptor signaling pathway	2/180	121/11590	0.563599	1	1	GPRASP1/GNG7	2
GO:1903531	negative regulation of secretion by cell	2/180	121/11590	0.563599	1	1	SERGEF/CRY2	2
GO:0001895	retina homeostasis	1/180	53/11590	0.564588	1	1	BBS1	1
GO:0002712	regulation of B cell mediated immunity	1/180	53/11590	0.564588	1	1	NDFIP1	1
GO:0002889	regulation of immunoglobulin mediated immune response	1/180	53/11590	0.564588	1	1	NDFIP1	1
GO:0010569	regulation of double-strand break repair via homologous recombination	1/180	53/11590	0.564588	1	1	TERF2IP	1
GO:0035904	aorta development	1/180	53/11590	0.564588	1	1	PDE2A	1
GO:0048488	synaptic vesicle endocytosis	1/180	53/11590	0.564588	1	1	VAMP2	1
GO:0055008	cardiac muscle tissue morphogenesis	1/180	53/11590	0.564588	1	1	S1PR1	1
GO:0140238	presynaptic endocytosis	1/180	53/11590	0.564588	1	1	VAMP2	1
GO:1902750	negative regulation of cell cycle G2/M phase transition	1/180	53/11590	0.564588	1	1	FHL1	1
GO:0007269	neurotransmitter secretion	2/180	122/11590	0.568085	1	1	VAMP2/PTPRN2	2
GO:0061351	neural precursor cell proliferation	2/180	122/11590	0.568085	1	1	DIXDC1/BBS1	2
GO:0099643	signal release from synapse	2/180	122/11590	0.568085	1	1	VAMP2/PTPRN2	2
GO:1903829	positive regulation of protein localization	6/180	391/11590	0.570129	1	1	RIC3/PINK1/VPS11/CAMK1/VAMP2/APBB1	6
GO:0001755	neural crest cell migration	1/180	54/11590	0.571382	1	1	EDNRB	1
GO:0002820	negative regulation of adaptive immune response	1/180	54/11590	0.571382	1	1	NDFIP1	1
GO:0006081	cellular aldehyde metabolic process	1/180	54/11590	0.571382	1	1	EDNRB	1
GO:0051149	positive regulation of muscle cell differentiation	1/180	54/11590	0.571382	1	1	CAMK1	1
GO:0070972	protein localization to endoplasmic reticulum	1/180	54/11590	0.571382	1	1	GABARAPL2	1
GO:1903317	regulation of protein maturation	1/180	54/11590	0.571382	1	1	RPS6KA2	1
GO:0043254	regulation of protein-containing complex assembly	5/180	325/11590	0.571793	1	1	KANK3/PINK1/VPS11/CLU/ADD1	5
GO:0030832	regulation of actin filament length	2/180	123/11590	0.572538	1	1	KANK3/ADD1	2
GO:0051384	response to glucocorticoid	2/180	123/11590	0.572538	1	1	FAM107A/KLF9	2
GO:0071322	cellular response to carbohydrate stimulus	2/180	123/11590	0.572538	1	1	RPS6KA2/PTPRN2	2
GO:0071456	cellular response to hypoxia	2/180	123/11590	0.572538	1	1	PINK1/KCNK3	2
GO:0023061	signal release	6/180	392/11590	0.572647	1	1	PINK1/VAMP2/PTPRN2/EDNRB/CRY2/CPE	6
GO:0030003	cellular cation homeostasis	6/180	392/11590	0.572647	1	1	NDFIP1/SLC22A17/ISCU/RGN/SLC4A4/CLN5	6
GO:0009895	negative regulation of catabolic process	4/180	259/11590	0.574686	1	1	PINK1/GABARAPL2/RGN/CIRBP	4
GO:2000146	negative regulation of cell motility	4/180	259/11590	0.574686	1	1	LIMCH1/MAGI2/RGN/PTPRM	4
GO:0010608	post-transcriptional regulation of gene expression	6/180	393/11590	0.575158	1	1	PINK1/HABP4/CPEB3/SECISBP2L/PER1/CIRBP	6
GO:0009205	purine ribonucleoside triphosphate metabolic process	3/180	192/11590	0.576306	1	1	PINK1/SLC4A4/NME5	3
GO:0031330	negative regulation of cellular catabolic process	3/180	192/11590	0.576306	1	1	PINK1/RGN/CIRBP	3
GO:0009411	response to UV	2/180	124/11590	0.576957	1	1	SMPD1/CIRBP	2
GO:0043488	regulation of mRNA stability	2/180	124/11590	0.576957	1	1	CPEB3/CIRBP	2
GO:0055082	cellular chemical homeostasis	8/180	527/11590	0.577511	1	1	NDFIP1/SLC22A17/KLF15/ISCU/RGN/SLC4A4/PTPRN2/CLN5	8
GO:0001736	establishment of planar polarity	1/180	55/11590	0.57807	1	1	MAGI2	1
GO:0007164	establishment of tissue polarity	1/180	55/11590	0.57807	1	1	MAGI2	1
GO:0016445	somatic diversification of immunoglobulins	1/180	55/11590	0.57807	1	1	NDFIP1	1
GO:0032206	positive regulation of telomere maintenance	1/180	55/11590	0.57807	1	1	TERF2IP	1
GO:0032413	negative regulation of ion transmembrane transporter activity	1/180	55/11590	0.57807	1	1	KCNAB1	1
GO:0034121	regulation of toll-like receptor signaling pathway	1/180	55/11590	0.57807	1	1	PJA2	1
GO:0045670	regulation of osteoclast differentiation	1/180	55/11590	0.57807	1	1	TCTA	1
GO:0061077	chaperone-mediated protein folding	1/180	55/11590	0.57807	1	1	CLU	1
GO:1902373	negative regulation of mRNA catabolic process	1/180	55/11590	0.57807	1	1	CIRBP	1
GO:0051345	positive regulation of hydrolase activity	7/180	461/11590	0.578525	1	1	APH1B/PINK1/ARL6IP5/MAGI2/RGN/S1PR1/ARHGAP6	7
GO:0006164	purine nucleotide biosynthetic process	3/180	193/11590	0.579845	1	1	PINK1/NME5/PDK4	3
GO:0009743	response to carbohydrate	3/180	193/11590	0.579845	1	1	VAMP2/RPS6KA2/PTPRN2	3
GO:0046390	ribose phosphate biosynthetic process	3/180	193/11590	0.579845	1	1	PINK1/NME5/PDK4	3
GO:0001678	cellular glucose homeostasis	2/180	125/11590	0.581343	1	1	KLF15/PTPRN2	2
GO:0010810	regulation of cell-substrate adhesion	3/180	194/11590	0.583366	1	1	LIMCH1/FAM107A/ARHGAP6	3
GO:0016358	dendrite development	3/180	194/11590	0.583366	1	1	CPEB3/CAMK1/BBS1	3
GO:0003170	heart valve development	1/180	56/11590	0.584654	1	1	PDE2A	1
GO:0009880	embryonic pattern specification	1/180	56/11590	0.584654	1	1	ZBTB16	1
GO:0015800	acidic amino acid transport	1/180	56/11590	0.584654	1	1	ARL6IP5	1
GO:0035567	non-canonical Wnt signaling pathway	1/180	56/11590	0.584654	1	1	MAGI2	1
GO:0046847	filopodium assembly	1/180	56/11590	0.584654	1	1	GPM6A	1
GO:0090497	mesenchymal cell migration	1/180	56/11590	0.584654	1	1	EDNRB	1
GO:1901361	organic cyclic compound catabolic process	6/180	397/11590	0.58513	1	1	PDE7B/CPEB3/RGN/PDE8B/PDE2A/CIRBP	6
GO:0045444	fat cell differentiation	3/180	195/11590	0.586868	1	1	ZBTB16/CREBL2/BBS1	3
GO:0090150	establishment of protein localization to membrane	3/180	195/11590	0.586868	1	1	MOAP1/VAMP2/BBS1	3
GO:0031400	negative regulation of protein modification process	6/180	398/11590	0.587605	1	1	TERF2IP/KLF15/RGN/SMPD1/PHF1/CRY2	6
GO:0120254	olefinic compound metabolic process	2/180	127/11590	0.590016	1	1	DHRS7/EDNRB	2
GO:0009144	purine nucleoside triphosphate metabolic process	3/180	196/11590	0.590352	1	1	PINK1/SLC4A4/NME5	3
GO:0061061	muscle structure development	8/180	533/11590	0.590481	1	1	SYNE1/CAMK1/SORBS2/POU6F1/HLF/FHL1/EDNRB/S1PR1	8
GO:0007004	telomere maintenance via telomerase	1/180	57/11590	0.591136	1	1	TERF2IP	1
GO:0007608	sensory perception of smell	1/180	57/11590	0.591136	1	1	BBS1	1
GO:0014823	response to activity	1/180	57/11590	0.591136	1	1	CRY2	1
GO:0034394	protein localization to cell surface	1/180	57/11590	0.591136	1	1	RIC3	1
GO:0035418	protein localization to synapse	1/180	57/11590	0.591136	1	1	DLG2	1
GO:0070542	response to fatty acid	1/180	57/11590	0.591136	1	1	PDK4	1
GO:0072678	T cell migration	1/180	57/11590	0.591136	1	1	S1PR1	1
GO:0120192	tight junction assembly	1/180	57/11590	0.591136	1	1	MPDZ	1
GO:0150076	neuroinflammatory response	1/180	57/11590	0.591136	1	1	CLU	1
GO:0080135	regulation of cellular response to stress	9/180	600/11590	0.591238	1	1	DIXDC1/PINK1/TERF2IP/ARL6IP5/PJA2/NME5/PER1/DNAJB9/CLU	9
GO:0009199	ribonucleoside triphosphate metabolic process	3/180	197/11590	0.593817	1	1	PINK1/SLC4A4/NME5	3
GO:0010970	transport along microtubule	2/180	128/11590	0.594302	1	1	ARMCX3/DLG2	2
GO:0014074	response to purine-containing compound	2/180	128/11590	0.594302	1	1	PER1/PDE2A	2
GO:0016064	immunoglobulin mediated immune response	2/180	128/11590	0.594302	1	1	NDFIP1/CLU	2
GO:0043487	regulation of RNA stability	2/180	128/11590	0.594302	1	1	CPEB3/CIRBP	2
GO:0045834	positive regulation of lipid metabolic process	2/180	128/11590	0.594302	1	1	RGN/CREBL2	2
GO:0060041	retina development in camera-type eye	2/180	128/11590	0.594302	1	1	PTPRM/GPM6A	2
GO:0002274	myeloid leukocyte activation	3/180	198/11590	0.597263	1	1	PJA2/VAMP2/CLU	3
GO:0006091	generation of precursor metabolites and energy	6/180	402/11590	0.597428	1	1	PINK1/GABARAPL1/ISCU/SLC4A4/COX7A1/SLC25A4	6
GO:0002381	immunoglobulin production involved in immunoglobulin-mediated immune response	1/180	58/11590	0.597517	1	1	NDFIP1	1
GO:0005977	glycogen metabolic process	1/180	58/11590	0.597517	1	1	GABARAPL1	1
GO:0006278	RNA-templated DNA biosynthetic process	1/180	58/11590	0.597517	1	1	TERF2IP	1
GO:0015807	L-amino acid transport	1/180	58/11590	0.597517	1	1	ARL6IP5	1
GO:0035019	somatic stem cell population maintenance	1/180	58/11590	0.597517	1	1	LDB2	1
GO:0038034	signal transduction in absence of ligand	1/180	58/11590	0.597517	1	1	MOAP1	1
GO:0043627	response to estrogen	1/180	58/11590	0.597517	1	1	WBP2	1
GO:0045665	negative regulation of neuron differentiation	1/180	58/11590	0.597517	1	1	DIXDC1	1
GO:0048524	positive regulation of viral process	1/180	58/11590	0.597517	1	1	SMPD1	1
GO:0097192	extrinsic apoptotic signaling pathway in absence of ligand	1/180	58/11590	0.597517	1	1	MOAP1	1
GO:0036294	cellular response to decreased oxygen levels	2/180	129/11590	0.598555	1	1	PINK1/KCNK3	2
GO:0072522	purine-containing compound biosynthetic process	3/180	199/11590	0.60069	1	1	PINK1/NME5/PDK4	3
GO:0007612	learning	2/180	130/11590	0.602775	1	1	ATP8A1/PDE8B	2
GO:0019724	B cell mediated immunity	2/180	130/11590	0.602775	1	1	NDFIP1/CLU	2
GO:0002562	somatic diversification of immune receptors via germline recombination within a single locus	1/180	59/11590	0.603799	1	1	NDFIP1	1
GO:0002704	negative regulation of leukocyte mediated immunity	1/180	59/11590	0.603799	1	1	NDFIP1	1
GO:0006073	cellular glucan metabolic process	1/180	59/11590	0.603799	1	1	GABARAPL1	1
GO:0006956	complement activation	1/180	59/11590	0.603799	1	1	CLU	1
GO:0016444	somatic cell DNA recombination	1/180	59/11590	0.603799	1	1	NDFIP1	1
GO:0030317	flagellated sperm motility	1/180	59/11590	0.603799	1	1	RGN	1
GO:0032233	positive regulation of actin filament bundle assembly	1/180	59/11590	0.603799	1	1	LIMCH1	1
GO:0042130	negative regulation of T cell proliferation	1/180	59/11590	0.603799	1	1	NDFIP1	1
GO:0044042	glucan metabolic process	1/180	59/11590	0.603799	1	1	GABARAPL1	1
GO:0046824	positive regulation of nucleocytoplasmic transport	1/180	59/11590	0.603799	1	1	CAMK1	1
GO:0060193	positive regulation of lipase activity	1/180	59/11590	0.603799	1	1	ARHGAP6	1
GO:0061035	regulation of cartilage development	1/180	59/11590	0.603799	1	1	ZBTB16	1
GO:0097722	sperm motility	1/180	59/11590	0.603799	1	1	RGN	1
GO:1902475	L-alpha-amino acid transmembrane transport	1/180	59/11590	0.603799	1	1	ARL6IP5	1
GO:0044265	cellular macromolecule catabolic process	11/180	740/11590	0.604349	1	1	RNF146/NDFIP1/PINK1/SERGEF/FBXL5/CPEB3/GABARAP/RGN/DNAJB9/CLU/CIRBP	11
GO:0019725	cellular homeostasis	9/180	607/11590	0.605325	1	1	NDFIP1/PINK1/SLC22A17/KLF15/ISCU/RGN/SLC4A4/PTPRN2/CLN5	9
GO:0017148	negative regulation of translation	2/180	131/11590	0.606961	1	1	CPEB3/CIRBP	2
GO:0051092	positive regulation of NF-kappaB transcription factor activity	2/180	131/11590	0.606961	1	1	TERF2IP/CLU	2
GO:2000058	regulation of ubiquitin-dependent protein catabolic process	2/180	131/11590	0.606961	1	1	GABARAP/CLU	2
GO:0006873	cellular ion homeostasis	6/180	406/11590	0.607127	1	1	NDFIP1/SLC22A17/ISCU/RGN/SLC4A4/CLN5	6
GO:0034329	cell junction assembly	5/180	339/11590	0.609431	1	1	LIMCH1/FAM107A/MPDZ/GPM6A/ARHGAP6	5
GO:0044089	positive regulation of cellular component biogenesis	6/180	407/11590	0.609533	1	1	PINK1/MOAP1/LIMCH1/LDB2/GPM6A/CLU	6
GO:0001523	retinoid metabolic process	1/180	60/11590	0.609984	1	1	DHRS7	1
GO:0008589	regulation of smoothened signaling pathway	1/180	60/11590	0.609984	1	1	TXNDC15	1
GO:0010517	regulation of phospholipase activity	1/180	60/11590	0.609984	1	1	ARHGAP6	1
GO:0051865	protein autoubiquitination	1/180	60/11590	0.609984	1	1	RNF146	1
GO:0071230	cellular response to amino acid stimulus	1/180	60/11590	0.609984	1	1	CPEB3	1
GO:1901880	negative regulation of protein depolymerization	1/180	60/11590	0.609984	1	1	ADD1	1
GO:1902369	negative regulation of RNA catabolic process	1/180	60/11590	0.609984	1	1	CIRBP	1
GO:0062012	regulation of small molecule metabolic process	4/180	271/11590	0.610602	1	1	PINK1/RGN/SLC4A4/PDK4	4
GO:0006354	DNA-templated transcription elongation	3/180	202/11590	0.610858	1	1	CALCOCO1/CBX7/LDB2	3
GO:0051100	negative regulation of binding	2/180	132/11590	0.611114	1	1	HABP4/CAMK1	2
GO:0060249	anatomical structure homeostasis	4/180	272/11590	0.61351	1	1	LDB2/PDK4/S1PR1/BBS1	4
GO:0034976	response to endoplasmic reticulum stress	3/180	203/11590	0.614208	1	1	UBXN6/DNAJB9/CLU	3
GO:0046718	viral entry into host cell	2/180	133/11590	0.615234	1	1	SMPD1/SCARB2	2
GO:0003281	ventricular septum development	1/180	61/11590	0.616073	1	1	PDE2A	1
GO:0010633	negative regulation of epithelial cell migration	1/180	61/11590	0.616073	1	1	PTPRM	1
GO:0030032	lamellipodium assembly	1/180	61/11590	0.616073	1	1	S1PR1	1
GO:0030968	endoplasmic reticulum unfolded protein response	1/180	61/11590	0.616073	1	1	DNAJB9	1
GO:0050810	regulation of steroid biosynthetic process	1/180	61/11590	0.616073	1	1	PDE8B	1
GO:0051937	catecholamine transport	1/180	61/11590	0.616073	1	1	PINK1	1
GO:0140029	exocytic process	1/180	61/11590	0.616073	1	1	VPS11	1
GO:1990542	mitochondrial transmembrane transport	1/180	61/11590	0.616073	1	1	SLC25A4	1
GO:0048863	stem cell differentiation	3/180	204/11590	0.61754	1	1	NAP1L2/GPM6A/EDNRB	3
GO:0043547	positive regulation of GTPase activity	3/180	205/11590	0.620852	1	1	RGN/S1PR1/ARHGAP6	3
GO:0030433	ubiquitin-dependent ERAD pathway	1/180	62/11590	0.622067	1	1	DNAJB9	1
GO:0036465	synaptic vesicle recycling	1/180	62/11590	0.622067	1	1	VAMP2	1
GO:0046637	regulation of alpha-beta T cell differentiation	1/180	62/11590	0.622067	1	1	ZBTB16	1
GO:2000514	regulation of CD4-positive, alpha-beta T cell activation	1/180	62/11590	0.622067	1	1	NDFIP1	1
GO:0022412	cellular process involved in reproduction in multicellular organism	4/180	275/11590	0.622157	1	1	PACRG/NME5/ZBTB16/RPS6KA2	4
GO:2000045	regulation of G1/S transition of mitotic cell cycle	2/180	135/11590	0.623373	1	1	FAM107A/FHL1	2
GO:0007507	heart development	7/180	481/11590	0.623631	1	1	CRELD1/SORBS2/RPS6KA2/POU6F1/PDE2A/S1PR1/CPE	7
GO:0051248	negative regulation of protein metabolic process	12/180	818/11590	0.624191	1	1	TERF2IP/KLF15/CPEB3/GABARAPL2/ITM2B/RGN/SMPD1/PHF1/EDNRB/CRY2/CLU/CIRBP	12
GO:0007517	muscle organ development	4/180	276/11590	0.625012	1	1	POU6F1/HLF/FHL1/S1PR1	4
GO:0015711	organic anion transport	4/180	276/11590	0.625012	1	1	SLC25A42/ARL6IP5/SLC4A4/SLC25A4	4
GO:0019216	regulation of lipid metabolic process	4/180	276/11590	0.625012	1	1	RGN/PDE8B/PDK4/CREBL2	4
GO:0007029	endoplasmic reticulum organization	1/180	63/11590	0.627968	1	1	REEP5	1
GO:0016101	diterpenoid metabolic process	1/180	63/11590	0.627968	1	1	DHRS7	1
GO:0031060	regulation of histone methylation	1/180	63/11590	0.627968	1	1	PHF1	1
GO:0031100	animal organ regeneration	1/180	63/11590	0.627968	1	1	RGN	1
GO:0046635	positive regulation of alpha-beta T cell activation	1/180	63/11590	0.627968	1	1	ZBTB16	1
GO:0086001	cardiac muscle cell action potential	1/180	63/11590	0.627968	1	1	SCN1B	1
GO:0120193	tight junction organization	1/180	63/11590	0.627968	1	1	MPDZ	1
GO:0010833	telomere maintenance via telomere lengthening	1/180	64/11590	0.633777	1	1	TERF2IP	1
GO:0031279	regulation of cyclase activity	1/180	64/11590	0.633777	1	1	EDNRB	1
GO:0042147	retrograde transport, endosome to Golgi	1/180	64/11590	0.633777	1	1	CLN5	1
GO:0060415	muscle tissue morphogenesis	1/180	64/11590	0.633777	1	1	S1PR1	1
GO:0009141	nucleoside triphosphate metabolic process	3/180	209/11590	0.633907	1	1	PINK1/SLC4A4/NME5	3
GO:0035725	sodium ion transmembrane transport	2/180	138/11590	0.635334	1	1	SLC4A4/SCN1B	2
GO:0061013	regulation of mRNA catabolic process	2/180	138/11590	0.635334	1	1	CPEB3/CIRBP	2
GO:1901988	negative regulation of cell cycle phase transition	3/180	210/11590	0.637122	1	1	FAM107A/FHL1/APBB1	3
GO:0050877	nervous system process	13/180	893/11590	0.637542	1	1	CPEB3/FAM107A/ARL6IP5/ATP8A1/PJA2/PDE8B/SCN1B/RPS6KA2/EDNRB/S1PR1/CLN5/SCARB2/BBS1	13
GO:0048878	chemical homeostasis	12/180	826/11590	0.63775	1	1	NDFIP1/SLC22A17/KLF15/FBXL5/ISCU/RGN/SLC4A4/PTPRN2/PDK4/EDNRB/CRY2/CLN5	12
GO:0035265	organ growth	2/180	139/11590	0.639254	1	1	SORBS2/S1PR1	2
GO:0044409	entry into host	2/180	139/11590	0.639254	1	1	SMPD1/SCARB2	2
GO:0051048	negative regulation of secretion	2/180	139/11590	0.639254	1	1	SERGEF/CRY2	2
GO:0003208	cardiac ventricle morphogenesis	1/180	65/11590	0.639497	1	1	CPE	1
GO:0006635	fatty acid beta-oxidation	1/180	65/11590	0.639497	1	1	IVD	1
GO:0010657	muscle cell apoptotic process	1/180	65/11590	0.639497	1	1	RPS6KA2	1
GO:0042446	hormone biosynthetic process	1/180	65/11590	0.639497	1	1	PDE8B	1
GO:0055013	cardiac muscle cell development	1/180	65/11590	0.639497	1	1	SORBS2	1
GO:2000243	positive regulation of reproductive process	1/180	65/11590	0.639497	1	1	EDNRB	1
GO:2000736	regulation of stem cell differentiation	1/180	65/11590	0.639497	1	1	NAP1L2	1
GO:2001021	negative regulation of response to DNA damage stimulus	1/180	65/11590	0.639497	1	1	CLU	1
GO:0055065	metal ion homeostasis	6/180	420/11590	0.640058	1	1	NDFIP1/SLC22A17/FBXL5/ISCU/RGN/EDNRB	6
GO:0044843	cell cycle G1/S phase transition	3/180	211/11590	0.640317	1	1	FAM107A/FHL1/APBB1	3
GO:0006575	cellular modified amino acid metabolic process	2/180	140/11590	0.643142	1	1	SERINC1/ARL6IP5	2
GO:0046631	alpha-beta T cell activation	2/180	140/11590	0.643142	1	1	NDFIP1/ZBTB16	2
GO:0060047	heart contraction	3/180	212/11590	0.643493	1	1	SCN1B/RPS6KA2/EDNRB	3
GO:0009306	protein secretion	4/180	283/11590	0.644616	1	1	SERGEF/PTPRN2/EDNRB/APBB1	4
GO:0002200	somatic diversification of immune receptors	1/180	66/11590	0.645127	1	1	NDFIP1	1
GO:0019915	lipid storage	1/180	66/11590	0.645127	1	1	CRY2	1
GO:0061157	mRNA destabilization	1/180	66/11590	0.645127	1	1	CPEB3	1
GO:0043604	amide biosynthetic process	9/180	628/11590	0.646119	1	1	PINK1/HABP4/CPEB3/ABCA8/SECISBP2L/SMPD1/PER1/PDK4/CIRBP	9
GO:0008610	lipid biosynthetic process	8/180	560/11590	0.646372	1	1	SERINC1/ACSM5/ABCA8/RGN/PDE8B/SMPD1/PDK4/CREBL2	8
GO:0035592	establishment of protein localization to extracellular region	4/180	284/11590	0.647362	1	1	SERGEF/PTPRN2/EDNRB/APBB1	4
GO:0006446	regulation of translational initiation	1/180	67/11590	0.65067	1	1	HABP4	1
GO:0032890	regulation of organic acid transport	1/180	67/11590	0.65067	1	1	ARL6IP5	1
GO:0086003	cardiac muscle cell contraction	1/180	67/11590	0.65067	1	1	SCN1B	1
GO:0001764	neuron migration	2/180	142/11590	0.650818	1	1	GPM6A/BBS1	2
GO:0007219	Notch signaling pathway	2/180	142/11590	0.650818	1	1	APH1B/SORBS2	2
GO:0035637	multicellular organismal signaling	2/180	142/11590	0.650818	1	1	SCN1B/S1PR1	2
GO:0071453	cellular response to oxygen levels	2/180	143/11590	0.654608	1	1	PINK1/KCNK3	2
GO:0071214	cellular response to abiotic stimulus	4/180	287/11590	0.655515	1	1	HABP4/SMPD1/PDE2A/CRY2	4
GO:0104004	cellular response to environmental stimulus	4/180	287/11590	0.655515	1	1	HABP4/SMPD1/PDE2A/CRY2	4
GO:0030500	regulation of bone mineralization	1/180	68/11590	0.656127	1	1	S1PR1	1
GO:0032456	endocytic recycling	1/180	68/11590	0.656127	1	1	STX12	1
GO:0050779	RNA destabilization	1/180	68/11590	0.656127	1	1	CPEB3	1
GO:0050848	regulation of calcium-mediated signaling	1/180	68/11590	0.656127	1	1	RGN	1
GO:0071229	cellular response to acid chemical	1/180	68/11590	0.656127	1	1	CPEB3	1
GO:0040013	negative regulation of locomotion	4/180	288/11590	0.658205	1	1	LIMCH1/MAGI2/RGN/PTPRM	4
GO:0140352	export from cell	10/180	703/11590	0.658815	1	1	PINK1/VPS11/SERGEF/SLC4A4/VAMP2/PTPRN2/EDNRB/CRY2/CPE/APBB1	10
GO:0010942	positive regulation of cell death	7/180	498/11590	0.659826	1	1	MOAP1/ARL6IP5/ZBTB16/SMPD1/RPS6KA2/CLU/APBB1	7
GO:0071692	protein localization to extracellular region	4/180	289/11590	0.660881	1	1	SERGEF/PTPRN2/EDNRB/APBB1	4
GO:0034243	regulation of transcription elongation by RNA polymerase II	1/180	69/11590	0.661499	1	1	CBX7	1
GO:0043242	negative regulation of protein-containing complex disassembly	1/180	69/11590	0.661499	1	1	ADD1	1
GO:0043299	leukocyte degranulation	1/180	69/11590	0.661499	1	1	VAMP2	1
GO:0048644	muscle organ morphogenesis	1/180	69/11590	0.661499	1	1	S1PR1	1
GO:0050772	positive regulation of axonogenesis	1/180	69/11590	0.661499	1	1	DIXDC1	1
GO:0061014	positive regulation of mRNA catabolic process	1/180	69/11590	0.661499	1	1	CPEB3	1
GO:0072384	organelle transport along microtubule	1/180	69/11590	0.661499	1	1	ARMCX3	1
GO:0010950	positive regulation of endopeptidase activity	2/180	145/11590	0.662088	1	1	APH1B/ARL6IP5	2
GO:0021543	pallium development	2/180	145/11590	0.662088	1	1	DIXDC1/BBS1	2
GO:0043484	regulation of RNA splicing	2/180	145/11590	0.662088	1	1	HABP4/CIRBP	2
GO:0051896	regulation of protein kinase B signaling	2/180	145/11590	0.662088	1	1	PINK1/MAGI2	2
GO:0007283	spermatogenesis	5/180	360/11590	0.662187	1	1	PACRG/SYNE1/RGN/NME5/ZBTB16	5
GO:0030036	actin cytoskeleton organization	8/180	569/11590	0.664023	1	1	KANK3/DIXDC1/LIMCH1/FAM107A/SORBS2/S1PR1/ARHGAP6/ADD1	8
GO:0031960	response to corticosteroid	2/180	146/11590	0.66578	1	1	FAM107A/KLF9	2
GO:0001942	hair follicle development	1/180	70/11590	0.666788	1	1	LDB2	1
GO:0006112	energy reserve metabolic process	1/180	70/11590	0.666788	1	1	GABARAPL1	1
GO:0010507	negative regulation of autophagy	1/180	70/11590	0.666788	1	1	PINK1	1
GO:0048477	oogenesis	1/180	70/11590	0.666788	1	1	RPS6KA2	1
GO:0055006	cardiac cell development	1/180	70/11590	0.666788	1	1	SORBS2	1
GO:1902117	positive regulation of organelle assembly	1/180	70/11590	0.666788	1	1	MOAP1	1
GO:1903828	negative regulation of protein localization	2/180	147/11590	0.669439	1	1	NDFIP1/SERGEF	2
GO:0021766	hippocampus development	1/180	71/11590	0.671994	1	1	BBS1	1
GO:0034340	response to type I interferon	1/180	71/11590	0.671994	1	1	SMPD1	1
GO:0043434	response to peptide hormone	5/180	365/11590	0.674053	1	1	KLF15/VAMP2/PDK4/EDNRB/CRY2	5
GO:1902679	negative regulation of RNA biosynthetic process	14/180	985/11590	0.675734	1	1	PBXIP1/MAGEH1/EID1/CBX7/CPEB3/RGN/LDB2/ZBTB16/POU6F1/PER1/PDE2A/EDNRB/CRY2/APBB1	14
GO:0015844	monoamine transport	1/180	72/11590	0.67712	1	1	PINK1	1
GO:0022404	molting cycle process	1/180	72/11590	0.67712	1	1	LDB2	1
GO:0022405	hair cycle process	1/180	72/11590	0.67712	1	1	LDB2	1
GO:0098773	skin epidermis development	1/180	72/11590	0.67712	1	1	LDB2	1
GO:0003015	heart process	3/180	223/11590	0.677127	1	1	SCN1B/RPS6KA2/EDNRB	3
GO:0030029	actin filament-based process	9/180	645/11590	0.677389	1	1	KANK3/DIXDC1/LIMCH1/FAM107A/SORBS2/SCN1B/S1PR1/ARHGAP6/ADD1	9
GO:0048771	tissue remodeling	2/180	150/11590	0.680223	1	1	PDK4/S1PR1	2
GO:1901991	negative regulation of mitotic cell cycle phase transition	2/180	150/11590	0.680223	1	1	FAM107A/FHL1	2
GO:0007017	microtubule-based process	9/180	647/11590	0.680958	1	1	DIXDC1/ARMCX3/GABARAP/FAM107A/RGN/MPDZ/NME5/DLG2/BBS1	9
GO:0097190	apoptotic signaling pathway	7/180	509/11590	0.682111	1	1	PINK1/MOAP1/GABARAP/ARL6IP5/NME5/CLU/SLC25A4	7
GO:0002312	B cell activation involved in immune response	1/180	73/11590	0.682165	1	1	NDFIP1	1
GO:0006721	terpenoid metabolic process	1/180	73/11590	0.682165	1	1	DHRS7	1
GO:0008306	associative learning	1/180	73/11590	0.682165	1	1	PDE8B	1
GO:0034644	cellular response to UV	1/180	73/11590	0.682165	1	1	SMPD1	1
GO:1903312	negative regulation of mRNA metabolic process	1/180	73/11590	0.682165	1	1	CIRBP	1
GO:0060271	cilium assembly	3/180	225/11590	0.682986	1	1	TXNDC15/NME5/BBS1	3
GO:0015698	inorganic anion transport	2/180	151/11590	0.683754	1	1	SLC4A4/CRY2	2
GO:0033993	response to lipid	11/180	787/11590	0.685337	1	1	CALCOCO1/VPS11/UFSP2/WBP2/FAM107A/PER1/PDK4/NR3C2/EDNRB/CRY2/KLF9	11
GO:0051336	regulation of hydrolase activity	11/180	787/11590	0.685337	1	1	APH1B/PINK1/PBXIP1/ARL6IP5/MAGI2/CCPG1/RGN/S1PR1/CRY2/SCARB2/ARHGAP6	11
GO:0001738	morphogenesis of a polarized epithelium	1/180	74/11590	0.687133	1	1	MAGI2	1
GO:0007422	peripheral nervous system development	1/180	74/11590	0.687133	1	1	EDNRB	1
GO:0032091	negative regulation of protein binding	1/180	74/11590	0.687133	1	1	CAMK1	1
GO:0032273	positive regulation of protein polymerization	1/180	74/11590	0.687133	1	1	PINK1	1
GO:0050672	negative regulation of lymphocyte proliferation	1/180	74/11590	0.687133	1	1	NDFIP1	1
GO:0060395	SMAD protein signal transduction	1/180	74/11590	0.687133	1	1	MAGI2	1
GO:1901879	regulation of protein depolymerization	1/180	74/11590	0.687133	1	1	ADD1	1
GO:0007568	aging	2/180	152/11590	0.687253	1	1	RGN/EDNRB	2
GO:1902905	positive regulation of supramolecular fiber organization	2/180	152/11590	0.687253	1	1	LIMCH1/CLU	2
GO:0003012	muscle system process	5/180	371/11590	0.687929	1	1	KLF15/SORBS2/SCN1B/EDNRB/APBB1	5
GO:0010975	regulation of neuron projection development	5/180	371/11590	0.687929	1	1	DIXDC1/MAGI2/CAMK1/SCN1B/SCARB2	5
GO:0051091	positive regulation of DNA-binding transcription factor activity	3/180	227/11590	0.688766	1	1	PINK1/TERF2IP/CLU	3
GO:0072659	protein localization to plasma membrane	3/180	227/11590	0.688766	1	1	ARL6IP5/VAMP2/BBS1	3
GO:0014032	neural crest cell development	1/180	75/11590	0.692023	1	1	EDNRB	1
GO:0032945	negative regulation of mononuclear cell proliferation	1/180	75/11590	0.692023	1	1	NDFIP1	1
GO:0044264	cellular polysaccharide metabolic process	1/180	75/11590	0.692023	1	1	GABARAPL1	1
GO:0045666	positive regulation of neuron differentiation	1/180	75/11590	0.692023	1	1	NAP1L2	1
GO:0048232	male gamete generation	5/180	373/11590	0.692465	1	1	PACRG/SYNE1/RGN/NME5/ZBTB16	5
GO:0009749	response to glucose	2/180	154/11590	0.694157	1	1	VAMP2/PTPRN2	2
GO:0065004	protein-DNA complex assembly	2/180	154/11590	0.694157	1	1	TSPYL1/NAP1L2	2
GO:0048193	Golgi vesicle transport	3/180	229/11590	0.694468	1	1	GABARAPL2/VAMP2/BBS1	3
GO:0030162	regulation of proteolysis	8/180	586/11590	0.695921	1	1	APH1B/PINK1/GABARAPL2/GABARAP/ARL6IP5/RGN/RPS6KA2/CLU	8
GO:0006096	glycolytic process	1/180	76/11590	0.696837	1	1	SLC4A4	1
GO:0006757	ATP generation from ADP	1/180	76/11590	0.696837	1	1	SLC4A4	1
GO:0021954	central nervous system neuron development	1/180	76/11590	0.696837	1	1	SCN1B	1
GO:0031123	RNA 3'-end processing	1/180	76/11590	0.696837	1	1	CPEB3	1
GO:1901019	regulation of calcium ion transmembrane transporter activity	1/180	76/11590	0.696837	1	1	RGN	1
GO:0031334	positive regulation of protein-containing complex assembly	2/180	155/11590	0.697561	1	1	PINK1/CLU	2
GO:0034599	cellular response to oxidative stress	3/180	231/11590	0.700091	1	1	PINK1/ARL6IP5/NME5	3
GO:0032204	regulation of telomere maintenance	1/180	77/11590	0.701577	1	1	TERF2IP	1
GO:0042310	vasoconstriction	1/180	77/11590	0.701577	1	1	EDNRB	1
GO:0046364	monosaccharide biosynthetic process	1/180	77/11590	0.701577	1	1	RGN	1
GO:0032940	secretion by cell	9/180	659/11590	0.701877	1	1	PINK1/VPS11/SERGEF/VAMP2/PTPRN2/EDNRB/CRY2/CPE/APBB1	9
GO:0060070	canonical Wnt signaling pathway	3/180	232/11590	0.702873	1	1	DIXDC1/RNF146/EDNRB	3
GO:0007610	behavior	7/180	520/11590	0.703466	1	1	CPEB3/ARL6IP5/ATP8A1/PJA2/PDE8B/EDNRB/BBS1	7
GO:0071478	cellular response to radiation	2/180	157/11590	0.704277	1	1	SMPD1/CRY2	2
GO:0061448	connective tissue development	3/180	233/11590	0.705636	1	1	PBXIP1/ZBTB16/BBS1	3
GO:0003333	amino acid transmembrane transport	1/180	78/11590	0.706242	1	1	ARL6IP5	1
GO:0006754	ATP biosynthetic process	1/180	78/11590	0.706242	1	1	PINK1	1
GO:0006835	dicarboxylic acid transport	1/180	78/11590	0.706242	1	1	ARL6IP5	1
GO:0060191	regulation of lipase activity	1/180	78/11590	0.706242	1	1	ARHGAP6	1
GO:1901606	alpha-amino acid catabolic process	1/180	78/11590	0.706242	1	1	IVD	1
GO:0042692	muscle cell differentiation	4/180	307/11590	0.706627	1	1	SYNE1/CAMK1/SORBS2/EDNRB	4
GO:0006006	glucose metabolic process	2/180	158/11590	0.707588	1	1	RGN/PDK4	2
GO:0030705	cytoskeleton-dependent intracellular transport	2/180	158/11590	0.707588	1	1	ARMCX3/DLG2	2
GO:0050807	regulation of synapse organization	2/180	158/11590	0.707588	1	1	CAMK1/GPM6A	2
GO:2001233	regulation of apoptotic signaling pathway	4/180	308/11590	0.709033	1	1	PINK1/NME5/CLU/SLC25A4	4
GO:0010389	regulation of G2/M transition of mitotic cell cycle	1/180	79/11590	0.710836	1	1	FHL1	1
GO:0045833	negative regulation of lipid metabolic process	1/180	79/11590	0.710836	1	1	PDE8B	1
GO:0062207	regulation of pattern recognition receptor signaling pathway	1/180	79/11590	0.710836	1	1	PJA2	1
GO:0070301	cellular response to hydrogen peroxide	1/180	79/11590	0.710836	1	1	PINK1	1
GO:0097581	lamellipodium organization	1/180	79/11590	0.710836	1	1	S1PR1	1
GO:0009746	response to hexose	2/180	159/11590	0.710869	1	1	VAMP2/PTPRN2	2
GO:0044000	movement in host	2/180	159/11590	0.710869	1	1	SMPD1/SCARB2	2
GO:0010038	response to metal ion	4/180	309/11590	0.711425	1	1	SMPD1/KCNK3/DLG2/ADD1	4
GO:0050678	regulation of epithelial cell proliferation	4/180	309/11590	0.711425	1	1	RGN/PTPRM/EDNRB/KLF9	4
GO:0044782	cilium organization	3/180	236/11590	0.713807	1	1	TXNDC15/NME5/BBS1	3
GO:0051046	regulation of secretion	7/180	526/11590	0.714714	1	1	PINK1/SERGEF/VAMP2/PTPRN2/EDNRB/CRY2/APBB1	7
GO:0006672	ceramide metabolic process	1/180	80/11590	0.715357	1	1	SMPD1	1
GO:0048661	positive regulation of smooth muscle cell proliferation	1/180	80/11590	0.715357	1	1	S1PR1	1
GO:0048864	stem cell development	1/180	80/11590	0.715357	1	1	EDNRB	1
GO:1903510	mucopolysaccharide metabolic process	1/180	80/11590	0.715357	1	1	EDNRB	1
GO:0050803	regulation of synapse structure or activity	2/180	161/11590	0.717338	1	1	CAMK1/GPM6A	2
GO:0007218	neuropeptide signaling pathway	1/180	81/11590	0.719809	1	1	CPE	1
GO:0009062	fatty acid catabolic process	1/180	81/11590	0.719809	1	1	IVD	1
GO:0019218	regulation of steroid metabolic process	1/180	81/11590	0.719809	1	1	PDE8B	1
GO:0061337	cardiac conduction	1/180	81/11590	0.719809	1	1	SCN1B	1
GO:1904427	positive regulation of calcium ion transmembrane transport	1/180	81/11590	0.719809	1	1	RGN	1
GO:2001251	negative regulation of chromosome organization	1/180	81/11590	0.719809	1	1	TERF2IP	1
GO:0006820	anion transport	5/180	386/11590	0.720861	1	1	SLC25A42/ARL6IP5/SLC4A4/CRY2/SLC25A4	5
GO:0030308	negative regulation of cell growth	2/180	163/11590	0.723686	1	1	CGRRF1/FHL1	2
GO:0044242	cellular lipid catabolic process	2/180	163/11590	0.723686	1	1	SMPD1/IVD	2
GO:0046031	ADP metabolic process	1/180	82/11590	0.724191	1	1	SLC4A4	1
GO:1902414	protein localization to cell junction	1/180	82/11590	0.724191	1	1	DLG2	1
GO:0002700	regulation of production of molecular mediator of immune response	2/180	164/11590	0.726815	1	1	NDFIP1/DNAJB9	2
GO:0045786	negative regulation of cell cycle	4/180	316/11590	0.727772	1	1	FAM107A/RPS6KA2/FHL1/APBB1	4
GO:0006664	glycolipid metabolic process	1/180	83/11590	0.728505	1	1	SMPD1	1
GO:0014033	neural crest cell differentiation	1/180	83/11590	0.728505	1	1	EDNRB	1
GO:0030316	osteoclast differentiation	1/180	83/11590	0.728505	1	1	TCTA	1
GO:0070664	negative regulation of leukocyte proliferation	1/180	83/11590	0.728505	1	1	NDFIP1	1
GO:0090263	positive regulation of canonical Wnt signaling pathway	1/180	83/11590	0.728505	1	1	RNF146	1
GO:0006457	protein folding	2/180	165/11590	0.729914	1	1	RIC3/CLU	2
GO:0098739	import across plasma membrane	2/180	165/11590	0.729914	1	1	ISCU/ARL6IP5	2
GO:0031589	cell-substrate adhesion	4/180	318/11590	0.732315	1	1	TMEM8B/LIMCH1/FAM107A/ARHGAP6	4
GO:0032784	regulation of DNA-templated transcription elongation	1/180	84/11590	0.732752	1	1	CBX7	1
GO:0048709	oligodendrocyte differentiation	1/180	84/11590	0.732752	1	1	CLU	1
GO:0051341	regulation of oxidoreductase activity	1/180	84/11590	0.732752	1	1	RGN	1
GO:0097306	cellular response to alcohol	1/180	84/11590	0.732752	1	1	KLF9	1
GO:1903509	liposaccharide metabolic process	1/180	84/11590	0.732752	1	1	SMPD1	1
GO:0007601	visual perception	2/180	166/11590	0.732983	1	1	CLN5/BBS1	2
GO:0034284	response to monosaccharide	2/180	166/11590	0.732983	1	1	VAMP2/PTPRN2	2
GO:0120031	plasma membrane bounded cell projection assembly	5/180	393/11590	0.735365	1	1	TXNDC15/NME5/GPM6A/S1PR1/BBS1	5
GO:0006469	negative regulation of protein kinase activity	2/180	167/11590	0.736023	1	1	RGN/SMPD1	2
GO:0006325	chromatin organization	6/180	466/11590	0.736099	1	1	WBP2/CBX7/TSPYL1/PHF1/NAP1L2/APBB1	6
GO:0005976	polysaccharide metabolic process	1/180	85/11590	0.736933	1	1	GABARAPL1	1
GO:0070167	regulation of biomineral tissue development	1/180	85/11590	0.736933	1	1	S1PR1	1
GO:0110149	regulation of biomineralization	1/180	85/11590	0.736933	1	1	S1PR1	1
GO:1901216	positive regulation of neuron death	1/180	85/11590	0.736933	1	1	CLU	1
GO:0050953	sensory perception of light stimulus	2/180	168/11590	0.739033	1	1	CLN5/BBS1	2
GO:0048666	neuron development	12/180	892/11590	0.7393	1	1	DIXDC1/CPEB3/MAGI2/CAMK1/SCN1B/PTPRM/GPM6A/EDNRB/CLN5/SCARB2/BBS1/APBB1	12
GO:0002275	myeloid cell activation involved in immune response	1/180	86/11590	0.741048	1	1	VAMP2	1
GO:0016079	synaptic vesicle exocytosis	1/180	86/11590	0.741048	1	1	VAMP2	1
GO:0048024	regulation of mRNA splicing, via spliceosome	1/180	86/11590	0.741048	1	1	CIRBP	1
GO:0090398	cellular senescence	1/180	86/11590	0.741048	1	1	MAPK10	1
GO:2001252	positive regulation of chromosome organization	1/180	86/11590	0.741048	1	1	TERF2IP	1
GO:0030336	negative regulation of cell migration	3/180	247/11590	0.742282	1	1	LIMCH1/MAGI2/PTPRM	3
GO:0042327	positive regulation of phosphorylation	9/180	685/11590	0.744183	1	1	PINK1/AKTIP/TERF2IP/LIMCH1/SLC4A4/CAMK1/EDNRB/CREBL2/CLU	9
GO:0008217	regulation of blood pressure	2/180	170/11590	0.744967	1	1	RPS6KA2/EDNRB	2
GO:0045216	cell-cell junction organization	2/180	170/11590	0.744967	1	1	MPDZ/ADD1	2
GO:0021549	cerebellum development	1/180	87/11590	0.7451	1	1	DIXDC1	1
GO:1902749	regulation of cell cycle G2/M phase transition	1/180	87/11590	0.7451	1	1	FHL1	1
GO:0007162	negative regulation of cell adhesion	3/180	249/11590	0.747212	1	1	NDFIP1/FAM107A/ARHGAP6	3
GO:0046879	hormone secretion	3/180	249/11590	0.747212	1	1	PTPRN2/CRY2/CPE	3
GO:0043491	protein kinase B signaling	2/180	171/11590	0.74789	1	1	PINK1/MAGI2	2
GO:0043279	response to alkaloid	1/180	88/11590	0.749089	1	1	SMPD1	1
GO:1901655	cellular response to ketone	1/180	88/11590	0.749089	1	1	KLF9	1
GO:1902106	negative regulation of leukocyte differentiation	1/180	88/11590	0.749089	1	1	TCTA	1
GO:0046394	carboxylic acid biosynthetic process	3/180	250/11590	0.749649	1	1	ACSM5/RGN/PDK4	3
GO:0032869	cellular response to insulin stimulus	2/180	172/11590	0.750785	1	1	VAMP2/PDK4	2
GO:0030031	cell projection assembly	5/180	401/11590	0.751268	1	1	TXNDC15/NME5/GPM6A/S1PR1/BBS1	5
GO:0001823	mesonephros development	1/180	89/11590	0.753015	1	1	ZBTB16	1
GO:0006368	transcription elongation by RNA polymerase II promoter	1/180	89/11590	0.753015	1	1	CBX7	1
GO:0016525	negative regulation of angiogenesis	1/180	89/11590	0.753015	1	1	PTPRM	1
GO:0060840	artery development	1/180	89/11590	0.753015	1	1	PDE2A	1
GO:0030258	lipid modification	2/180	173/11590	0.753652	1	1	PDK4/IVD	2
GO:0046034	ATP metabolic process	2/180	173/11590	0.753652	1	1	PINK1/SLC4A4	2
GO:0051701	biological process involved in interaction with host	2/180	173/11590	0.753652	1	1	SMPD1/SCARB2	2
GO:0001934	positive regulation of protein phosphorylation	8/180	620/11590	0.753778	1	1	PINK1/AKTIP/TERF2IP/LIMCH1/CAMK1/EDNRB/CREBL2/CLU	8
GO:0016053	organic acid biosynthetic process	3/180	252/11590	0.754467	1	1	ACSM5/RGN/PDK4	3
GO:0031667	response to nutrient levels	5/180	403/11590	0.755132	1	1	GABARAPL1/GABARAPL2/GABARAP/FAM107A/PDK4	5
GO:0008285	negative regulation of cell population proliferation	8/180	621/11590	0.755357	1	1	NDFIP1/CGRRF1/MAGI2/RGN/ZBTB16/RPS6KA2/PTPRM/KLF9	8
GO:0015931	nucleobase-containing compound transport	2/180	174/11590	0.75649	1	1	SLC25A42/SLC25A4	2
GO:0006720	isoprenoid metabolic process	1/180	90/11590	0.756881	1	1	DHRS7	1
GO:0032760	positive regulation of tumor necrosis factor production	1/180	90/11590	0.756881	1	1	CLU	1
GO:0035710	CD4-positive, alpha-beta T cell activation	1/180	90/11590	0.756881	1	1	NDFIP1	1
GO:0043473	pigmentation	1/180	90/11590	0.756881	1	1	EDNRB	1
GO:2000181	negative regulation of blood vessel morphogenesis	1/180	90/11590	0.756881	1	1	PTPRM	1
GO:0019233	sensory perception of pain	1/180	91/11590	0.760686	1	1	EDNRB	1
GO:0031929	TOR signaling	1/180	91/11590	0.760686	1	1	PINK1	1
GO:0042177	negative regulation of protein catabolic process	1/180	91/11590	0.760686	1	1	GABARAPL2	1
GO:0097237	cellular response to toxic substance	1/180	91/11590	0.760686	1	1	PINK1	1
GO:1901343	negative regulation of vasculature development	1/180	91/11590	0.760686	1	1	PTPRM	1
GO:1903707	negative regulation of hemopoiesis	1/180	91/11590	0.760686	1	1	TCTA	1
GO:0005975	carbohydrate metabolic process	6/180	480/11590	0.761448	1	1	CASD1/GABARAPL1/RGN/SLC4A4/PDK4/SCARB2	6
GO:0006897	endocytosis	6/180	480/11590	0.761448	1	1	LMBRD1/MAGI2/VAMP2/SMPD1/CLU/SCARB2	6
GO:0010035	response to inorganic substance	6/180	480/11590	0.761448	1	1	PINK1/SMPD1/KCNK3/EDNRB/DLG2/ADD1	6
GO:0009063	cellular amino acid catabolic process	1/180	92/11590	0.764432	1	1	IVD	1
GO:0031532	actin cytoskeleton reorganization	1/180	92/11590	0.764432	1	1	S1PR1	1
GO:0043500	muscle adaptation	1/180	92/11590	0.764432	1	1	KLF15	1
GO:0055007	cardiac muscle cell differentiation	1/180	92/11590	0.764432	1	1	SORBS2	1
GO:0006875	cellular metal ion homeostasis	4/180	333/11590	0.764597	1	1	NDFIP1/SLC22A17/ISCU/RGN	4
GO:0045892	negative regulation of DNA-templated transcription	13/180	982/11590	0.765999	1	1	PBXIP1/MAGEH1/EID1/CBX7/CPEB3/LDB2/ZBTB16/POU6F1/PER1/PDE2A/EDNRB/CRY2/APBB1	13
GO:0009914	hormone transport	3/180	257/11590	0.766187	1	1	PTPRN2/CRY2/CPE	3
GO:1903507	negative regulation of nucleic acid-templated transcription	13/180	983/11590	0.767249	1	1	PBXIP1/MAGEH1/EID1/CBX7/CPEB3/LDB2/ZBTB16/POU6F1/PER1/PDE2A/EDNRB/CRY2/APBB1	13
GO:0008016	regulation of heart contraction	2/180	178/11590	0.767563	1	1	SCN1B/EDNRB	2
GO:0045619	regulation of lymphocyte differentiation	2/180	178/11590	0.767563	1	1	NDFIP1/ZBTB16	2
GO:1901654	response to ketone	2/180	178/11590	0.767563	1	1	WBP2/KLF9	2
GO:0120034	positive regulation of plasma membrane bounded cell projection assembly	1/180	93/11590	0.76812	1	1	GPM6A	1
GO:1903557	positive regulation of tumor necrosis factor superfamily cytokine production	1/180	93/11590	0.76812	1	1	CLU	1
GO:0043161	proteasome-mediated ubiquitin-dependent protein catabolic process	4/180	335/11590	0.768665	1	1	FBXL5/GABARAP/DNAJB9/CLU	4
GO:0034330	cell junction organization	7/180	558/11590	0.769853	1	1	LIMCH1/FAM107A/MPDZ/CAMK1/GPM6A/ARHGAP6/ADD1	7
GO:0006836	neurotransmitter transport	2/180	179/11590	0.770262	1	1	VAMP2/PTPRN2	2
GO:0001933	negative regulation of protein phosphorylation	3/180	259/11590	0.770747	1	1	TERF2IP/RGN/SMPD1	3
GO:0002224	toll-like receptor signaling pathway	1/180	94/11590	0.771751	1	1	PJA2	1
GO:0002444	myeloid leukocyte mediated immunity	1/180	94/11590	0.771751	1	1	VAMP2	1
GO:0006413	translational initiation	1/180	94/11590	0.771751	1	1	HABP4	1
GO:0060341	regulation of cellular localization	10/180	775/11590	0.771896	1	1	NDFIP1/RIC3/PINK1/VPS11/SERGEF/ISCU/CAMK1/REEP5/VAMP2/APBB1	10
GO:0034504	protein localization to nucleus	3/180	260/11590	0.773	1	1	SYNE1/ZBTB16/CRY2	3
GO:0000956	nuclear-transcribed mRNA catabolic process	1/180	95/11590	0.775324	1	1	CPEB3	1
GO:0051261	protein depolymerization	1/180	95/11590	0.775324	1	1	ADD1	1
GO:0071901	negative regulation of protein serine/threonine kinase activity	1/180	95/11590	0.775324	1	1	SMPD1	1
GO:0072676	lymphocyte migration	1/180	95/11590	0.775324	1	1	S1PR1	1
GO:0002573	myeloid leukocyte differentiation	2/180	181/11590	0.77558	1	1	NDFIP1/TCTA	2
GO:0031175	neuron projection development	10/180	778/11590	0.775977	1	1	DIXDC1/CPEB3/MAGI2/CAMK1/SCN1B/PTPRM/GPM6A/SCARB2/BBS1/APBB1	10
GO:0006402	mRNA catabolic process	2/180	182/11590	0.778198	1	1	CPEB3/CIRBP	2
GO:0002062	chondrocyte differentiation	1/180	96/11590	0.778843	1	1	ZBTB16	1
GO:0022037	metencephalon development	1/180	96/11590	0.778843	1	1	DIXDC1	1
GO:0043200	response to amino acid	1/180	96/11590	0.778843	1	1	CPEB3	1
GO:0007276	gamete generation	6/180	491/11590	0.780089	1	1	PACRG/SYNE1/RGN/NME5/ZBTB16/RPS6KA2	6
GO:1901137	carbohydrate derivative biosynthetic process	6/180	491/11590	0.780089	1	1	PINK1/CRYL1/ITM2B/NME5/TK2/PDK4	6
GO:0043408	regulation of MAPK cascade	7/180	565/11590	0.780825	1	1	DIXDC1/PINK1/SHC2/ARL6IP5/PJA2/SMPD1/PER1	7
GO:1902105	regulation of leukocyte differentiation	3/180	264/11590	0.781832	1	1	NDFIP1/ZBTB16/TCTA	3
GO:0021761	limbic system development	1/180	97/11590	0.782306	1	1	BBS1	1
GO:0046632	alpha-beta T cell differentiation	1/180	97/11590	0.782306	1	1	ZBTB16	1
GO:0051897	positive regulation of protein kinase B signaling	1/180	97/11590	0.782306	1	1	PINK1	1
GO:0045936	negative regulation of phosphate metabolic process	4/180	342/11590	0.782476	1	1	TERF2IP/RGN/SMPD1/CRY2	4
GO:0009612	response to mechanical stimulus	2/180	184/11590	0.783356	1	1	HABP4/PDE2A	2
GO:0010563	negative regulation of phosphorus metabolic process	4/180	343/11590	0.784395	1	1	TERF2IP/RGN/SMPD1/CRY2	4
GO:0001505	regulation of neurotransmitter levels	2/180	185/11590	0.785895	1	1	VAMP2/PTPRN2	2
GO:0071824	protein-DNA complex subunit organization	2/180	185/11590	0.785895	1	1	TSPYL1/NAP1L2	2
GO:0070588	calcium ion transmembrane transport	3/180	267/11590	0.78827	1	1	RGN/GPM6A/EDNRB	3
GO:0097435	supramolecular fiber organization	8/180	643/11590	0.788321	1	1	KANK3/LIMCH1/FAM107A/SORBS2/S1PR1/CLU/ARHGAP6/ADD1	8
GO:0033673	negative regulation of kinase activity	2/180	186/11590	0.788408	1	1	RGN/SMPD1	2
GO:0051651	maintenance of location in cell	2/180	186/11590	0.788408	1	1	PINK1/SYNE1	2
GO:0007417	central nervous system development	11/180	859/11590	0.788643	1	1	DIXDC1/NME5/ZBTB16/SCN1B/POU6F1/KCNK3/S1PR1/CLN5/CLU/BTD/BBS1	11
GO:0030203	glycosaminoglycan metabolic process	1/180	99/11590	0.789072	1	1	EDNRB	1
GO:0098659	inorganic cation import across plasma membrane	1/180	99/11590	0.789072	1	1	ISCU	1
GO:0099587	inorganic ion import across plasma membrane	1/180	99/11590	0.789072	1	1	ISCU	1
GO:2000027	regulation of animal organ morphogenesis	1/180	99/11590	0.789072	1	1	MAGI2	1
GO:0006338	chromatin remodeling	3/180	268/11590	0.790382	1	1	WBP2/TSPYL1/NAP1L2	3
GO:0008202	steroid metabolic process	3/180	268/11590	0.790382	1	1	PDE8B/SMPD1/EDNRB	3
GO:1990778	protein localization to cell periphery	3/180	268/11590	0.790382	1	1	ARL6IP5/VAMP2/BBS1	3
GO:0010638	positive regulation of organelle organization	5/180	423/11590	0.791347	1	1	PINK1/MOAP1/TERF2IP/LIMCH1/SLC25A4	5
GO:0030326	embryonic limb morphogenesis	1/180	100/11590	0.792376	1	1	ZBTB16	1
GO:0035113	embryonic appendage morphogenesis	1/180	100/11590	0.792376	1	1	ZBTB16	1
GO:0030072	peptide hormone secretion	2/180	188/11590	0.793357	1	1	PTPRN2/CPE	2
GO:0000165	MAPK cascade	8/180	648/11590	0.795341	1	1	DIXDC1/PINK1/SHC2/ARL6IP5/PJA2/SMPD1/MAPK10/PER1	8
GO:0006954	inflammatory response	8/180	648/11590	0.795341	1	1	NDFIP1/PBXIP1/PJA2/PER1/PDE2A/F8/EDNRB/CLU	8
GO:0046822	regulation of nucleocytoplasmic transport	1/180	101/11590	0.795629	1	1	CAMK1	1
GO:0051047	positive regulation of secretion	3/180	271/11590	0.796611	1	1	PINK1/EDNRB/APBB1	3
GO:0000082	G1/S transition of mitotic cell cycle	2/180	190/11590	0.798204	1	1	FAM107A/FHL1	2
GO:0072593	reactive oxygen species metabolic process	2/180	190/11590	0.798204	1	1	PINK1/PDK4	2
GO:0030282	bone mineralization	1/180	102/11590	0.79883	1	1	S1PR1	1
GO:0019953	sexual reproduction	7/180	578/11590	0.800174	1	1	PACRG/SYNE1/RGN/NME5/ZBTB16/RPS6KA2/BBS1	7
GO:0007411	axon guidance	2/180	191/11590	0.80059	1	1	SCN1B/PTPRM	2
GO:0009991	response to extracellular stimulus	5/180	429/11590	0.801367	1	1	GABARAPL1/GABARAPL2/GABARAP/FAM107A/PDK4	5
GO:0007224	smoothened signaling pathway	1/180	103/11590	0.801982	1	1	TXNDC15	1
GO:0008286	insulin receptor signaling pathway	1/180	103/11590	0.801982	1	1	PDK4	1
GO:0021782	glial cell development	1/180	103/11590	0.801982	1	1	CLU	1
GO:0034968	histone lysine methylation	1/180	103/11590	0.801982	1	1	PHF1	1
GO:2000779	regulation of double-strand break repair	1/180	103/11590	0.801982	1	1	TERF2IP	1
GO:0051235	maintenance of location	3/180	274/11590	0.802686	1	1	PINK1/SYNE1/CRY2	3
GO:0002790	peptide secretion	2/180	192/11590	0.802951	1	1	PTPRN2/CPE	2
GO:0045930	negative regulation of mitotic cell cycle	2/180	192/11590	0.802951	1	1	FAM107A/FHL1	2
GO:0048738	cardiac muscle tissue development	2/180	192/11590	0.802951	1	1	SORBS2/S1PR1	2
GO:0097485	neuron projection guidance	2/180	192/11590	0.802951	1	1	SCN1B/PTPRM	2
GO:0050804	modulation of chemical synaptic transmission	4/180	354/11590	0.804633	1	1	PINK1/CPEB3/FAM107A/VAMP2	4
GO:0045582	positive regulation of T cell differentiation	1/180	104/11590	0.805085	1	1	ZBTB16	1
GO:0050868	negative regulation of T cell activation	1/180	104/11590	0.805085	1	1	NDFIP1	1
GO:0051147	regulation of muscle cell differentiation	1/180	104/11590	0.805085	1	1	CAMK1	1
GO:0010001	glial cell differentiation	2/180	193/11590	0.805287	1	1	KLF15/CLU	2
GO:0046395	carboxylic acid catabolic process	2/180	193/11590	0.805287	1	1	CRYL1/IVD	2
GO:0060348	bone development	2/180	193/11590	0.805287	1	1	RGN/ZBTB16	2
GO:0099177	regulation of trans-synaptic signaling	4/180	355/11590	0.806395	1	1	PINK1/CPEB3/FAM107A/VAMP2	4
GO:0010506	regulation of autophagy	3/180	276/11590	0.806651	1	1	PINK1/MOAP1/SLC25A4	3
GO:0019318	hexose metabolic process	2/180	194/11590	0.807598	1	1	RGN/PDK4	2
GO:0007156	homophilic cell adhesion via plasma membrane adhesion molecules	1/180	105/11590	0.80814	1	1	PTPRM	1
GO:0007606	sensory perception of chemical stimulus	1/180	105/11590	0.80814	1	1	BBS1	1
GO:0043244	regulation of protein-containing complex disassembly	1/180	105/11590	0.80814	1	1	ADD1	1
GO:2000278	regulation of DNA biosynthetic process	1/180	105/11590	0.80814	1	1	RGN	1
GO:0006412	translation	6/180	509/11590	0.808216	1	1	PINK1/HABP4/CPEB3/SECISBP2L/PER1/CIRBP	6
GO:0051090	regulation of DNA-binding transcription factor activity	4/180	357/11590	0.80988	1	1	PINK1/TERF2IP/MAPK10/CLU	4
GO:0006022	aminoglycan metabolic process	1/180	106/11590	0.811147	1	1	EDNRB	1
GO:0090101	negative regulation of transmembrane receptor protein serine/threonine kinase signaling pathway	1/180	106/11590	0.811147	1	1	MAGI2	1
GO:0060560	developmental growth involved in morphogenesis	2/180	196/11590	0.812149	1	1	MAGI2/S1PR1	2
GO:0002698	negative regulation of immune effector process	1/180	107/11590	0.814107	1	1	NDFIP1	1
GO:0051101	regulation of DNA binding	1/180	107/11590	0.814107	1	1	HABP4	1
GO:0071333	cellular response to glucose stimulus	1/180	107/11590	0.814107	1	1	PTPRN2	1
GO:0016054	organic acid catabolic process	2/180	197/11590	0.814388	1	1	CRYL1/IVD	2
GO:0097191	extrinsic apoptotic signaling pathway	2/180	197/11590	0.814388	1	1	MOAP1/GABARAP	2
GO:0010243	response to organonitrogen compound	11/180	881/11590	0.814859	1	1	UBXN6/KLF15/CPEB3/VAMP2/SMPD1/PER1/PDK4/PDE2A/DNAJB9/EDNRB/CRY2	11
GO:0062197	cellular response to chemical stress	3/180	282/11590	0.818149	1	1	PINK1/ARL6IP5/NME5	3
GO:0060627	regulation of vesicle-mediated transport	5/180	440/11590	0.818757	1	1	VPS11/MAGI2/VAMP2/SMPD1/CLU	5
GO:0001101	response to acid chemical	1/180	109/11590	0.819889	1	1	CPEB3	1
GO:0003014	renal system process	1/180	109/11590	0.819889	1	1	EDNRB	1
GO:0043280	positive regulation of cysteine-type endopeptidase activity involved in apoptotic process	1/180	109/11590	0.819889	1	1	ARL6IP5	1
GO:0048593	camera-type eye morphogenesis	1/180	109/11590	0.819889	1	1	PTPRM	1
GO:0071331	cellular response to hexose stimulus	1/180	109/11590	0.819889	1	1	PTPRN2	1
GO:0008654	phospholipid biosynthetic process	2/180	200/11590	0.820965	1	1	SERINC1/ABCA8	2
GO:0018022	peptidyl-lysine methylation	1/180	110/11590	0.822713	1	1	PHF1	1
GO:0042542	response to hydrogen peroxide	1/180	110/11590	0.822713	1	1	PINK1	1
GO:1901652	response to peptide	5/180	443/11590	0.823284	1	1	KLF15/VAMP2/PDK4/EDNRB/CRY2	5
GO:0007409	axonogenesis	4/180	365/11590	0.823314	1	1	DIXDC1/SCN1B/PTPRM/APBB1	4
GO:0048609	multicellular organismal reproductive process	7/180	596/11590	0.824807	1	1	PACRG/SYNE1/RGN/NME5/ZBTB16/RPS6KA2/EDNRB	7
GO:0007030	Golgi organization	1/180	111/11590	0.825493	1	1	SYNE1	1
GO:0051928	positive regulation of calcium ion transport	1/180	111/11590	0.825493	1	1	RGN	1
GO:0071326	cellular response to monosaccharide stimulus	1/180	111/11590	0.825493	1	1	PTPRN2	1
GO:0048871	multicellular organismal homeostasis	5/180	445/11590	0.826251	1	1	LDB2/PDK4/EDNRB/S1PR1/BBS1	5
GO:0000086	G2/M transition of mitotic cell cycle	1/180	112/11590	0.828229	1	1	FHL1	1
GO:0007605	sensory perception of sound	1/180	112/11590	0.828229	1	1	SCARB2	1
GO:0021537	telencephalon development	2/180	204/11590	0.829409	1	1	DIXDC1/BBS1	2
GO:0050673	epithelial cell proliferation	4/180	369/11590	0.829735	1	1	RGN/PTPRM/EDNRB/KLF9	4
GO:0009410	response to xenobiotic stimulus	4/180	370/11590	0.83131	1	1	CBX7/SMPD1/PTPRM/KCNK3	4
GO:0030595	leukocyte chemotaxis	2/180	205/11590	0.831464	1	1	EDNRB/S1PR1	2
GO:0006644	phospholipid metabolic process	3/180	290/11590	0.832579	1	1	SERINC1/ABCA8/SMPD1	3
GO:0003013	circulatory system process	6/180	527/11590	0.833486	1	1	ATP8A1/SLC4A4/SCN1B/RPS6KA2/PDE2A/EDNRB	6
GO:0120035	regulation of plasma membrane bounded cell projection organization	6/180	527/11590	0.833486	1	1	DIXDC1/MAGI2/CAMK1/SCN1B/GPM6A/SCARB2	6
GO:0005996	monosaccharide metabolic process	2/180	206/11590	0.833497	1	1	RGN/PDK4	2
GO:0003206	cardiac chamber morphogenesis	1/180	114/11590	0.833575	1	1	CPE	1
GO:0050714	positive regulation of protein secretion	1/180	114/11590	0.833575	1	1	APBB1	1
GO:1903038	negative regulation of leukocyte cell-cell adhesion	1/180	114/11590	0.833575	1	1	NDFIP1	1
GO:0002440	production of molecular mediator of immune response	2/180	207/11590	0.835507	1	1	NDFIP1/DNAJB9	2
GO:0014706	striated muscle tissue development	2/180	207/11590	0.835507	1	1	SORBS2/S1PR1	2
GO:0043043	peptide biosynthetic process	6/180	529/11590	0.836123	1	1	PINK1/HABP4/CPEB3/SECISBP2L/PER1/CIRBP	6
GO:0006865	amino acid transport	1/180	115/11590	0.836185	1	1	ARL6IP5	1
GO:0007266	Rho protein signal transduction	1/180	115/11590	0.836185	1	1	ARHGAP6	1
GO:0007292	female gamete generation	1/180	115/11590	0.836185	1	1	RPS6KA2	1
GO:0048565	digestive tract development	1/180	115/11590	0.836185	1	1	EDNRB	1
GO:0050864	regulation of B cell activation	1/180	115/11590	0.836185	1	1	NDFIP1	1
GO:0051348	negative regulation of transferase activity	2/180	208/11590	0.837496	1	1	RGN/SMPD1	2
GO:0009968	negative regulation of signal transduction	12/180	975/11590	0.838056	1	1	PINK1/VPS11/MAGI2/GPRASP1/NME5/SMPD1/PER1/PDE2A/DNAJB9/CRY2/CLU/SLC25A4	12
GO:0002702	positive regulation of production of molecular mediator of immune response	1/180	116/11590	0.838755	1	1	DNAJB9	1
GO:0070555	response to interleukin-1	1/180	116/11590	0.838755	1	1	SMPD1	1
GO:0050727	regulation of inflammatory response	3/180	295/11590	0.841092	1	1	NDFIP1/PDE2A/EDNRB	3
GO:0044272	sulfur compound biosynthetic process	1/180	117/11590	0.841284	1	1	PDK4	1
GO:0045621	positive regulation of lymphocyte differentiation	1/180	117/11590	0.841284	1	1	ZBTB16	1
GO:0051783	regulation of nuclear division	1/180	117/11590	0.841284	1	1	RPS6KA2	1
GO:0050708	regulation of protein secretion	2/180	210/11590	0.841409	1	1	SERGEF/APBB1	2
GO:0098657	import into cell	2/180	210/11590	0.841409	1	1	ISCU/ARL6IP5	2
GO:0006936	muscle contraction	3/180	296/11590	0.84275	1	1	SCN1B/EDNRB/APBB1	3
GO:0015833	peptide transport	2/180	211/11590	0.843333	1	1	PTPRN2/CPE	2
GO:0045926	negative regulation of growth	2/180	211/11590	0.843333	1	1	CGRRF1/FHL1	2
GO:0008203	cholesterol metabolic process	1/180	118/11590	0.843774	1	1	SMPD1	1
GO:0031644	regulation of nervous system process	1/180	118/11590	0.843774	1	1	EDNRB	1
GO:0035107	appendage morphogenesis	1/180	118/11590	0.843774	1	1	ZBTB16	1
GO:0035108	limb morphogenesis	1/180	118/11590	0.843774	1	1	ZBTB16	1
GO:1903825	organic acid transmembrane transport	1/180	118/11590	0.843774	1	1	ARL6IP5	1
GO:1905039	carboxylic acid transmembrane transport	1/180	118/11590	0.843774	1	1	ARL6IP5	1
GO:0042326	negative regulation of phosphorylation	3/180	297/11590	0.844392	1	1	TERF2IP/RGN/SMPD1	3
GO:0046486	glycerolipid metabolic process	3/180	297/11590	0.844392	1	1	LMF1/SERINC1/RGN	3
GO:0010212	response to ionizing radiation	1/180	119/11590	0.846226	1	1	SMPD1	1
GO:0031023	microtubule organizing center organization	1/180	119/11590	0.846226	1	1	MPDZ	1
GO:0035051	cardiocyte differentiation	1/180	119/11590	0.846226	1	1	SORBS2	1
GO:0031344	regulation of cell projection organization	6/180	537/11590	0.846342	1	1	DIXDC1/MAGI2/CAMK1/SCN1B/GPM6A/SCARB2	6
GO:0032880	regulation of protein localization	8/180	689/11590	0.846524	1	1	NDFIP1/RIC3/PINK1/VPS11/SERGEF/CAMK1/VAMP2/APBB1	8
GO:0003007	heart morphogenesis	2/180	213/11590	0.847118	1	1	S1PR1/CPE	2
GO:0007188	adenylate cyclase-modulating G protein-coupled receptor signaling pathway	2/180	213/11590	0.847118	1	1	PDE2A/S1PR1	2
GO:0048667	cell morphogenesis involved in neuron differentiation	5/180	461/11590	0.848572	1	1	DIXDC1/SCN1B/PTPRM/BBS1/APBB1	5
GO:0001936	regulation of endothelial cell proliferation	1/180	120/11590	0.848639	1	1	PTPRM	1
GO:0046903	secretion	9/180	766/11590	0.849053	1	1	PINK1/VPS11/SERGEF/VAMP2/PTPRN2/EDNRB/CRY2/CPE/APBB1	9
GO:0007420	brain development	7/180	617/11590	0.850499	1	1	DIXDC1/NME5/POU6F1/KCNK3/S1PR1/CLN5/BBS1	7
GO:0000723	telomere maintenance	1/180	121/11590	0.851014	1	1	TERF2IP	1
GO:0050905	neuromuscular process	1/180	121/11590	0.851014	1	1	PDE8B	1
GO:0006066	alcohol metabolic process	3/180	302/11590	0.852385	1	1	DHRS7/SMPD1/EDNRB	3
GO:0050728	negative regulation of inflammatory response	1/180	122/11590	0.853352	1	1	NDFIP1	1
GO:0050729	positive regulation of inflammatory response	1/180	122/11590	0.853352	1	1	PDE2A	1
GO:0055123	digestive system development	1/180	122/11590	0.853352	1	1	EDNRB	1
GO:0060048	cardiac muscle contraction	1/180	122/11590	0.853352	1	1	SCN1B	1
GO:0006401	RNA catabolic process	2/180	217/11590	0.854443	1	1	CPEB3/CIRBP	2
GO:0010469	regulation of signaling receptor activity	1/180	123/11590	0.855654	1	1	PINK1	1
GO:0030534	adult behavior	1/180	123/11590	0.855654	1	1	BBS1	1
GO:0040029	epigenetic regulation of gene expression	1/180	123/11590	0.855654	1	1	WBP2	1
GO:0042552	myelination	1/180	123/11590	0.855654	1	1	CLU	1
GO:1903900	regulation of viral life cycle	1/180	123/11590	0.855654	1	1	SMPD1	1
GO:2000377	regulation of reactive oxygen species metabolic process	1/180	123/11590	0.855654	1	1	PINK1	1
GO:2001056	positive regulation of cysteine-type endopeptidase activity	1/180	123/11590	0.855654	1	1	ARL6IP5	1
GO:0000724	double-strand break repair via homologous recombination	1/180	124/11590	0.85792	1	1	TERF2IP	1
GO:0007043	cell-cell junction assembly	1/180	124/11590	0.85792	1	1	MPDZ	1
GO:0009566	fertilization	1/180	124/11590	0.85792	1	1	BBS1	1
GO:0034614	cellular response to reactive oxygen species	1/180	124/11590	0.85792	1	1	PINK1	1
GO:0044839	cell cycle G2/M phase transition	1/180	124/11590	0.85792	1	1	FHL1	1
GO:0032504	multicellular organism reproduction	7/180	624/11590	0.858365	1	1	PACRG/SYNE1/RGN/NME5/ZBTB16/RPS6KA2/EDNRB	7
GO:0002181	cytoplasmic translation	1/180	125/11590	0.86015	1	1	CPEB3	1
GO:0007272	ensheathment of neurons	1/180	125/11590	0.86015	1	1	CLU	1
GO:0008366	axon ensheathment	1/180	125/11590	0.86015	1	1	CLU	1
GO:1903522	regulation of blood circulation	2/180	221/11590	0.861447	1	1	SCN1B/EDNRB	2
GO:0001508	action potential	1/180	126/11590	0.862346	1	1	SCN1B	1
GO:1902652	secondary alcohol metabolic process	1/180	126/11590	0.862346	1	1	SMPD1	1
GO:0000226	microtubule cytoskeleton organization	5/180	473/11590	0.863725	1	1	DIXDC1/GABARAP/FAM107A/MPDZ/BBS1	5
GO:0000725	recombinational repair	1/180	127/11590	0.864507	1	1	TERF2IP	1
GO:0001889	liver development	1/180	127/11590	0.864507	1	1	RGN	1
GO:0140013	meiotic nuclear division	1/180	127/11590	0.864507	1	1	RPS6KA2	1
GO:0007189	adenylate cyclase-activating G protein-coupled receptor signaling pathway	1/180	128/11590	0.866635	1	1	S1PR1	1
GO:0032200	telomere organization	1/180	128/11590	0.866635	1	1	TERF2IP	1
GO:0050921	positive regulation of chemotaxis	1/180	128/11590	0.866635	1	1	S1PR1	1
GO:0050954	sensory perception of mechanical stimulus	1/180	128/11590	0.866635	1	1	SCARB2	1
GO:0007519	skeletal muscle tissue development	1/180	129/11590	0.868729	1	1	HLF	1
GO:0016125	sterol metabolic process	1/180	129/11590	0.868729	1	1	SMPD1	1
GO:0032147	activation of protein kinase activity	1/180	129/11590	0.868729	1	1	PINK1	1
GO:0030856	regulation of epithelial cell differentiation	1/180	130/11590	0.870791	1	1	ADD1	1
GO:0061008	hepaticobiliary system development	1/180	130/11590	0.870791	1	1	RGN	1
GO:1903530	regulation of secretion by cell	5/180	480/11590	0.871967	1	1	PINK1/SERGEF/VAMP2/CRY2/APBB1	5
GO:0007416	synapse assembly	1/180	131/11590	0.87282	1	1	GPM6A	1
GO:0019752	carboxylic acid metabolic process	8/180	715/11590	0.873396	1	1	ACBD4/ACSM5/CRYL1/RGN/SLC4A4/PDK4/IVD/BTD	8
GO:0070997	neuron death	3/180	317/11590	0.874264	1	1	PINK1/ARL6IP5/CLU	3
GO:0016571	histone methylation	1/180	132/11590	0.874818	1	1	PHF1	1
GO:0030183	B cell differentiation	1/180	132/11590	0.874818	1	1	DNAJB9	1
GO:0043524	negative regulation of neuron apoptotic process	1/180	132/11590	0.874818	1	1	PINK1	1
GO:0048660	regulation of smooth muscle cell proliferation	1/180	132/11590	0.874818	1	1	S1PR1	1
GO:0043085	positive regulation of catalytic activity	11/180	943/11590	0.875775	1	1	APH1B/PINK1/SERINC1/ISCU/ARL6IP5/MAGI2/RGN/CAMK1/S1PR1/CLU/ARHGAP6	11
GO:1903311	regulation of mRNA metabolic process	2/180	230/11590	0.876098	1	1	CPEB3/CIRBP	2
GO:0051168	nuclear export	1/180	133/11590	0.876785	1	1	CAMK1	1
GO:0061564	axon development	4/180	404/11590	0.87807	1	1	DIXDC1/SCN1B/PTPRM/APBB1	4
GO:0001935	endothelial cell proliferation	1/180	134/11590	0.878721	1	1	PTPRM	1
GO:0030902	hindbrain development	1/180	134/11590	0.878721	1	1	DIXDC1	1
GO:1901653	cellular response to peptide	3/180	321/11590	0.879595	1	1	KLF15/VAMP2/PDK4	3
GO:0035150	regulation of tube size	1/180	135/11590	0.880626	1	1	EDNRB	1
GO:0035296	regulation of tube diameter	1/180	135/11590	0.880626	1	1	EDNRB	1
GO:0097746	blood vessel diameter maintenance	1/180	135/11590	0.880626	1	1	EDNRB	1
GO:0030855	epithelial cell differentiation	6/180	568/11590	0.881179	1	1	KLF15/MAGI2/PDE2A/EDNRB/S1PR1/ADD1	6
GO:0016049	cell growth	4/180	407/11590	0.881604	1	1	FAM107A/CGRRF1/SORBS2/FHL1	4
GO:0048592	eye morphogenesis	1/180	136/11590	0.882502	1	1	PTPRM	1
GO:0048659	smooth muscle cell proliferation	1/180	136/11590	0.882502	1	1	S1PR1	1
GO:0051250	negative regulation of lymphocyte activation	1/180	136/11590	0.882502	1	1	NDFIP1	1
GO:0021953	central nervous system neuron differentiation	1/180	137/11590	0.884348	1	1	SCN1B	1
GO:1901698	response to nitrogen compound	11/180	955/11590	0.885495	1	1	UBXN6/KLF15/CPEB3/VAMP2/SMPD1/PER1/PDK4/PDE2A/DNAJB9/EDNRB/CRY2	11
GO:1903706	regulation of hemopoiesis	3/180	326/11590	0.885978	1	1	NDFIP1/ZBTB16/TCTA	3
GO:0031503	protein-containing complex localization	1/180	138/11590	0.886166	1	1	DLG2	1
GO:0050770	regulation of axonogenesis	1/180	138/11590	0.886166	1	1	DIXDC1	1
GO:0060538	skeletal muscle organ development	1/180	138/11590	0.886166	1	1	HLF	1
GO:0043410	positive regulation of MAPK cascade	4/180	413/11590	0.88841	1	1	DIXDC1/SHC2/ARL6IP5/PJA2	4
GO:0030099	myeloid cell differentiation	3/180	328/11590	0.888446	1	1	NDFIP1/ZBTB16/TCTA	3
GO:0031214	biomineral tissue development	1/180	140/11590	0.889717	1	1	S1PR1	1
GO:0043436	oxoacid metabolic process	8/180	734/11590	0.890521	1	1	ACBD4/ACSM5/CRYL1/RGN/SLC4A4/PDK4/IVD/BTD	8
GO:0051056	regulation of small GTPase mediated signal transduction	2/180	240/11590	0.890702	1	1	GABARAP/ARHGAP6	2
GO:0051093	negative regulation of developmental process	8/180	735/11590	0.891367	1	1	DIXDC1/NDFIP1/PINK1/RGN/ZBTB16/TCTA/PTPRM/EDNRB	8
GO:0050792	regulation of viral process	1/180	141/11590	0.89145	1	1	SMPD1	1
GO:0060322	head development	7/180	658/11590	0.891944	1	1	DIXDC1/NME5/POU6F1/KCNK3/S1PR1/CLN5/BBS1	7
GO:0060485	mesenchyme development	2/180	241/11590	0.892072	1	1	CRELD1/EDNRB	2
GO:0006606	protein import into nucleus	1/180	142/11590	0.893157	1	1	CRY2	1
GO:1903046	meiotic cell cycle process	1/180	142/11590	0.893157	1	1	RPS6KA2	1
GO:0002366	leukocyte activation involved in immune response	2/180	242/11590	0.893425	1	1	NDFIP1/VAMP2	2
GO:0006310	DNA recombination	2/180	242/11590	0.893425	1	1	NDFIP1/TERF2IP	2
GO:0042886	amide transport	2/180	242/11590	0.893425	1	1	PTPRN2/CPE	2
GO:0042113	B cell activation	2/180	243/11590	0.894763	1	1	NDFIP1/DNAJB9	2
GO:0006082	organic acid metabolic process	8/180	740/11590	0.895516	1	1	ACBD4/ACSM5/CRYL1/RGN/SLC4A4/PDK4/IVD/BTD	8
GO:0032640	tumor necrosis factor production	1/180	144/11590	0.89649	1	1	CLU	1
GO:0032680	regulation of tumor necrosis factor production	1/180	144/11590	0.89649	1	1	CLU	1
GO:2000145	regulation of cell motility	9/180	819/11590	0.897159	1	1	LIMCH1/FAM107A/ATP8A1/MAGI2/RGN/LDB2/PTPRM/S1PR1/BBS1	9
GO:0002443	leukocyte mediated immunity	3/180	336/11590	0.89785	1	1	NDFIP1/VAMP2/CLU	3
GO:0048736	appendage development	1/180	145/11590	0.898118	1	1	ZBTB16	1
GO:0060173	limb development	1/180	145/11590	0.898118	1	1	ZBTB16	1
GO:0110148	biomineralization	1/180	145/11590	0.898118	1	1	S1PR1	1
GO:0002263	cell activation involved in immune response	2/180	246/11590	0.898685	1	1	NDFIP1/VAMP2	2
GO:0016042	lipid catabolic process	2/180	246/11590	0.898685	1	1	SMPD1/IVD	2
GO:0003006	developmental process involved in reproduction	7/180	666/11590	0.898802	1	1	PACRG/CBX7/SYNE1/RGN/NME5/ZBTB16/RPS6KA2	7
GO:0002221	pattern recognition receptor signaling pathway	1/180	146/11590	0.899721	1	1	PJA2	1
GO:0048839	inner ear development	1/180	146/11590	0.899721	1	1	KCNK3	1
GO:0051170	import into nucleus	1/180	146/11590	0.899721	1	1	CRY2	1
GO:1990845	adaptive thermogenesis	1/180	146/11590	0.899721	1	1	SLC25A4	1
GO:1901987	regulation of cell cycle phase transition	3/180	339/11590	0.901189	1	1	FAM107A/FHL1/APBB1	3
GO:1903532	positive regulation of secretion by cell	2/180	248/11590	0.901223	1	1	PINK1/APBB1	2
GO:0002706	regulation of lymphocyte mediated immunity	1/180	147/11590	0.901298	1	1	NDFIP1	1
GO:0071706	tumor necrosis factor superfamily cytokine production	1/180	147/11590	0.901298	1	1	CLU	1
GO:1903169	regulation of calcium ion transmembrane transport	1/180	147/11590	0.901298	1	1	RGN	1
GO:1903555	regulation of tumor necrosis factor superfamily cytokine production	1/180	147/11590	0.901298	1	1	CLU	1
GO:0001932	regulation of protein phosphorylation	10/180	902/11590	0.902166	1	1	PINK1/AKTIP/TERF2IP/LIMCH1/RGN/CAMK1/SMPD1/EDNRB/CREBL2/CLU	10
GO:0045860	positive regulation of protein kinase activity	3/180	340/11590	0.902281	1	1	PINK1/CAMK1/CLU	3
GO:0051302	regulation of cell division	1/180	148/11590	0.90285	1	1	NAP1L2	1
GO:0060537	muscle tissue development	3/180	341/11590	0.903361	1	1	SORBS2/HLF/S1PR1	3
GO:0019827	stem cell population maintenance	1/180	149/11590	0.904379	1	1	LDB2	1
GO:0048812	neuron projection morphogenesis	5/180	512/11590	0.904496	1	1	DIXDC1/SCN1B/PTPRM/GPM6A/APBB1	5
GO:0042129	regulation of T cell proliferation	1/180	150/11590	0.905883	1	1	NDFIP1	1
GO:0001558	regulation of cell growth	3/180	344/11590	0.906539	1	1	FAM107A/CGRRF1/FHL1	3
GO:0002449	lymphocyte mediated immunity	2/180	253/11590	0.907314	1	1	NDFIP1/CLU	2
GO:0002822	regulation of adaptive immune response based on somatic recombination of immune receptors built from immunoglobulin superfamily domains	1/180	151/11590	0.907364	1	1	NDFIP1	1
GO:0006694	steroid biosynthetic process	1/180	151/11590	0.907364	1	1	PDE8B	1
GO:0010594	regulation of endothelial cell migration	1/180	151/11590	0.907364	1	1	PTPRM	1
GO:0030073	insulin secretion	1/180	151/11590	0.907364	1	1	PTPRN2	1
GO:0055001	muscle cell development	1/180	151/11590	0.907364	1	1	SORBS2	1
GO:0001666	response to hypoxia	2/180	254/11590	0.908489	1	1	PINK1/KCNK3	2
[truncated: 495 more rows]

## Sheet: MF
ID	Description	GeneRatio	BgRatio	pvalue	p.adjust	qvalue	geneID	Count
GO:0050811	GABA receptor binding	3/185	15/11755	0.00151793	0.364227	0.360467	GABARAPL1/GABARAPL2/GABARAP	3
GO:0004115	3',5'-cyclic-AMP phosphodiesterase activity	3/185	16/11755	0.00184671	0.364227	0.360467	PDE7B/PDE8B/PDE2A	3
GO:0048487	beta-tubulin binding	4/185	37/11755	0.00261407	0.364227	0.360467	PACRG/GABARAPL1/GABARAPL2/GABARAP	4
GO:0004114	3',5'-cyclic-nucleotide phosphodiesterase activity	3/185	23/11755	0.00538681	0.476292	0.471374	PDE7B/PDE8B/PDE2A	3
GO:0050699	WW domain binding	3/185	24/11755	0.00608591	0.476292	0.471374	NDFIP1/TCEAL4/TCEAL1	3
GO:0004112	cyclic-nucleotide phosphodiesterase activity	3/185	25/11755	0.00683672	0.476292	0.471374	PDE7B/PDE8B/PDE2A	3
GO:0019205	nucleobase-containing compound kinase activity	3/185	27/11755	0.00849705	0.507395	0.502156	NME5/TK2/DLG2	3
GO:0005347	ATP transmembrane transporter activity	2/185	10/11755	0.0102024	0.533073	0.527569	SLC25A42/SLC25A4	2
GO:0000295	adenine nucleotide transmembrane transporter activity	2/185	13/11755	0.0171452	0.681523	0.674487	SLC25A42/SLC25A4	2
GO:0005346	purine ribonucleotide transmembrane transporter activity	2/185	13/11755	0.0171452	0.681523	0.674487	SLC25A42/SLC25A4	2
GO:0001222	transcription corepressor binding	3/185	37/11755	0.0201332	0.681523	0.674487	ZBTB16/PHF1/PER1	3
GO:0031625	ubiquitin protein ligase binding	9/185	258/11755	0.02091	0.681523	0.674487	PACRG/PINK1/MOAP1/GABARAPL1/GABARAPL2/GABARAP/PER1/CLU/APBB1	9
GO:0015216	purine nucleotide transmembrane transporter activity	2/185	15/11755	0.0226103	0.681523	0.674487	SLC25A42/SLC25A4	2
GO:0008081	phosphoric diester hydrolase activity	4/185	72/11755	0.0266677	0.681523	0.674487	PDE7B/PDE8B/SMPD1/PDE2A	4
GO:0005001	transmembrane receptor protein tyrosine phosphatase activity	2/185	17/11755	0.0286912	0.681523	0.674487	PTPRN2/PTPRM	2
GO:0015215	nucleotide transmembrane transporter activity	2/185	17/11755	0.0286912	0.681523	0.674487	SLC25A42/SLC25A4	2
GO:0019198	transmembrane receptor protein phosphatase activity	2/185	17/11755	0.0286912	0.681523	0.674487	PTPRN2/PTPRM	2
GO:0044389	ubiquitin-like protein ligase binding	9/185	274/11755	0.0293479	0.681523	0.674487	PACRG/PINK1/MOAP1/GABARAPL1/GABARAPL2/GABARAP/PER1/CLU/APBB1	9
GO:0030371	translation repressor activity	2/185	18/11755	0.0319489	0.702875	0.695618	CPEB3/CIRBP	2
GO:0000149	SNARE binding	4/185	81/11755	0.0387312	0.70647	0.699176	VPS11/STX12/GABARAPL2/VAMP2	4
GO:0004033	aldo-keto reductase (NADP) activity	2/185	20/11755	0.0388728	0.70647	0.699176	DHRS7/KCNAB1	2
GO:0015605	organophosphate ester transmembrane transporter activity	2/185	20/11755	0.0388728	0.70647	0.699176	SLC25A42/SLC25A4	2
GO:0050750	low-density lipoprotein particle receptor binding	2/185	20/11755	0.0388728	0.70647	0.699176	CLU/APBB1	2
GO:0051787	misfolded protein binding	2/185	22/11755	0.0463079	0.80653	0.798202	DNAJB9/CLU	2
GO:0051087	chaperone binding	4/185	87/11755	0.0482501	0.806742	0.798413	PACRG/DNAJB9/CLU/SCARB2	4
GO:0016776	phosphotransferase activity, phosphate group as acceptor	2/185	25/11755	0.058336	0.903127	0.893802	NME5/DLG2	2
GO:0070325	lipoprotein particle receptor binding	2/185	25/11755	0.058336	0.903127	0.893802	CLU/APBB1	2
GO:0140323	solute:anion antiporter activity	2/185	26/11755	0.0625606	0.93394	0.924298	SLC4A4/SLC25A4	2
GO:0030674	protein-macromolecule adaptor activity	8/185	283/11755	0.0787275	0.959241	0.949337	APH1B/SERINC1/VPS11/STX12/SYNE1/MAGI2/SORBS2/VAMP2	8
GO:0005484	SNAP receptor activity	2/185	32/11755	0.0898754	0.959241	0.949337	STX12/VAMP2	2
GO:0015932	nucleobase-containing compound transmembrane transporter activity	2/185	35/11755	0.104623	0.959241	0.949337	SLC25A42/SLC25A4	2
GO:0016504	peptidase activator activity	2/185	39/11755	0.125204	0.959241	0.949337	APH1B/PINK1	2
GO:0001540	amyloid-beta binding	3/185	79/11755	0.128104	0.959241	0.949337	ITM2B/CLU/APBB1	3
GO:0003730	mRNA 3'-UTR binding	3/185	80/11755	0.131644	0.959241	0.949337	CPEB3/SECISBP2L/CIRBP	3
GO:0030544	Hsp70 protein binding	2/185	42/11755	0.141216	0.959241	0.949337	PACRG/DNAJB9	2
GO:1901505	carbohydrate derivative transmembrane transporter activity	2/185	42/11755	0.141216	0.959241	0.949337	SLC25A42/SLC25A4	2
GO:0004842	ubiquitin-protein transferase activity	7/185	274/11755	0.141642	0.959241	0.949337	RNF146/AKTIP/VPS11/SERGEF/FBXL5/PJA2/TRIM23	7
GO:0000900	mRNA regulatory element binding translation repressor activity	1/185	10/11755	0.146741	0.959241	0.949337	CPEB3	1
GO:0003995	acyl-CoA dehydrogenase activity	1/185	10/11755	0.146741	0.959241	0.949337	IVD	1
GO:0004550	nucleoside diphosphate kinase activity	1/185	10/11755	0.146741	0.959241	0.949337	NME5	1
GO:0032050	clathrin heavy chain binding	1/185	10/11755	0.146741	0.959241	0.949337	LMBRD1	1
GO:0052890	oxidoreductase activity, acting on the CH-CH group of donors, with a flavin as acceptor	1/185	10/11755	0.146741	0.959241	0.949337	IVD	1
GO:0061133	endopeptidase activator activity	1/185	10/11755	0.146741	0.959241	0.949337	APH1B	1
GO:0070016	armadillo repeat domain binding	1/185	10/11755	0.146741	0.959241	0.949337	CALCOCO1	1
GO:0098505	G-rich strand telomeric DNA binding	1/185	10/11755	0.146741	0.959241	0.949337	TERF2IP	1
GO:0004712	protein serine/threonine/tyrosine kinase activity	2/185	44/11755	0.152122	0.959241	0.949337	RPS6KA2/MAPK10	2
GO:0009881	photoreceptor activity	1/185	11/11755	0.160181	0.959241	0.949337	CRY2	1
GO:0022840	leak channel activity	1/185	11/11755	0.160181	0.959241	0.949337	KCNK3	1
GO:0022842	narrow pore channel activity	1/185	11/11755	0.160181	0.959241	0.949337	KCNK3	1
GO:0043422	protein kinase B binding	1/185	11/11755	0.160181	0.959241	0.949337	PINK1	1
GO:0050145	nucleoside monophosphate kinase activity	1/185	11/11755	0.160181	0.959241	0.949337	DLG2	1
GO:0008559	ABC-type xenobiotic transporter activity	1/185	12/11755	0.173411	0.959241	0.949337	ABCA8	1
GO:0016004	phospholipase activator activity	1/185	12/11755	0.173411	0.959241	0.949337	ARHGAP6	1
GO:0017110	nucleoside diphosphate phosphatase activity	1/185	12/11755	0.173411	0.959241	0.949337	SLC25A42	1
GO:0043047	single-stranded telomeric DNA binding	1/185	12/11755	0.173411	0.959241	0.949337	TERF2IP	1
GO:0140333	glycerophospholipid flippase activity	1/185	12/11755	0.173411	0.959241	0.949337	ATP8A1	1
GO:0060090	molecular adaptor activity	9/185	399/11755	0.17797	0.959241	0.949337	APH1B/SERINC1/VPS11/STX12/ISCU/SYNE1/MAGI2/SORBS2/VAMP2	9
GO:0019787	ubiquitin-like protein transferase activity	7/185	293/11755	0.179613	0.959241	0.949337	RNF146/AKTIP/VPS11/SERGEF/FBXL5/PJA2/TRIM23	7
GO:0019904	protein domain specific binding	12/185	567/11755	0.183051	0.959241	0.949337	DIXDC1/NDFIP1/TCEAL4/PINK1/CALCOCO1/VPS11/TCEAL1/LDB2/KCNAB1/ZBTB16/PDE2A/ARHGAP6	12
GO:0016616	oxidoreductase activity, acting on the CH-OH group of donors, NAD or NADP as acceptor	3/185	94/11755	0.184411	0.959241	0.949337	DHRS7/CRYL1/KCNAB1	3
GO:0004129	cytochrome-c oxidase activity	1/185	13/11755	0.186433	0.959241	0.949337	COX7A1	1
GO:0030553	cGMP binding	1/185	13/11755	0.186433	0.959241	0.949337	PDE2A	1
GO:0031435	mitogen-activated protein kinase kinase kinase binding	1/185	13/11755	0.186433	0.959241	0.949337	DIXDC1	1
GO:0032036	myosin heavy chain binding	1/185	13/11755	0.186433	0.959241	0.949337	LIMCH1	1
GO:0034236	protein kinase A catalytic subunit binding	1/185	13/11755	0.186433	0.959241	0.949337	PJA2	1
GO:0045125	bioactive lipid receptor activity	1/185	13/11755	0.186433	0.959241	0.949337	S1PR1	1
GO:0060229	lipase activator activity	1/185	13/11755	0.186433	0.959241	0.949337	ARHGAP6	1
GO:0001221	transcription coregulator binding	3/185	95/11755	0.188378	0.959241	0.949337	ZBTB16/PHF1/PER1	3
GO:0019905	syntaxin binding	2/185	52/11755	0.197136	0.959241	0.949337	VPS11/VAMP2	2
GO:0003756	protein disulfide isomerase activity	1/185	14/11755	0.199251	0.959241	0.949337	CRELD1	1
GO:0005521	lamin binding	1/185	14/11755	0.199251	0.959241	0.949337	SYNE1	1
GO:0016675	oxidoreductase activity, acting on a heme group of donors	1/185	14/11755	0.199251	0.959241	0.949337	COX7A1	1
GO:0016864	intramolecular oxidoreductase activity, transposing S-S bonds	1/185	14/11755	0.199251	0.959241	0.949337	CRELD1	1
GO:0031681	G-protein beta-subunit binding	1/185	14/11755	0.199251	0.959241	0.949337	GNG7	1
GO:0044548	S100 protein binding	1/185	14/11755	0.199251	0.959241	0.949337	KCNK3	1
GO:0098847	sequence-specific single stranded DNA binding	1/185	14/11755	0.199251	0.959241	0.949337	TERF2IP	1
GO:0140328	floppase activity	1/185	14/11755	0.199251	0.959241	0.949337	ATP8A1	1
GO:0004707	MAP kinase activity	1/185	15/11755	0.211868	0.959241	0.949337	MAPK10	1
GO:0005452	solute:inorganic anion antiporter activity	1/185	15/11755	0.211868	0.959241	0.949337	SLC4A4	1
GO:0008106	alcohol dehydrogenase (NADP+) activity	1/185	15/11755	0.211868	0.959241	0.949337	DHRS7	1
GO:0015645	fatty acid ligase activity	1/185	15/11755	0.211868	0.959241	0.949337	ACSM5	1
GO:0016408	C-acyltransferase activity	1/185	15/11755	0.211868	0.959241	0.949337	ACSM5	1
GO:0017075	syntaxin-1 binding	1/185	15/11755	0.211868	0.959241	0.949337	VAMP2	1
GO:0032183	SUMO binding	1/185	15/11755	0.211868	0.959241	0.949337	HABP4	1
GO:0047555	3',5'-cyclic-GMP phosphodiesterase activity	1/185	15/11755	0.211868	0.959241	0.949337	PDE2A	1
GO:0051537	2 iron, 2 sulfur cluster binding	1/185	15/11755	0.211868	0.959241	0.949337	ISCU	1
GO:0070402	NADPH binding	1/185	15/11755	0.211868	0.959241	0.949337	KCNAB1	1
GO:0070403	NAD+ binding	1/185	15/11755	0.211868	0.959241	0.949337	CRYL1	1
GO:0140327	flippase activity	1/185	15/11755	0.211868	0.959241	0.949337	ATP8A1	1
GO:0016614	oxidoreductase activity, acting on CH-OH group of donors	3/185	102/11755	0.216717	0.959241	0.949337	DHRS7/CRYL1/KCNAB1	3
GO:0044325	transmembrane transporter binding	3/185	103/11755	0.220839	0.959241	0.949337	KCNAB1/SCN1B/FHL1	3
GO:0000062	fatty-acyl-CoA binding	1/185	16/11755	0.224288	0.959241	0.949337	ACBD4	1
GO:0015106	bicarbonate transmembrane transporter activity	1/185	16/11755	0.224288	0.959241	0.949337	SLC4A4	1
GO:0035613	RNA stem-loop binding	1/185	16/11755	0.224288	0.959241	0.949337	CPEB3	1
GO:0070064	proline-rich region binding	1/185	16/11755	0.224288	0.959241	0.949337	APBB1	1
GO:1901567	fatty acid derivative binding	1/185	16/11755	0.224288	0.959241	0.949337	ACBD4	1
GO:0004708	MAP kinase kinase activity	1/185	17/11755	0.236513	0.959241	0.949337	MAPK10	1
GO:0015271	outward rectifier potassium channel activity	1/185	17/11755	0.236513	0.959241	0.949337	KCNK3	1
GO:0030552	cAMP binding	1/185	17/11755	0.236513	0.959241	0.949337	PDE2A	1
GO:0005537	mannose binding	1/185	18/11755	0.248546	0.959241	0.949337	CLN5	1
GO:0016405	CoA-ligase activity	1/185	18/11755	0.248546	0.959241	0.949337	ACSM5	1
GO:0031690	adrenergic receptor binding	1/185	18/11755	0.248546	0.959241	0.949337	MAGI2	1
GO:0120227	acyl-CoA binding	1/185	18/11755	0.248546	0.959241	0.949337	ACBD4	1
GO:0008198	ferrous iron binding	1/185	19/11755	0.26039	0.959241	0.949337	ISCU	1
GO:0140597	protein carrier chaperone	1/185	19/11755	0.26039	0.959241	0.949337	CLU	1
GO:0140678	molecular function inhibitor activity	2/185	63/11755	0.261054	0.959241	0.949337	KCNAB1/SCN1B	2
GO:0008022	protein C-terminus binding	4/185	165/11755	0.261937	0.959241	0.949337	CALCOCO1/MPDZ/ZBTB16/KCNK3	4
GO:0001664	G protein-coupled receptor binding	5/185	221/11755	0.268662	0.959241	0.949337	PACRG/MAGI2/EDNRB/S1PR1/BBS1	5
GO:0005248	voltage-gated sodium channel activity	1/185	20/11755	0.272049	0.959241	0.949337	SCN1B	1
GO:0008093	cytoskeletal anchor activity	1/185	20/11755	0.272049	0.959241	0.949337	SORBS2	1
GO:0008200	ion channel inhibitor activity	1/185	20/11755	0.272049	0.959241	0.949337	SCN1B	1
GO:0070696	transmembrane receptor protein serine/threonine kinase binding	1/185	20/11755	0.272049	0.959241	0.949337	MAGI2	1
GO:0008134	transcription factor binding	10/185	508/11755	0.278885	0.959241	0.949337	PBXIP1/GABARAPL1/WBP2/ZBTB16/PHF1/PER1/CRY2/BBS1/APBB1/ADD1	10
GO:0003707	nuclear steroid receptor activity	1/185	21/11755	0.283525	0.959241	0.949337	NR3C2	1
GO:0004181	metallocarboxypeptidase activity	1/185	21/11755	0.283525	0.959241	0.949337	CPE	1
GO:0005158	insulin receptor binding	1/185	21/11755	0.283525	0.959241	0.949337	LMBRD1	1
GO:0010857	calcium-dependent protein kinase activity	1/185	21/11755	0.283525	0.959241	0.949337	PINK1	1
GO:0015101	organic cation transmembrane transporter activity	1/185	21/11755	0.283525	0.959241	0.949337	SLC25A42	1
GO:0016248	channel inhibitor activity	1/185	21/11755	0.283525	0.959241	0.949337	SCN1B	1
GO:0016878	acid-thiol ligase activity	1/185	21/11755	0.283525	0.959241	0.949337	ACSM5	1
GO:0034237	protein kinase A regulatory subunit binding	1/185	21/11755	0.283525	0.959241	0.949337	PJA2	1
GO:0035035	histone acetyltransferase binding	1/185	21/11755	0.283525	0.959241	0.949337	EID1	1
GO:0043274	phospholipase binding	1/185	21/11755	0.283525	0.959241	0.949337	ARHGAP6	1
GO:0042578	phosphoric ester hydrolase activity	6/185	282/11755	0.28456	0.959241	0.949337	PDE7B/PDE8B/SMPD1/PTPRN2/PTPRM/PDE2A	6
GO:0000287	magnesium ion binding	4/185	173/11755	0.289929	0.962775	0.952835	PINK1/ATP8A1/RPS6KA2/PDE2A	4
GO:0004683	calmodulin-dependent protein kinase activity	1/185	22/11755	0.294821	0.962775	0.952835	CAMK1	1
GO:0035925	mRNA 3'-UTR AU-rich region binding	1/185	22/11755	0.294821	0.962775	0.952835	CPEB3	1
GO:0046625	sphingolipid binding	1/185	22/11755	0.294821	0.962775	0.952835	S1PR1	1
GO:0015297	antiporter activity	2/185	70/11755	0.301961	0.973954	0.963898	SLC4A4/SLC25A4	2
GO:0003779	actin binding	7/185	347/11755	0.305853	0.973954	0.963898	PACRG/DIXDC1/SYNE1/LIMCH1/FAM107A/TNS1/ADD1	7
GO:0030507	spectrin binding	1/185	23/11755	0.30594	0.973954	0.963898	ADD1	1
GO:0005249	voltage-gated potassium channel activity	2/185	71/11755	0.307783	0.973954	0.963898	KCNAB1/KCNK3	2
GO:0004629	phospholipase C activity	1/185	24/11755	0.316884	0.973954	0.963898	SMPD1	1
GO:0043495	protein-membrane adaptor activity	1/185	24/11755	0.316884	0.973954	0.963898	SYNE1	1
GO:0140318	protein transporter activity	1/185	24/11755	0.316884	0.973954	0.963898	LMBRD1	1
GO:0140326	ATPase-coupled intramembrane lipid transporter activity	1/185	24/11755	0.316884	0.973954	0.963898	ATP8A1	1
GO:0031210	phosphatidylcholine binding	1/185	25/11755	0.327657	0.985329	0.975156	SCARB2	1
GO:0033612	receptor serine/threonine kinase binding	1/185	25/11755	0.327657	0.985329	0.975156	MAGI2	1
GO:0043015	gamma-tubulin binding	1/185	25/11755	0.327657	0.985329	0.975156	DIXDC1	1
GO:0015399	primary active transmembrane transporter activity	3/185	129/11755	0.331576	0.989991	0.979769	ATP8A1/ABCA8/COX7A1	3
GO:0042910	xenobiotic transmembrane transporter activity	1/185	26/11755	0.338261	0.995727	0.985446	ABCA8	1
GO:0061631	ubiquitin conjugating enzyme activity	1/185	26/11755	0.338261	0.995727	0.985446	AKTIP	1
GO:0050660	flavin adenine dinucleotide binding	2/185	77/11755	0.342478	1	0.989675	IVD/CRY2	2
GO:0004725	protein tyrosine phosphatase activity	2/185	78/11755	0.348212	1	0.989675	PTPRN2/PTPRM	2
GO:0008324	cation transmembrane transporter activity	9/185	485/11755	0.354796	1	0.989675	SLC25A42/ATP8A1/SLC4A4/KCNAB1/SCN1B/KCNK3/GPM6A/COX7A1/SLC25A4	9
GO:0017080	sodium channel regulator activity	1/185	28/11755	0.358973	1	0.989675	SCN1B	1
GO:0042393	histone binding	4/185	195/11755	0.368416	1	0.989675	TSPYL1/PHF1/NAP1L2/APBB1	4
GO:0043014	alpha-tubulin binding	1/185	29/11755	0.369085	1	0.989675	PACRG	1
GO:0061650	ubiquitin-like protein conjugating enzyme activity	1/185	29/11755	0.369085	1	0.989675	AKTIP	1
GO:0042626	ATPase-coupled transmembrane transporter activity	2/185	82/11755	0.370972	1	0.989675	ATP8A1/ABCA8	2
GO:0008514	organic anion transmembrane transporter activity	3/185	139/11755	0.374624	1	0.989675	SLC25A42/SLC4A4/SLC25A4	3
GO:0030551	cyclic nucleotide binding	1/185	30/11755	0.379039	1	0.989675	PDE2A	1
GO:0016877	ligase activity, forming carbon-sulfur bonds	1/185	31/11755	0.388837	1	0.989675	ACSM5	1
GO:0140303	intramembrane lipid transporter activity	1/185	31/11755	0.388837	1	0.989675	ATP8A1	1
GO:0005244	voltage-gated ion channel activity	3/185	143/11755	0.391715	1	0.989675	KCNAB1/SCN1B/KCNK3	3
GO:0022832	voltage-gated channel activity	3/185	143/11755	0.391715	1	0.989675	KCNAB1/SCN1B/KCNK3	3
GO:0030331	nuclear estrogen receptor binding	1/185	32/11755	0.398481	1	0.989675	WBP2	1
GO:0005267	potassium channel activity	2/185	88/11755	0.4045	1	0.989675	KCNAB1/KCNK3	2
GO:0050997	quaternary ammonium group binding	1/185	33/11755	0.407973	1	0.989675	SCARB2	1
GO:0005496	steroid binding	2/185	89/11755	0.410007	1	0.989675	NR3C2/SCARB2	2
GO:0004180	carboxypeptidase activity	1/185	34/11755	0.417317	1	0.989675	CPE	1
GO:0005044	scavenger receptor activity	1/185	34/11755	0.417317	1	0.989675	SCARB2	1
GO:0042162	telomeric DNA binding	1/185	34/11755	0.417317	1	0.989675	TERF2IP	1
GO:0022890	inorganic cation transmembrane transporter activity	8/185	452/11755	0.418607	1	0.989675	ATP8A1/SLC4A4/KCNAB1/SCN1B/KCNK3/GPM6A/COX7A1/SLC25A4	8
GO:0008374	O-acyltransferase activity	1/185	36/11755	0.435566	1	0.989675	CASD1	1
GO:0071949	FAD binding	1/185	36/11755	0.435566	1	0.989675	CRY2	1
GO:0015078	proton transmembrane transporter activity	2/185	94/11755	0.437159	1	0.989675	COX7A1/SLC25A4	2
GO:0022853	active ion transmembrane transporter activity	4/185	216/11755	0.442986	1	0.989675	ATP8A1/SLC4A4/COX7A1/SLC25A4	4
GO:0005272	sodium channel activity	1/185	37/11755	0.444476	1	0.989675	SCN1B	1
GO:0015631	tubulin binding	5/185	278/11755	0.445448	1	0.989675	PACRG/DIXDC1/GABARAPL1/GABARAPL2/GABARAP	5
GO:0016798	hydrolase activity, acting on glycosyl bonds	2/185	97/11755	0.453126	1	0.989675	SMPD1/CLN5	2
GO:0051879	Hsp90 protein binding	1/185	38/11755	0.453247	1	0.989675	PACRG	1
GO:0019902	phosphatase binding	3/185	158/11755	0.454563	1	0.989675	TERF2IP/MAGI2/CRY2	3
GO:0015459	potassium channel regulator activity	1/185	39/11755	0.461879	1	0.989675	KCNAB1	1
GO:0140297	DNA-binding transcription factor binding	7/185	409/11755	0.465237	1	0.989675	PBXIP1/GABARAPL1/WBP2/PER1/CRY2/BBS1/ADD1	7
GO:0008307	structural constituent of muscle	1/185	40/11755	0.470377	1	0.989675	SORBS2	1
GO:0099106	ion channel regulator activity	2/185	101/11755	0.474009	1	0.989675	KCNAB1/SCN1B	2
GO:0016860	intramolecular oxidoreductase activity	1/185	41/11755	0.47874	1	0.989675	CRELD1	1
GO:0048156	tau protein binding	1/185	41/11755	0.47874	1	0.989675	CLU	1
GO:0070888	E-box binding	1/185	41/11755	0.47874	1	0.989675	PER1	1
GO:0140359	ABC-type transporter activity	1/185	41/11755	0.47874	1	0.989675	ABCA8	1
GO:0031490	chromatin DNA binding	2/185	102/11755	0.479154	1	0.989675	WBP2/PER1	2
GO:0051018	protein kinase A binding	1/185	42/11755	0.486973	1	0.989675	PJA2	1
GO:0003713	transcription coactivator activity	4/185	230/11755	0.491285	1	0.989675	CALCOCO1/PBXIP1/WBP2/APBB1	4
GO:0045182	translation regulator activity	2/185	105/11755	0.494407	1	0.989675	CPEB3/CIRBP	2
GO:0005516	calmodulin binding	3/185	169/11755	0.498916	1	0.989675	CAMK1/VAMP2/ADD1	3
GO:0016247	channel regulator activity	2/185	106/11755	0.499428	1	0.989675	KCNAB1/SCN1B	2
GO:0001786	phosphatidylserine binding	1/185	44/11755	0.503051	1	0.989675	SCARB2	1
GO:0015485	cholesterol binding	1/185	44/11755	0.503051	1	0.989675	SCARB2	1
GO:0003697	single-stranded DNA binding	2/185	107/11755	0.504418	1	0.989675	TERF2IP/CRY2	2
GO:0022843	voltage-gated cation channel activity	2/185	107/11755	0.504418	1	0.989675	KCNAB1/KCNK3	2
GO:0031072	heat shock protein binding	2/185	108/11755	0.509375	1	0.989675	PACRG/DNAJB9	2
GO:0019829	ATPase-coupled cation transmembrane transporter activity	1/185	45/11755	0.510902	1	0.989675	ATP8A1	1
GO:0005548	phospholipid transporter activity	1/185	46/11755	0.518629	1	0.989675	ATP8A1	1
GO:0030159	signaling receptor complex adaptor activity	1/185	46/11755	0.518629	1	0.989675	MAGI2	1
GO:0030374	nuclear receptor coactivator activity	1/185	46/11755	0.518629	1	0.989675	CALCOCO1	1
GO:0015453	oxidoreduction-driven active transmembrane transporter activity	1/185	47/11755	0.526234	1	0.989675	COX7A1	1
GO:0044183	protein folding chaperone	1/185	47/11755	0.526234	1	0.989675	RIC3	1
GO:0005507	copper ion binding	1/185	48/11755	0.53372	1	0.989675	F8	1
GO:0016782	transferase activity, transferring sulphur-containing groups	1/185	48/11755	0.53372	1	0.989675	MOCS2	1
GO:0016811	hydrolase activity, acting on carbon-nitrogen (but not peptide) bonds, in linear amides	1/185	49/11755	0.541089	1	0.989675	BTD	1
GO:0050661	NADP binding	1/185	49/11755	0.541089	1	0.989675	KCNAB1	1
GO:0022804	active transmembrane transporter activity	5/185	310/11755	0.541327	1	0.989675	ATP8A1/ABCA8/SLC4A4/COX7A1/SLC25A4	5
GO:0061629	RNA polymerase II-specific DNA-binding transcription factor binding	5/185	310/11755	0.541327	1	0.989675	GABARAPL1/WBP2/CRY2/BBS1/ADD1	5
GO:0004879	nuclear receptor activity	1/185	50/11755	0.548341	1	0.989675	NR3C2	1
GO:0051287	NAD binding	1/185	50/11755	0.548341	1	0.989675	CRYL1	1
GO:0098531	ligand-activated transcription factor activity	1/185	50/11755	0.548341	1	0.989675	NR3C2	1
GO:0015079	potassium ion transmembrane transporter activity	2/185	117/11755	0.552517	1	0.989675	KCNAB1/KCNK3	2
GO:0016627	oxidoreductase activity, acting on the CH-CH group of donors	1/185	51/11755	0.55548	1	0.989675	IVD	1
GO:0017046	peptide hormone binding	1/185	51/11755	0.55548	1	0.989675	EDNRB	1
GO:0005319	lipid transporter activity	2/185	118/11755	0.557143	1	0.989675	ATP8A1/ABCA8	2
GO:0030276	clathrin binding	1/185	52/11755	0.562506	1	0.989675	LMBRD1	1
GO:0043022	ribosome binding	1/185	52/11755	0.562506	1	0.989675	CPEB3	1
GO:0005506	iron ion binding	2/185	120/11755	0.566295	1	0.989675	FBXL5/ISCU	2
GO:0008235	metalloexopeptidase activity	1/185	53/11755	0.569422	1	0.989675	CPE	1
GO:0019843	rRNA binding	1/185	53/11755	0.569422	1	0.989675	CIRBP	1
GO:0032934	sterol binding	1/185	53/11755	0.569422	1	0.989675	SCARB2	1
GO:0008234	cysteine-type peptidase activity	2/185	121/11755	0.57082	1	0.989675	UFSP2/CTSO	2
GO:0043021	ribonucleoprotein complex binding	2/185	122/11755	0.57531	1	0.989675	CPEB3/SECISBP2L	2
GO:0005261	cation channel activity	4/185	257/11755	0.579024	1	0.989675	KCNAB1/SCN1B/KCNK3/GPM6A	4
GO:0015081	sodium ion transmembrane transporter activity	2/185	123/11755	0.579767	1	0.989675	SLC4A4/SCN1B	2
GO:0051536	iron-sulfur cluster binding	1/185	55/11755	0.582929	1	0.989675	ISCU	1
GO:0051540	metal cluster binding	1/185	55/11755	0.582929	1	0.989675	ISCU	1
GO:0043621	protein self-association	1/185	57/11755	0.596015	1	0.989675	VAMP2	1
GO:0046873	metal ion transmembrane transporter activity	5/185	331/11755	0.599923	1	0.989675	SLC4A4/KCNAB1/SCN1B/KCNK3/GPM6A	5
GO:0016922	nuclear receptor binding	2/185	128/11755	0.601537	1	0.989675	WBP2/CRY2	2
GO:0061630	ubiquitin protein ligase activity	3/185	197/11755	0.602809	1	0.989675	RNF146/VPS11/SERGEF	3
GO:0019003	GDP binding	1/185	59/11755	0.608692	1	0.989675	TRIM23	1
GO:0035064	methylated histone binding	1/185	60/11755	0.614882	1	0.989675	PHF1	1
GO:0140034	methylation-dependent protein binding	1/185	60/11755	0.614882	1	0.989675	PHF1	1
GO:0003712	transcription coregulator activity	6/185	404/11755	0.615179	1	0.989675	CALCOCO1/PBXIP1/EID1/WBP2/LDB2/APBB1	6
GO:0033218	amide binding	5/185	341/11755	0.626318	1	0.989675	ACBD4/ITM2B/EDNRB/CLU/APBB1	5
GO:0004721	phosphoprotein phosphatase activity	2/185	135/11755	0.630579	1	0.989675	PTPRN2/PTPRM	2
GO:0015318	inorganic molecular entity transmembrane transporter activity	8/185	546/11755	0.632766	1	0.989675	ATP8A1/SLC4A4/KCNAB1/SCN1B/KCNK3/GPM6A/COX7A1/SLC25A4	8
GO:0015370	solute:sodium symporter activity	1/185	63/11755	0.632872	1	0.989675	SLC4A4	1
GO:0017022	myosin binding	1/185	63/11755	0.632872	1	0.989675	LIMCH1	1
GO:0019888	protein phosphatase regulator activity	1/185	63/11755	0.632872	1	0.989675	RCAN2	1
GO:0048029	monosaccharide binding	1/185	63/11755	0.632872	1	0.989675	CLN5	1
GO:0061659	ubiquitin-like protein ligase activity	3/185	207/11755	0.636327	1	0.989675	RNF146/VPS11/SERGEF	3
GO:0008135	translation factor activity, RNA binding	1/185	64/11755	0.638681	1	0.989675	CPEB3	1
GO:0003682	chromatin binding	7/185	482/11755	0.639612	1	0.989675	CALCOCO1/WBP2/TSPYL1/PHF1/PER1/NAP1L2/APBB1	7
GO:0003684	damaged DNA binding	1/185	65/11755	0.644398	1	0.989675	CRY2	1
GO:0030971	receptor tyrosine kinase binding	1/185	65/11755	0.644398	1	0.989675	SHC2	1
GO:0140104	molecular carrier activity	1/185	65/11755	0.644398	1	0.989675	CLU	1
GO:0042277	peptide binding	4/185	281/11755	0.649359	1	0.989675	ITM2B/EDNRB/CLU/APBB1	4
GO:0038024	cargo receptor activity	1/185	66/11755	0.650026	1	0.989675	SCARB2	1
GO:0015075	ion transmembrane transporter activity	9/185	626/11755	0.657859	1	0.989675	SLC25A42/ATP8A1/SLC4A4/KCNAB1/SCN1B/KCNK3/GPM6A/COX7A1/SLC25A4	9
GO:0035591	signaling adaptor activity	1/185	68/11755	0.661017	1	0.989675	MAGI2	1
GO:0048306	calcium-dependent protein binding	1/185	68/11755	0.661017	1	0.989675	VAMP2	1
GO:0016407	acetyltransferase activity	1/185	69/11755	0.666383	1	0.989675	CASD1	1
GO:0001618	virus receptor activity	1/185	70/11755	0.671664	1	0.989675	SCARB2	1
GO:0106310	protein serine kinase activity	4/185	290/11755	0.673653	1	0.989675	PINK1/CAMK1/RPS6KA2/MAPK10	4
GO:0046332	SMAD binding	1/185	71/11755	0.676862	1	0.989675	MAGI2	1
GO:0140272	exogenous protein binding	1/185	71/11755	0.676862	1	0.989675	SCARB2	1
GO:0003714	transcription corepressor activity	2/185	148/11755	0.680117	1	0.989675	PBXIP1/EID1	2
GO:0072341	modified amino acid binding	1/185	72/11755	0.681979	1	0.989675	SCARB2	1
GO:0016747	acyltransferase activity, transferring groups other than amino-acyl groups	2/185	149/11755	0.683695	1	0.989675	CASD1/ACSM5	2
GO:0051117	ATPase binding	1/185	74/11755	0.691971	1	0.989675	GABARAPL2	1
GO:0004620	phospholipase activity	1/185	75/11755	0.69685	1	0.989675	SMPD1	1
GO:0008013	beta-catenin binding	1/185	75/11755	0.69685	1	0.989675	CALCOCO1	1
GO:0022857	transmembrane transporter activity	11/185	784/11755	0.697067	1	0.989675	SLC25A42/SLC22A17/ATP8A1/ABCA8/SLC4A4/KCNAB1/SCN1B/KCNK3/GPM6A/COX7A1/SLC25A4	11
GO:0008092	cytoskeletal protein binding	11/185	786/11755	0.700257	1	0.989675	PACRG/DIXDC1/GABARAPL1/SYNE1/LIMCH1/GABARAPL2/GABARAP/FAM107A/TNS1/CLU/ADD1	11
GO:0008509	anion transmembrane transporter activity	3/185	229/11755	0.702984	1	0.989675	SLC25A42/SLC4A4/SLC25A4	3
GO:0000978	RNA polymerase II cis-regulatory region sequence-specific DNA binding	11/185	788/11755	0.703427	1	0.989675	ZFP2/CALCOCO1/KLF15/WBP2/ZBTB16/TEF/POU6F1/PER1/NR3C2/HLF/KLF9	11
GO:0016301	kinase activity	8/185	583/11755	0.704394	1	0.989675	PINK1/CAMK1/NME5/TK2/RPS6KA2/MAPK10/PDK4/DLG2	8
GO:0019783	ubiquitin-like protein peptidase activity	1/185	77/11755	0.706377	1	0.989675	UFSP2	1
GO:0043178	alcohol binding	1/185	77/11755	0.706377	1	0.989675	SCARB2	1
GO:0019208	phosphatase regulator activity	1/185	78/11755	0.711029	1	0.989675	RCAN2	1
GO:0090079	translation regulator activity, nucleic acid binding	1/185	78/11755	0.711029	1	0.989675	CPEB3	1
GO:0005215	transporter activity	12/185	866/11755	0.718521	1	0.989675	SLC25A42/LMBRD1/SLC22A17/ATP8A1/ABCA8/SLC4A4/KCNAB1/SCN1B/KCNK3/GPM6A/COX7A1/SLC25A4	12
GO:0004197	cysteine-type endopeptidase activity	1/185	80/11755	0.720113	1	0.989675	CTSO	1
GO:0008238	exopeptidase activity	1/185	80/11755	0.720113	1	0.989675	CPE	1
GO:0000987	cis-regulatory region sequence-specific DNA binding	11/185	803/11755	0.726548	1	0.989675	ZFP2/CALCOCO1/KLF15/WBP2/ZBTB16/TEF/POU6F1/PER1/NR3C2/HLF/KLF9	11
GO:0051219	phosphoprotein binding	1/185	82/11755	0.728913	1	0.989675	BBS1	1
GO:0016746	acyltransferase activity	2/185	164/11755	0.733534	1	0.989675	CASD1/ACSM5	2
GO:0042562	hormone binding	1/185	84/11755	0.737438	1	0.989675	EDNRB	1
GO:0015294	solute:cation symporter activity	1/185	85/11755	0.7416	1	0.989675	SLC4A4	1
GO:0016298	lipase activity	1/185	86/11755	0.745696	1	0.989675	SMPD1	1
GO:0004896	cytokine receptor activity	1/185	88/11755	0.753696	1	0.989675	LIFR	1
GO:0016788	hydrolase activity, acting on ester bonds	7/185	541/11755	0.753726	1	0.989675	PDE7B/RGN/PDE8B/SMPD1/PTPRN2/PTPRM/PDE2A	7
GO:0005216	ion channel activity	4/185	324/11755	0.754792	1	0.989675	KCNAB1/SCN1B/KCNK3/GPM6A	4
GO:0061134	peptidase regulator activity	2/185	172/11755	0.757295	1	0.989675	APH1B/PINK1	2
GO:0003729	mRNA binding	3/185	250/11755	0.757591	1	0.989675	CPEB3/SECISBP2L/CIRBP	3
GO:0005262	calcium channel activity	1/185	89/11755	0.757602	1	0.989675	GPM6A	1
GO:0051015	actin filament binding	2/185	174/11755	0.762943	1	0.989675	SYNE1/ADD1	2
GO:0022836	gated channel activity	3/185	254/11755	0.767026	1	0.989675	KCNAB1/SCN1B/KCNK3	3
GO:0016810	hydrolase activity, acting on carbon-nitrogen (but not peptide) bonds	1/185	94/11755	0.776225	1	0.989675	BTD	1
GO:0032182	ubiquitin-like protein binding	1/185	94/11755	0.776225	1	0.989675	HABP4	1
GO:0015291	secondary active transmembrane transporter activity	2/185	180/11755	0.779213	1	0.989675	SLC4A4/SLC25A4	2
GO:0009055	electron transfer activity	1/185	96/11755	0.783269	1	0.989675	COX7A1	1
GO:0051082	unfolded protein binding	1/185	96/11755	0.783269	1	0.989675	CLU	1
GO:0016491	oxidoreductase activity	7/185	561/11755	0.785989	1	0.989675	DHRS12/DHRS7/CRYL1/KCNAB1/IVD/F8/COX7A1	7
GO:0052689	carboxylic ester hydrolase activity	1/185	97/11755	0.786708	1	0.989675	RGN	1
GO:0004674	protein serine/threonine kinase activity	4/185	341/11755	0.789147	1	0.989675	PINK1/CAMK1/RPS6KA2/MAPK10	4
GO:0017124	SH3 domain binding	1/185	98/11755	0.790093	1	0.989675	ARHGAP6	1
GO:0005200	structural constituent of cytoskeleton	1/185	99/11755	0.793424	1	0.989675	SORBS2	1
GO:1990782	protein tyrosine kinase binding	1/185	102/11755	0.803106	1	0.989675	SHC2	1
GO:0015293	symporter activity	1/185	103/11755	0.806231	1	0.989675	SLC4A4	1
GO:0019900	kinase binding	8/185	648/11755	0.806892	1	0.989675	DIXDC1/PINK1/NBEA/SHC2/PJA2/PER1/DLG2/CRY2	8
GO:0015085	calcium ion transmembrane transporter activity	1/185	104/11755	0.809308	1	0.989675	GPM6A	1
GO:0015267	channel activity	4/185	353/11755	0.811019	1	0.989675	KCNAB1/SCN1B/KCNK3/GPM6A	4
GO:0022803	passive transmembrane transporter activity	4/185	353/11755	0.811019	1	0.989675	KCNAB1/SCN1B/KCNK3/GPM6A	4
GO:0008017	microtubule binding	2/185	200/11755	0.826604	1	0.989675	GABARAPL2/GABARAP	2
GO:0016853	isomerase activity	1/185	113/11755	0.834899	1	0.989675	CRELD1	1
GO:0019001	guanyl nucleotide binding	3/185	292/11755	0.842514	1	0.989675	ACSM5/PDE2A/TRIM23	3
GO:0032561	guanyl ribonucleotide binding	3/185	292/11755	0.842514	1	0.989675	ACSM5/PDE2A/TRIM23	3
GO:0019838	growth factor binding	1/185	116/11755	0.842646	1	0.989675	LIFR	1
GO:0046914	transition metal ion binding	10/185	825/11755	0.84472	1	0.989675	RNF146/FBXL5/ISCU/RGN/SMPD1/PDE2A/NR3C2/F8/CPE/TRIM23	10
GO:0016791	phosphatase activity	2/185	210/11755	0.84671	1	0.989675	PTPRN2/PTPRM	2
GO:0002020	protease binding	1/185	118/11755	0.847609	1	0.989675	PINK1	1
GO:0046906	tetrapyrrole binding	1/185	118/11755	0.847609	1	0.989675	LMBRD1	1
GO:0001228	DNA-binding transcription activator activity, RNA polymerase II-specific	4/185	376/11755	0.847785	1	0.989675	KLF15/ZBTB16/TEF/HLF	4
GO:0000977	RNA polymerase II transcription regulatory region sequence-specific DNA binding	11/185	903/11755	0.850341	1	0.989675	ZFP2/CALCOCO1/KLF15/WBP2/ZBTB16/TEF/POU6F1/PER1/NR3C2/HLF/KLF9	11
GO:0001216	DNA-binding transcription activator activity	4/185	379/11755	0.852109	1	0.989675	KLF15/ZBTB16/TEF/HLF	4
GO:0004672	protein kinase activity	5/185	458/11755	0.852513	1	0.989675	PINK1/CAMK1/RPS6KA2/MAPK10/PDK4	5
GO:0008270	zinc ion binding	7/185	612/11755	0.853934	1	0.989675	RNF146/RGN/SMPD1/PDE2A/NR3C2/CPE/TRIM23	7
GO:0016772	transferase activity, transferring phosphorus-containing groups	8/185	687/11755	0.854156	1	0.989675	PINK1/CAMK1/NME5/TK2/RPS6KA2/MAPK10/PDK4/DLG2	8
GO:0019842	vitamin binding	1/185	121/11755	0.854762	1	0.989675	LMBRD1	1
GO:0016874	ligase activity	1/185	122/11755	0.857072	1	0.989675	ACSM5	1
GO:0000976	transcription cis-regulatory region binding	12/185	983/11755	0.857746	1	0.989675	ZFP2/CALCOCO1/KLF15/WBP2/ZBTB16/TEF/POU6F1/PER1/NR3C2/HLF/CRY2/KLF9	12
GO:0001067	transcription regulatory region nucleic acid binding	12/185	984/11755	0.858654	1	0.989675	ZFP2/CALCOCO1/KLF15/WBP2/ZBTB16/TEF/POU6F1/PER1/NR3C2/HLF/CRY2/KLF9	12
GO:0008528	G protein-coupled peptide receptor activity	1/185	123/11755	0.859345	1	0.989675	EDNRB	1
GO:0019955	cytokine binding	1/185	124/11755	0.861582	1	0.989675	LIFR	1
GO:0001227	DNA-binding transcription repressor activity, RNA polymerase II-specific	2/185	220/11755	0.864686	1	0.989675	ZBTB16/POU6F1	2
GO:0015103	inorganic anion transmembrane transporter activity	1/185	126/11755	0.86595	1	0.989675	SLC4A4	1
GO:0140375	immune receptor activity	1/185	126/11755	0.86595	1	0.989675	LIFR	1
GO:0140030	modification-dependent protein binding	1/185	127/11755	0.868083	1	0.989675	PHF1	1
GO:0001217	DNA-binding transcription repressor activity	2/185	223/11755	0.869692	1	0.989675	ZBTB16/POU6F1	2
GO:0001653	peptide receptor activity	1/185	129/11755	0.872247	1	0.989675	EDNRB	1
GO:0000981	DNA-binding transcription factor activity, RNA polymerase II-specific	10/185	858/11755	0.876328	1	0.989675	GTF2IRD2B/ZFP2/KLF15/ZBTB16/TEF/POU6F1/NR3C2/HLF/CREBL2/KLF9	10
GO:0042803	protein homodimerization activity	6/185	562/11755	0.882543	1	0.989675	CRYL1/SYNE1/ZBTB16/PDE2A/SCARB2/ADD1	6
GO:0003700	DNA-binding transcription factor activity	10/185	878/11755	0.892837	1	0.989675	GTF2IRD2B/ZFP2/KLF15/ZBTB16/TEF/POU6F1/NR3C2/HLF/CREBL2/KLF9	10
GO:0019901	protein kinase binding	6/185	576/11755	0.895999	1	0.989675	DIXDC1/PINK1/NBEA/SHC2/PJA2/CRY2	6
GO:0005201	extracellular matrix structural constituent	1/185	142/11755	0.896304	1	0.989675	CRELD1	1
GO:0061135	endopeptidase regulator activity	1/185	142/11755	0.896304	1	0.989675	APH1B	1
GO:0008237	metallopeptidase activity	1/185	143/11755	0.897956	1	0.989675	CPE	1
GO:0008047	enzyme activator activity	4/185	419/11755	0.900511	1	0.989675	APH1B/PINK1/ARHGAP6/TRIM23	4
GO:0008168	methyltransferase activity	1/185	155/11755	0.915851	1	0.989675	METTL7A	1
GO:0005085	guanyl-nucleotide exchange factor activity	1/185	162/11755	0.92481	1	0.989675	SERGEF	1
GO:0016741	transferase activity, transferring one-carbon groups	1/185	166/11755	0.929496	1	0.989675	METTL7A	1
GO:0005525	GTP binding	2/185	274/11755	0.932511	1	0.989675	ACSM5/TRIM23	2
GO:0016773	phosphotransferase activity, alcohol group as acceptor	5/185	542/11755	0.933025	1	0.989675	PINK1/CAMK1/RPS6KA2/MAPK10/PDK4	5
GO:0004888	transmembrane signaling receptor activity	7/185	716/11755	0.939056	1	0.989675	SLC22A17/PTPRN2/PTPRM/LIFR/EDNRB/S1PR1/SCARB2	7
GO:0045296	cadherin binding	2/185	291/11755	0.946143	1	0.989675	PTPRM/ADD1	2
GO:0038023	signaling receptor activity	9/185	901/11755	0.951172	1	0.989675	SLC22A17/PTPRN2/PTPRM/NR3C2/LIFR/EDNRB/S1PR1/CRY2/SCARB2	9
GO:0060089	molecular transducer activity	9/185	901/11755	0.951172	1	0.989675	SLC22A17/PTPRN2/PTPRM/NR3C2/LIFR/EDNRB/S1PR1/CRY2/SCARB2	9
GO:0005096	GTPase activator activity	1/185	191/11755	0.952868	1	0.989675	ARHGAP6	1
GO:0030246	carbohydrate binding	1/185	192/11755	0.953623	1	0.989675	CLN5	1
GO:0008233	peptidase activity	3/185	420/11755	0.963766	1	0.989675	UFSP2/CTSO/CPE	3
GO:0140657	ATP-dependent activity	3/185	421/11755	0.964205	1	0.989675	ACSM5/ATP8A1/ABCA8	3
GO:1901681	sulfur compound binding	1/185	219/11755	0.970011	1	0.989675	ACBD4	1
GO:0008289	lipid binding	5/185	628/11755	0.972496	1	0.989675	ACBD4/VAMP2/NR3C2/S1PR1/SCARB2	5
GO:0005126	cytokine receptor binding	1/185	228/11755	0.974073	1	0.989675	LIFR	1
GO:0030695	GTPase regulator activity	2/185	346/11755	0.974498	1	0.989675	SERGEF/ARHGAP6	2
GO:0060589	nucleoside-triphosphatase regulator activity	2/185	346/11755	0.974498	1	0.989675	SERGEF/ARHGAP6	2
GO:0005543	phospholipid binding	2/185	347/11755	0.974848	1	0.989675	VAMP2/SCARB2	2
GO:0003924	GTPase activity	1/185	232/11755	0.975698	1	0.989675	TRIM23	1
GO:0046982	protein heterodimerization activity	1/185	238/11755	0.977947	1	0.989675	ADD1	1
GO:0004930	G protein-coupled receptor activity	2/185	359/11755	0.978703	1	0.989675	EDNRB/S1PR1	2
GO:0030234	enzyme regulator activity	8/185	930/11755	0.982206	1	0.989675	APH1B/PINK1/SERGEF/EID1/RCAN2/RGN/ARHGAP6/TRIM23	8
GO:0050839	cell adhesion molecule binding	3/185	488/11755	0.984518	1	0.989675	PTPRM/CPE/ADD1	3
GO:0016887	ATP hydrolysis activity	1/185	263/11755	0.985295	1	0.989675	ATP8A1	1
GO:0046983	protein dimerization activity	6/185	804/11755	0.98921	1	0.989675	CRYL1/SYNE1/ZBTB16/PDE2A/SCARB2/ADD1	6
GO:0005509	calcium ion binding	3/185	528/11755	0.990774	1	0.989675	CRELD1/EFCAB6/RGN	3
GO:0016462	pyrophosphatase activity	3/185	536/11755	0.991692	1	0.989675	SLC25A42/ATP8A1/TRIM23	3
GO:0016817	hydrolase activity, acting on acid anhydrides	3/185	537/11755	0.991801	1	0.989675	SLC25A42/ATP8A1/TRIM23	3
GO:0016818	hydrolase activity, acting on acid anhydrides, in phosphorus-containing anhydrides	3/185	537/11755	0.991801	1	0.989675	SLC25A42/ATP8A1/TRIM23	3
GO:0004175	endopeptidase activity	1/185	301/11755	0.992072	1	0.989675	CTSO	1
GO:0017111	ribonucleoside triphosphate phosphatase activity	2/185	495/11755	0.996963	1	0.989675	ATP8A1/TRIM23	2
GO:0005198	structural molecule activity	2/185	601/11755	0.999375	1	0.989675	CRELD1/SORBS2	2
GO:0003727	single-stranded RNA binding	0/185	70/11755	1	1	0.989675		0
GO:0004467	long-chain fatty acid-CoA ligase activity	0/185	13/11755	1	1	0.989675		0
GO:0004497	monooxygenase activity	0/185	83/11755	1	1	0.989675		0
GO:0004622	lysophospholipase activity	0/185	14/11755	1	1	0.989675		0
GO:0005125	cytokine activity	0/185	183/11755	1	1	0.989675		0
GO:0005164	tumor necrosis factor receptor binding	0/185	29/11755	1	1	0.989675		0
GO:0005324	long-chain fatty acid transporter activity	0/185	14/11755	1	1	0.989675		0
GO:0005342	organic acid transmembrane transporter activity	0/185	113/11755	1	1	0.989675		0
GO:0005539	glycosaminoglycan binding	0/185	191/11755	1	1	0.989675		0
GO:0008028	monocarboxylic acid transmembrane transporter activity	0/185	40/11755	1	1	0.989675		0
GO:0008083	growth factor activity	0/185	143/11755	1	1	0.989675		0
GO:0008143	poly(A) binding	0/185	20/11755	1	1	0.989675		0
GO:0008187	poly-pyrimidine tract binding	0/185	20/11755	1	1	0.989675		0
GO:0008201	heparin binding	0/185	137/11755	1	1	0.989675		0
GO:0008266	poly(U) RNA binding	0/185	17/11755	1	1	0.989675		0
GO:0008327	methyl-CpG binding	0/185	18/11755	1	1	0.989675		0
GO:0008373	sialyltransferase activity	0/185	14/11755	1	1	0.989675		0
GO:0015562	efflux transmembrane transporter activity	0/185	10/11755	1	1	0.989675		0
GO:0016409	palmitoyltransferase activity	0/185	19/11755	1	1	0.989675		0
GO:0016417	S-acyltransferase activity	0/185	15/11755	1	1	0.989675		0
GO:0016645	oxidoreductase activity, acting on the CH-NH group of donors	0/185	19/11755	1	1	0.989675		0
GO:0016705	oxidoreductase activity, acting on paired donors, with incorporation or reduction of molecular oxygen	0/185	141/11755	1	1	0.989675		0
GO:0016757	glycosyltransferase activity	0/185	178/11755	1	1	0.989675		0
GO:0016780	phosphotransferase activity, for other substituted phosphate groups	0/185	17/11755	1	1	0.989675		0
GO:0019706	protein-cysteine S-palmitoyltransferase activity	0/185	11/11755	1	1	0.989675		0
GO:0019707	protein-cysteine S-acyltransferase activity	0/185	11/11755	1	1	0.989675		0
GO:0020037	heme binding	0/185	109/11755	1	1	0.989675		0
GO:0030165	PDZ domain binding	0/185	68/11755	1	1	0.989675		0
GO:0030545	signaling receptor regulator activity	0/185	403/11755	1	1	0.989675		0
GO:0030546	signaling receptor activator activity	0/185	383/11755	1	1	0.989675		0
GO:0031267	small GTPase binding	0/185	216/11755	1	1	0.989675		0
GO:0031406	carboxylic acid binding	0/185	137/11755	1	1	0.989675		0
GO:0031624	ubiquitin conjugating enzyme binding	0/185	22/11755	1	1	0.989675		0
GO:0032813	tumor necrosis factor receptor superfamily binding	0/185	45/11755	1	1	0.989675		0
GO:0042887	amide transmembrane transporter activity	0/185	27/11755	1	1	0.989675		0
GO:0044390	ubiquitin-like protein conjugating enzyme binding	0/185	27/11755	1	1	0.989675		0
GO:0046943	carboxylic acid transmembrane transporter activity	0/185	113/11755	1	1	0.989675		0
GO:0048018	receptor ligand activity	0/185	376/11755	1	1	0.989675		0
GO:0051020	GTPase binding	0/185	244/11755	1	1	0.989675		0
GO:0051861	glycolipid binding	0/185	25/11755	1	1	0.989675		0
GO:0070717	poly-purine tract binding	0/185	24/11755	1	1	0.989675		0
GO:0071813	lipoprotein particle binding	0/185	25/11755	1	1	0.989675		0
GO:0071814	protein-lipid complex binding	0/185	25/11755	1	1	0.989675		0
GO:0090482	vitamin transmembrane transporter activity	0/185	24/11755	1	1	0.989675		0
GO:0097001	ceramide binding	0/185	14/11755	1	1	0.989675		0
GO:0140767	enzyme-substrate adaptor activity	0/185	24/11755	1	1	0.989675		0
GO:1901682	sulfur compound transmembrane transporter activity	0/185	43/11755	1	1	0.989675		0
GO:1990756	ubiquitin ligase-substrate adaptor activity	0/185	22/11755	1	1	0.989675		0

## Sheet: CC
ID	Description	GeneRatio	BgRatio	pvalue	p.adjust	qvalue	geneID	Count
GO:0044224	juxtaparanode region of axon	2/193	10/11884	0.0108373	1	1	KCNAB1/DLG2	2
GO:0042583	chromaffin granule	2/193	12/11884	0.0155595	1	1	ATP8A1/CLU	2
GO:0097440	apical dendrite	2/193	13/11884	0.0181941	1	1	CPEB3/CLU	2
GO:0000421	autophagosome membrane	3/193	37/11884	0.0218592	1	1	GABARAPL1/GABARAPL2/GABARAP	3
GO:0005774	vacuolar membrane	11/193	351/11884	0.0282029	1	1	UBXN6/VPS11/LMBRD1/SLC22A17/GABARAPL1/GABARAPL2/GABARAP/ATP8A1/CLN5/SCARB2/TRIM23	11
GO:0031307	integral component of mitochondrial outer membrane	2/193	17/11884	0.0304064	1	1	PINK1/ARMCX3	2
GO:0031306	intrinsic component of mitochondrial outer membrane	2/193	18/11884	0.0338478	1	1	PINK1/ARMCX3	2
GO:0005776	autophagosome	4/193	80/11884	0.0410637	1	1	VPS11/GABARAPL1/GABARAPL2/GABARAP	4
GO:0044304	main axon	3/193	55/11884	0.0598366	1	1	KCNAB1/SCN1B/DLG2	3
GO:0032592	integral component of mitochondrial membrane	3/193	60/11884	0.0736738	1	1	PINK1/ARMCX3/SLC25A4	3
GO:0098573	intrinsic component of mitochondrial membrane	3/193	62/11884	0.0795729	1	1	PINK1/ARMCX3/SLC25A4	3
GO:0097225	sperm midpiece	2/193	32/11884	0.0947934	1	1	PACRG/GABARAP	2
GO:0032838	plasma membrane bounded cell projection cytoplasm	5/193	152/11884	0.101705	1	1	PACRG/ARMCX3/GABARAP/DLG2/BBS1	5
GO:0014069	postsynaptic density	7/193	259/11884	0.129269	1	1	CPEB3/PJA2/MAGI2/MPDZ/CAMK1/DLG2/ADD1	7
GO:0001673	male germ cell nucleus	2/193	39/11884	0.131771	1	1	TERF2IP/ZBTB16	2
GO:0031201	SNARE complex	2/193	39/11884	0.131771	1	1	STX12/VAMP2	2
GO:0045334	clathrin-coated endocytic vesicle	3/193	79/11884	0.137076	1	1	LMBRD1/VAMP2/SCARB2	3
GO:0032279	asymmetric synapse	7/193	265/11884	0.140671	1	1	CPEB3/PJA2/MAGI2/MPDZ/CAMK1/DLG2/ADD1	7
GO:0005930	axoneme	3/193	80/11884	0.140817	1	1	PACRG/GABARAP/BBS1	3
GO:0036126	sperm flagellum	3/193	81/11884	0.144591	1	1	PACRG/GABARAP/NME5	3
GO:0097014	ciliary plasm	3/193	81/11884	0.144591	1	1	PACRG/GABARAP/BBS1	3
GO:0030014	CCR4-NOT complex	1/193	10/11884	0.151087	1	1	CPEB3	1
GO:0072687	meiotic spindle	1/193	10/11884	0.151087	1	1	RPS6KA2	1
GO:0031514	motile cilium	4/193	128/11884	0.154982	1	1	PACRG/GABARAP/NME5/BBS1	4
GO:0031301	integral component of organelle membrane	7/193	274/11884	0.158655	1	1	PINK1/CASD1/ARMCX3/SLC22A17/STX12/ITM2B/SLC25A4	7
GO:0099572	postsynaptic specialization	7/193	277/11884	0.164874	1	1	CPEB3/PJA2/MAGI2/MPDZ/CAMK1/DLG2/ADD1	7
GO:0000782	telomere cap complex	1/193	11/11884	0.164886	1	1	TERF2IP	1
GO:0000783	nuclear telomere cap complex	1/193	11/11884	0.164886	1	1	TERF2IP	1
GO:0042589	zymogen granule membrane	1/193	11/11884	0.164886	1	1	VAMP2	1
GO:0098845	postsynaptic endosome	1/193	11/11884	0.164886	1	1	STX12	1
GO:1990124	messenger ribonucleoprotein complex	1/193	11/11884	0.164886	1	1	CPEB3	1
GO:0031968	organelle outer membrane	5/193	179/11884	0.16652	1	1	PINK1/MOAP1/ARMCX3/SYNE1/PDE2A	5
GO:0019867	outer membrane	5/193	181/11884	0.171867	1	1	PINK1/MOAP1/ARMCX3/SYNE1/PDE2A	5
GO:0030672	synaptic vesicle membrane	3/193	88/11884	0.171897	1	1	STX12/VAMP2/PTPRN2	3
GO:0099501	exocytic vesicle membrane	3/193	88/11884	0.171897	1	1	STX12/VAMP2/PTPRN2	3
GO:0099568	cytoplasmic region	5/193	182/11884	0.174566	1	1	PACRG/ARMCX3/GABARAP/DLG2/BBS1	5
GO:0097729	9+2 motile cilium	3/193	89/11884	0.175913	1	1	PACRG/GABARAP/NME5	3
GO:0035102	PRC1 complex	1/193	12/11884	0.178461	1	1	CBX7	1
GO:0042599	lamellar body	1/193	12/11884	0.178461	1	1	SMPD1	1
GO:0140445	chromosome, telomeric repeat region	1/193	12/11884	0.178461	1	1	TERF2IP	1
GO:0098984	neuron to neuron synapse	7/193	284/11884	0.179802	1	1	CPEB3/PJA2/MAGI2/MPDZ/CAMK1/DLG2/ADD1	7
GO:0043073	germ cell nucleus	2/193	48/11884	0.18304	1	1	TERF2IP/ZBTB16	2
GO:0000139	Golgi membrane	11/193	497/11884	0.185415	1	1	APH1B/NDFIP1/RIC3/CASD1/STX12/GABARAPL2/GABARAP/PJA2/ITM2B/SCARB2/TRIM23	11
GO:1904115	axon cytoplasm	2/193	49/11884	0.188912	1	1	ARMCX3/DLG2	2
GO:1990531	phospholipid-translocating ATPase complex	1/193	13/11884	0.191816	1	1	ATP8A1	1
GO:0042588	zymogen granule	1/193	14/11884	0.204956	1	1	VAMP2	1
GO:0099059	integral component of presynaptic active zone membrane	1/193	14/11884	0.204956	1	1	GPM6A	1
GO:0031300	intrinsic component of organelle membrane	7/193	296/11884	0.206655	1	1	PINK1/CASD1/ARMCX3/SLC22A17/STX12/ITM2B/SLC25A4	7
GO:0060170	ciliary membrane	2/193	53/11884	0.212632	1	1	TXNDC15/BBS1	2
GO:0005879	axonemal microtubule	1/193	15/11884	0.217883	1	1	PACRG	1
GO:0071782	endoplasmic reticulum tubular network	1/193	15/11884	0.217883	1	1	REEP5	1
GO:0097449	astrocyte projection	1/193	15/11884	0.217883	1	1	PINK1	1
GO:0001518	voltage-gated sodium channel complex	1/193	16/11884	0.230601	1	1	SCN1B	1
GO:0033268	node of Ranvier	1/193	16/11884	0.230601	1	1	SCN1B	1
GO:0097038	perinuclear endoplasmic reticulum	1/193	16/11884	0.230601	1	1	CLU	1
GO:0098945	intrinsic component of presynaptic active zone membrane	1/193	16/11884	0.230601	1	1	GPM6A	1
GO:0005751	mitochondrial respiratory chain complex IV	1/193	17/11884	0.243113	1	1	COX7A1	1
GO:0044214	spanning component of plasma membrane	1/193	17/11884	0.243113	1	1	SLC4A4	1
GO:0045277	respiratory chain complex IV	1/193	17/11884	0.243113	1	1	COX7A1	1
GO:0005741	mitochondrial outer membrane	4/193	158/11884	0.255175	1	1	PINK1/MOAP1/ARMCX3/PDE2A	4
GO:0001725	stress fiber	2/193	61/11884	0.260743	1	1	LIMCH1/FAM107A	2
GO:0097517	contractile actin filament bundle	2/193	61/11884	0.260743	1	1	LIMCH1/FAM107A	2
GO:0031093	platelet alpha granule lumen	2/193	62/11884	0.266782	1	1	F8/CLU	2
GO:0016327	apicolateral plasma membrane	1/193	19/11884	0.267533	1	1	MPDZ	1
GO:0005765	lysosomal membrane	7/193	323/11884	0.271942	1	1	UBXN6/VPS11/LMBRD1/ATP8A1/CLN5/SCARB2/TRIM23	7
GO:0098852	lytic vacuole membrane	7/193	323/11884	0.271942	1	1	UBXN6/VPS11/LMBRD1/ATP8A1/CLN5/SCARB2/TRIM23	7
GO:0016234	inclusion body	2/193	63/11884	0.272821	1	1	PINK1/CLU	2
GO:0030669	clathrin-coated endocytic vesicle membrane	2/193	64/11884	0.278858	1	1	VAMP2/SCARB2	2
GO:0005773	vacuole	13/193	662/11884	0.279331	1	1	UBXN6/VPS11/LMBRD1/SLC22A17/GABARAPL1/GABARAPL2/GABARAP/ATP8A1/SMPD1/CTSO/CLN5/SCARB2/TRIM23	13
GO:0044295	axonal growth cone	1/193	20/11884	0.279448	1	1	GPM6A	1
GO:0010494	cytoplasmic stress granule	2/193	66/11884	0.290921	1	1	HABP4/CIRBP	2
GO:0034364	high-density lipoprotein particle	1/193	21/11884	0.291169	1	1	CLU	1
GO:0031902	late endosome membrane	3/193	116/11884	0.291486	1	1	UBXN6/VPS11/SCARB2	3
GO:0032432	actin filament bundle	2/193	67/11884	0.296944	1	1	LIMCH1/FAM107A	2
GO:0042641	actomyosin	2/193	67/11884	0.296944	1	1	LIMCH1/FAM107A	2
GO:0005640	nuclear outer membrane	1/193	22/11884	0.302701	1	1	SYNE1	1
GO:0046930	pore complex	1/193	22/11884	0.302701	1	1	SLC25A4	1
GO:0016528	sarcoplasm	2/193	69/11884	0.308966	1	1	HABP4/REEP5	2
GO:0030658	transport vesicle membrane	4/193	173/11884	0.309495	1	1	STX12/VAMP2/PTPRN2/CPE	4
GO:0030136	clathrin-coated vesicle	4/193	174/11884	0.313166	1	1	VPS11/LMBRD1/VAMP2/SCARB2	4
GO:0030285	integral component of synaptic vesicle membrane	1/193	23/11884	0.314047	1	1	STX12	1
GO:0089717	spanning component of membrane	1/193	23/11884	0.314047	1	1	SLC4A4	1
GO:0036019	endolysosome	1/193	24/11884	0.325208	1	1	SMPD1	1
GO:0098794	postsynapse	10/193	515/11884	0.32682	1	1	STX12/SYNE1/CPEB3/PJA2/MAGI2/MPDZ/CAMK1/GPM6A/DLG2/ADD1	10
GO:0120111	neuron projection cytoplasm	2/193	72/11884	0.326919	1	1	ARMCX3/DLG2	2
GO:0005790	smooth endoplasmic reticulum	1/193	25/11884	0.336189	1	1	GABARAP	1
GO:0034706	sodium channel complex	1/193	25/11884	0.336189	1	1	SCN1B	1
GO:0005811	lipid droplet	2/193	74/11884	0.33882	1	1	METTL7A/SMPD1	2
GO:0016607	nuclear speck	7/193	349/11884	0.339229	1	1	KLF15/HABP4/FAM107A/ZBTB16/MOCS2/CRY2/APBB1	7
GO:0048787	presynaptic active zone membrane	1/193	26/11884	0.346993	1	1	GPM6A	1
GO:0070069	cytochrome complex	1/193	26/11884	0.346993	1	1	COX7A1	1
GO:0036464	cytoplasmic ribonucleoprotein granule	4/193	185/11884	0.353745	1	1	EID1/SYNE1/HABP4/CIRBP	4
GO:0031519	PcG protein complex	1/193	27/11884	0.357621	1	1	CBX7	1
GO:0031234	extrinsic component of cytoplasmic side of plasma membrane	2/193	78/11884	0.362423	1	1	KCNAB1/GNG7	2
GO:0005834	heterotrimeric G-protein complex	1/193	28/11884	0.368077	1	1	GNG7	1
GO:0030426	growth cone	3/193	135/11884	0.375949	1	1	PINK1/GPM6A/APBB1	3
GO:0000407	phagophore assembly site	1/193	29/11884	0.378364	1	1	STX12	1
GO:0034358	plasma lipoprotein particle	1/193	29/11884	0.378364	1	1	CLU	1
GO:1990777	lipoprotein particle	1/193	29/11884	0.378364	1	1	CLU	1
GO:0031091	platelet alpha granule	2/193	81/11884	0.37992	1	1	F8/CLU	2
GO:0005759	mitochondrial matrix	7/193	365/11884	0.381752	1	1	ACSM5/ISCU/TK2/PDK4/PDE2A/IVD/BTD	7
GO:0030135	coated vesicle	5/193	254/11884	0.395998	1	1	VPS11/LMBRD1/VAMP2/F8/SCARB2	5
GO:0030427	site of polarized growth	3/193	140/11884	0.397962	1	1	PINK1/GPM6A/APBB1	3
GO:0035770	ribonucleoprotein granule	4/193	199/11884	0.405381	1	1	EID1/SYNE1/HABP4/CIRBP	4
GO:0005925	focal adhesion	7/193	374/11884	0.405794	1	1	DIXDC1/FAM107A/SORBS2/TNS1/FHL1/SCARB2/ADD1	7
GO:0032994	protein-lipid complex	1/193	32/11884	0.408236	1	1	CLU	1
GO:0033017	sarcoplasmic reticulum membrane	1/193	32/11884	0.408236	1	1	REEP5	1
GO:0043202	lysosomal lumen	2/193	87/11884	0.414282	1	1	SMPD1/SCARB2	2
GO:0097386	glial cell projection	1/193	33/11884	0.417872	1	1	PINK1	1
GO:0097546	ciliary base	1/193	33/11884	0.417872	1	1	MAGI2	1
GO:0098563	intrinsic component of synaptic vesicle membrane	1/193	33/11884	0.417872	1	1	STX12	1
GO:0005912	adherens junction	3/193	146/11884	0.424095	1	1	PTPRM/DLG2/ADD1	3
GO:0030055	cell-substrate junction	7/193	382/11884	0.427146	1	1	DIXDC1/FAM107A/SORBS2/TNS1/FHL1/SCARB2/ADD1	7
GO:0000152	nuclear ubiquitin ligase complex	1/193	34/11884	0.427352	1	1	CBX7	1
GO:0019005	SCF ubiquitin ligase complex	1/193	34/11884	0.427352	1	1	FBXL5	1
GO:1905360	GTPase complex	1/193	34/11884	0.427352	1	1	GNG7	1
GO:0005743	mitochondrial inner membrane	6/193	327/11884	0.439522	1	1	SLC25A42/PINK1/PDE2A/COX7A1/CLU/SLC25A4	6
GO:0005923	bicellular tight junction	2/193	93/11884	0.447679	1	1	MAGI2/MPDZ	2
GO:0005775	vacuolar lumen	3/193	152/11884	0.449835	1	1	SMPD1/CLN5/SCARB2	3
GO:0005770	late endosome	4/193	214/11884	0.459808	1	1	UBXN6/VPS11/MAGI2/SCARB2	4
GO:0030173	integral component of Golgi membrane	1/193	39/11884	0.472499	1	1	CASD1	1
GO:0070160	tight junction	2/193	98/11884	0.474684	1	1	MAGI2/MPDZ	2
GO:0048471	perinuclear region of cytoplasm	10/193	585/11884	0.480379	1	1	NDFIP1/PINK1/FBXL5/MAGI2/SORBS2/VAMP2/PTPRM/PDE2A/CLN5/CLU	10
GO:0099023	vesicle tethering complex	1/193	41/11884	0.489549	1	1	VPS11	1
GO:0008021	synaptic vesicle	3/193	163/11884	0.495754	1	1	STX12/VAMP2/PTPRN2	3
GO:0030660	Golgi-associated vesicle membrane	1/193	42/11884	0.497868	1	1	ITM2B	1
GO:0030017	sarcomere	3/193	165/11884	0.503901	1	1	SYNE1/HABP4/SORBS2	3
GO:0031228	intrinsic component of Golgi membrane	1/193	43/11884	0.506052	1	1	CASD1	1
GO:0044297	cell body	8/193	474/11884	0.506982	1	1	PACRG/DIXDC1/RIC3/PINK1/SORBS2/SCN1B/GPM6A/DLG2	8
GO:0150034	distal axon	4/193	228/11884	0.50903	1	1	DIXDC1/PINK1/GPM6A/APBB1	4
GO:0000323	lytic vacuole	10/193	599/11884	0.510751	1	1	UBXN6/VPS11/LMBRD1/GABARAP/ATP8A1/SMPD1/CTSO/CLN5/SCARB2/TRIM23	10
GO:0005764	lysosome	10/193	599/11884	0.510751	1	1	UBXN6/VPS11/LMBRD1/GABARAP/ATP8A1/SMPD1/CTSO/CLN5/SCARB2/TRIM23	10
GO:0030139	endocytic vesicle	5/193	291/11884	0.512908	1	1	VPS11/LMBRD1/STX12/VAMP2/SCARB2	5
GO:0015030	Cajal body	1/193	44/11884	0.514103	1	1	HABP4	1
GO:0030315	T-tubule	1/193	44/11884	0.514103	1	1	SCN1B	1
GO:0042175	nuclear outer membrane-endoplasmic reticulum membrane network	14/193	850/11884	0.518553	1	1	APH1B/RIC3/LMF1/SERINC1/LMBRD1/DHRS7/SYNE1/GABARAPL2/ARL6IP5/PJA2/REEP5/NR3C2/DNAJB9/SCARB2	14
GO:0043296	apical junction complex	2/193	107/11884	0.521229	1	1	MAGI2/MPDZ	2
GO:0035577	azurophil granule membrane	1/193	45/11884	0.522023	1	1	ATP8A1	1
GO:0010008	endosome membrane	7/193	419/11884	0.523993	1	1	APH1B/NDFIP1/UBXN6/VPS11/STX12/ITM2B/SCARB2	7
GO:0070382	exocytic vesicle	3/193	171/11884	0.52793	1	1	STX12/VAMP2/PTPRN2	3
GO:0030027	lamellipodium	3/193	172/11884	0.531873	1	1	SORBS2/PTPRM/APBB1	3
GO:0044306	neuron projection terminus	2/193	111/11884	0.541019	1	1	DIXDC1/VAMP2	2
GO:0014704	intercalated disc	1/193	48/11884	0.545022	1	1	SCN1B	1
GO:0030665	clathrin-coated vesicle membrane	2/193	115/11884	0.560238	1	1	VAMP2/SCARB2	2
GO:0019866	organelle inner membrane	6/193	371/11884	0.562282	1	1	SLC25A42/PINK1/PDE2A/COX7A1/CLU/SLC25A4	6
GO:0101003	ficolin-1-rich granule membrane	1/193	51/11884	0.56692	1	1	PTPRN2	1
GO:1904724	tertiary granule lumen	1/193	51/11884	0.56692	1	1	METTL7A	1
GO:0030667	secretory granule membrane	4/193	247/11884	0.572415	1	1	ATP8A1/VAMP2/PTPRN2/CPE	4
GO:0030016	myofibril	3/193	183/11884	0.573995	1	1	SYNE1/HABP4/SORBS2	3
GO:0036477	somatodendritic compartment	11/193	702/11884	0.593185	1	1	DIXDC1/NDFIP1/RIC3/CPEB3/MAGI2/MPDZ/SORBS2/SCN1B/GPM6A/DLG2/CLU	11
GO:0001917	photoreceptor inner segment	1/193	55/11884	0.594494	1	1	MAGI2	1
GO:0016323	basolateral plasma membrane	3/193	189/11884	0.595961	1	1	ABCA8/SLC4A4/DLG2	3
GO:0043204	perikaryon	2/193	123/11884	0.596941	1	1	SCN1B/DLG2	2
GO:0031966	mitochondrial membrane	8/193	514/11884	0.599829	1	1	SLC25A42/PINK1/MOAP1/ARMCX3/PDE2A/COX7A1/CLU/SLC25A4	8
GO:0005789	endoplasmic reticulum membrane	13/193	834/11884	0.602528	1	1	APH1B/RIC3/LMF1/SERINC1/LMBRD1/DHRS7/GABARAPL2/ARL6IP5/PJA2/REEP5/NR3C2/DNAJB9/SCARB2	13
GO:0043292	contractile fiber	3/193	191/11884	0.603119	1	1	SYNE1/HABP4/SORBS2	3
GO:0030424	axon	8/193	517/11884	0.606451	1	1	DIXDC1/PINK1/ARMCX3/KCNAB1/SCN1B/GPM6A/DLG2/APBB1	8
GO:0098827	endoplasmic reticulum subcompartment	13/193	837/11884	0.607808	1	1	APH1B/RIC3/LMF1/SERINC1/LMBRD1/DHRS7/GABARAPL2/ARL6IP5/PJA2/REEP5/NR3C2/DNAJB9/SCARB2	13
GO:0016529	sarcoplasmic reticulum	1/193	58/11884	0.614022	1	1	REEP5	1
GO:0035861	site of double-strand break	1/193	59/11884	0.620321	1	1	PHF1	1
GO:0098803	respiratory chain complex	1/193	59/11884	0.620321	1	1	COX7A1	1
GO:0042734	presynaptic membrane	2/193	129/11884	0.622939	1	1	PDE2A/GPM6A	2
GO:0005802	trans-Golgi network	3/193	197/11884	0.62409	1	1	NBEA/ATP8A1/VAMP2	3
GO:0008076	voltage-gated potassium channel complex	1/193	60/11884	0.626518	1	1	KCNAB1	1
GO:0017053	transcription repressor complex	1/193	60/11884	0.626518	1	1	ZBTB16	1
GO:0031594	neuromuscular junction	1/193	60/11884	0.626518	1	1	DLG2	1
GO:0030133	transport vesicle	5/193	332/11884	0.630355	1	1	APH1B/STX12/VAMP2/PTPRN2/CPE	5
GO:0015629	actin cytoskeleton	6/193	399/11884	0.633484	1	1	LIMCH1/GABARAP/FAM107A/SORBS2/ARHGAP6/ADD1	6
GO:0005746	mitochondrial respirasome	1/193	62/11884	0.638612	1	1	COX7A1	1
GO:0005911	cell-cell junction	6/193	402/11884	0.640706	1	1	MAGI2/MPDZ/SCN1B/PTPRM/DLG2/ADD1	6
GO:0033116	endoplasmic reticulum-Golgi intermediate compartment membrane	1/193	64/11884	0.650315	1	1	F8	1
GO:0098839	postsynaptic density membrane	1/193	64/11884	0.650315	1	1	DLG2	1
GO:0019897	extrinsic component of plasma membrane	2/193	137/11884	0.655571	1	1	KCNAB1/GNG7	2
GO:0005881	cytoplasmic microtubule	1/193	65/11884	0.656025	1	1	PACRG	1
GO:0048786	presynaptic active zone	1/193	65/11884	0.656025	1	1	GPM6A	1
GO:0070469	respirasome	1/193	66/11884	0.661642	1	1	COX7A1	1
GO:0009925	basal plasma membrane	3/193	210/11884	0.666896	1	1	ABCA8/SLC4A4/DLG2	3
GO:0005798	Golgi-associated vesicle	1/193	68/11884	0.672604	1	1	ITM2B	1
GO:0034705	potassium channel complex	1/193	68/11884	0.672604	1	1	KCNAB1	1
GO:0044291	cell-cell contact zone	1/193	68/11884	0.672604	1	1	SCN1B	1
GO:0009898	cytoplasmic side of plasma membrane	2/193	142/11884	0.674805	1	1	KCNAB1/GNG7	2
GO:0070820	tertiary granule	2/193	142/11884	0.674805	1	1	METTL7A/PTPRN2	2
GO:0043025	neuronal cell body	6/193	418/11884	0.677775	1	1	DIXDC1/RIC3/SORBS2/SCN1B/GPM6A/DLG2	6
GO:0005758	mitochondrial intermembrane space	1/193	69/11884	0.677951	1	1	PINK1	1
GO:0031901	early endosome membrane	2/193	143/11884	0.678545	1	1	UBXN6/STX12	2
GO:0005740	mitochondrial envelope	8/193	553/11884	0.681326	1	1	SLC25A42/PINK1/MOAP1/ARMCX3/PDE2A/COX7A1/CLU/SLC25A4	8
GO:0099056	integral component of presynaptic membrane	1/193	70/11884	0.683212	1	1	GPM6A	1
GO:0031252	cell leading edge	5/193	357/11884	0.692978	1	1	FAM107A/LDB2/SORBS2/PTPRM/APBB1	5
GO:0000785	chromatin	14/193	954/11884	0.693473	1	1	PINK1/CALCOCO1/PBXIP1/KLF15/WBP2/CBX7/TSPYL1/TEF/POU6F1/NAP1L2/NR3C2/HLF/CREBL2/KLF9	14
GO:0000932	P-body	1/193	73/11884	0.698487	1	1	SYNE1	1
GO:0001750	photoreceptor outer segment	1/193	73/11884	0.698487	1	1	MAGI2	1
GO:0098793	presynapse	6/193	429/11884	0.701802	1	1	DIXDC1/STX12/VAMP2/PTPRN2/PDE2A/GPM6A	6
GO:0045178	basal part of cell	3/193	223/11884	0.706066	1	1	ABCA8/SLC4A4/DLG2	3
GO:0055038	recycling endosome membrane	1/193	75/11884	0.708261	1	1	STX12	1
GO:0098889	intrinsic component of presynaptic membrane	1/193	75/11884	0.708261	1	1	GPM6A	1
GO:0005929	cilium	6/193	433/11884	0.710238	1	1	PACRG/TXNDC15/GABARAP/MAGI2/NME5/BBS1	6
GO:0035579	specific granule membrane	1/193	76/11884	0.713029	1	1	ATP8A1	1
GO:0030425	dendrite	7/193	504/11884	0.716302	1	1	NDFIP1/CPEB3/MAGI2/MPDZ/SORBS2/GPM6A/CLU	7
GO:0097447	dendritic tree	7/193	506/11884	0.720135	1	1	NDFIP1/CPEB3/MAGI2/MPDZ/SORBS2/GPM6A/CLU	7
GO:0030134	COPII-coated ER to Golgi transport vesicle	1/193	78/11884	0.722333	1	1	F8	1
GO:0031970	organelle envelope lumen	1/193	78/11884	0.722333	1	1	PINK1	1
GO:0034703	cation channel complex	2/193	157/11884	0.727319	1	1	KCNAB1/SCN1B	2
GO:0090734	site of DNA damage	1/193	81/11884	0.735731	1	1	PHF1	1
GO:0098562	cytoplasmic side of membrane	2/193	162/11884	0.743165	1	1	KCNAB1/GNG7	2
GO:0034451	centriolar satellite	1/193	83/11884	0.744303	1	1	BBS1	1
GO:0097060	synaptic membrane	4/193	311/11884	0.748055	1	1	SYNE1/PDE2A/GPM6A/DLG2	4
GO:0031965	nuclear membrane	3/193	240/11884	0.751876	1	1	SYNE1/HABP4/EDNRB	3
GO:0032587	ruffle membrane	1/193	87/11884	0.760626	1	1	FAM107A	1
GO:0099634	postsynaptic specialization membrane	1/193	87/11884	0.760626	1	1	DLG2	1
GO:0030662	coated vesicle membrane	2/193	168/11884	0.761138	1	1	VAMP2/SCARB2	2
GO:0030666	endocytic vesicle membrane	2/193	168/11884	0.761138	1	1	VAMP2/SCARB2	2
GO:0005796	Golgi lumen	1/193	89/11884	0.768395	1	1	F8	1
GO:0019898	extrinsic component of membrane	3/193	247/11884	0.769011	1	1	UBXN6/KCNAB1/GNG7	3
GO:0097733	photoreceptor cell cilium	1/193	90/11884	0.772185	1	1	MAGI2	1
GO:0005874	microtubule	4/193	323/11884	0.774006	1	1	PACRG/PBXIP1/GABARAPL1/GABARAP	4
GO:0016604	nuclear body	9/193	675/11884	0.774567	1	1	TERF2IP/KLF15/HABP4/FAM107A/ZBTB16/MOCS2/CRY2/APBB1/ADD1	9
GO:0030175	filopodium	1/193	91/11884	0.775913	1	1	GPM6A	1
GO:0016605	PML body	1/193	93/11884	0.783188	1	1	ZBTB16	1
GO:0005884	actin filament	1/193	94/11884	0.786736	1	1	ARHGAP6	1
GO:0097731	9+0 non-motile cilium	1/193	95/11884	0.790228	1	1	MAGI2	1
GO:0005788	endoplasmic reticulum lumen	3/193	259/11884	0.796145	1	1	DNAJB9/F8/CLU	3
GO:0043679	axon terminus	1/193	97/11884	0.79704	1	1	DIXDC1	1
GO:0072562	blood microparticle	1/193	99/11884	0.803632	1	1	CLU	1
GO:0005793	endoplasmic reticulum-Golgi intermediate compartment	1/193	103/11884	0.816185	1	1	F8	1
GO:0005814	centriole	1/193	104/11884	0.819196	1	1	MAGI2	1
GO:0044815	DNA packaging complex	1/193	104/11884	0.819196	1	1	TERF2IP	1
GO:0030659	cytoplasmic vesicle membrane	12/193	923/11884	0.82737	1	1	APH1B/NDFIP1/UBXN6/VPS11/GABARAPL1/STX12/ATP8A1/ITM2B/VAMP2/PTPRN2/CPE/SCARB2	12
GO:0098800	inner mitochondrial membrane protein complex	1/193	107/11884	0.827939	1	1	COX7A1	1
GO:0030018	Z disc	1/193	108/11884	0.830759	1	1	SORBS2	1
GO:0098791	Golgi apparatus subcompartment	3/193	280/11884	0.837244	1	1	NBEA/ATP8A1/VAMP2	3
GO:0031461	cullin-RING ubiquitin ligase complex	1/193	112/11884	0.841585	1	1	FBXL5	1
GO:0005768	endosome	10/193	799/11884	0.843862	1	1	APH1B/NDFIP1/UBXN6/VPS11/STX12/MAGI2/ITM2B/SMPD1/S1PR1/SCARB2	10
GO:0097730	non-motile cilium	1/193	113/11884	0.844182	1	1	MAGI2	1
GO:0031253	cell projection membrane	3/193	284/11884	0.844213	1	1	TXNDC15/FAM107A/BBS1	3
GO:0012506	vesicle membrane	12/193	941/11884	0.846108	1	1	APH1B/NDFIP1/UBXN6/VPS11/GABARAPL1/STX12/ATP8A1/ITM2B/VAMP2/PTPRN2/CPE/SCARB2	12
GO:0042383	sarcolemma	1/193	116/11884	0.851722	1	1	SCN1B	1
GO:0045111	intermediate filament cytoskeleton	1/193	116/11884	0.851722	1	1	PJA2	1
GO:0098798	mitochondrial protein-containing complex	2/193	207/11884	0.853395	1	1	COX7A1/SLC25A4	2
GO:0031674	I band	1/193	117/11884	0.854154	1	1	SORBS2	1
GO:0045335	phagocytic vesicle	1/193	117/11884	0.854154	1	1	STX12	1
GO:0000151	ubiquitin ligase complex	2/193	208/11884	0.855268	1	1	FBXL5/CBX7	2
GO:0045121	membrane raft	3/193	291/11884	0.855792	1	1	STX12/EDNRB/S1PR1	3
GO:0098857	membrane microdomain	3/193	292/11884	0.857384	1	1	STX12/EDNRB/S1PR1	3
GO:0005875	microtubule associated complex	1/193	121/11884	0.863491	1	1	GABARAP	1
GO:0045211	postsynaptic membrane	2/193	215/11884	0.867777	1	1	SYNE1/DLG2	2
GO:1990351	transporter complex	3/193	299/11884	0.868104	1	1	ATP8A1/KCNAB1/SCN1B	3
GO:0034702	ion channel complex	2/193	216/11884	0.869481	1	1	KCNAB1/SCN1B	2
GO:0005766	primary lysosome	1/193	128/11884	0.878422	1	1	ATP8A1	1
GO:0042582	azurophil granule	1/193	128/11884	0.878422	1	1	ATP8A1	1
GO:0099512	supramolecular fiber	8/193	691/11884	0.880014	1	1	PACRG/PBXIP1/GABARAPL1/SYNE1/HABP4/GABARAP/SORBS2/ARHGAP6	8
GO:0000781	chromosome, telomeric region	1/193	130/11884	0.882381	1	1	TERF2IP	1
GO:0031967	organelle envelope	11/193	915/11884	0.886277	1	1	SLC25A42/PINK1/MOAP1/ARMCX3/SYNE1/HABP4/PDE2A/EDNRB/COX7A1/CLU/SLC25A4	11
GO:0031975	envelope	11/193	915/11884	0.886277	1	1	SLC25A42/PINK1/MOAP1/ARMCX3/SYNE1/HABP4/PDE2A/EDNRB/COX7A1/CLU/SLC25A4	11
GO:0099081	supramolecular polymer	8/193	699/11884	0.887449	1	1	PACRG/PBXIP1/GABARAPL1/SYNE1/HABP4/GABARAP/SORBS2/ARHGAP6	8
GO:0099699	integral component of synaptic membrane	1/193	133/11884	0.888081	1	1	GPM6A	1
GO:0030141	secretory granule	8/193	707/11884	0.894502	1	1	METTL7A/ATP8A1/VAMP2/SMPD1/PTPRN2/F8/CPE/CLU	8
GO:0042581	specific granule	1/193	139/11884	0.898669	1	1	ATP8A1	1
GO:0005769	early endosome	3/193	325/11884	0.901971	1	1	UBXN6/VPS11/STX12	3
GO:0099240	intrinsic component of synaptic membrane	1/193	142/11884	0.903583	1	1	GPM6A	1
GO:0099513	polymeric cytoskeletal fiber	5/193	497/11884	0.910912	1	1	PACRG/PBXIP1/GABARAPL1/GABARAP/ARHGAP6	5
GO:0005667	transcription regulator complex	4/193	420/11884	0.914083	1	1	PBXIP1/LDB2/ZBTB16/HLF	4
GO:0043197	dendritic spine	1/193	149/11884	0.914147	1	1	GPM6A	1
GO:0044309	neuron spine	1/193	150/11884	0.915559	1	1	GPM6A	1
GO:0001726	ruffle	1/193	153/11884	0.919658	1	1	FAM107A	1
GO:0005681	spliceosomal complex	1/193	153/11884	0.919658	1	1	CIRBP	1
GO:0031256	leading edge membrane	1/193	154/11884	0.92098	1	1	FAM107A	1
GO:0043235	receptor complex	3/193	346/11884	0.923396	1	1	PTPRN2/NR3C2/LIFR	3
GO:0032993	protein-DNA complex	1/193	157/11884	0.924817	1	1	TERF2IP	1
GO:0055037	recycling endosome	1/193	157/11884	0.924817	1	1	STX12	1
GO:0030496	midbody	1/193	161/11884	0.929646	1	1	CPEB3	1
GO:0099503	secretory vesicle	9/193	832/11884	0.93032	1	1	METTL7A/STX12/ATP8A1/VAMP2/SMPD1/PTPRN2/F8/CPE/CLU	9
GO:0101002	ficolin-1-rich granule	1/193	166/11884	0.93525	1	1	PTPRN2	1
GO:0098978	glutamatergic synapse	2/193	270/11884	0.936462	1	1	CAMK1/GPM6A	2
GO:1902495	transmembrane transporter complex	2/193	274/11884	0.939842	1	1	KCNAB1/SCN1B	2
GO:0098796	membrane protein complex	10/193	925/11884	0.93993	1	1	APH1B/VPS11/STX12/SYNE1/KCNAB1/VAMP2/SCN1B/GNG7/COX7A1/SLC25A4	10
GO:0098858	actin-based cell projection	1/193	171/11884	0.940411	1	1	GPM6A	1
GO:0000228	nuclear chromosome	1/193	175/11884	0.944243	1	1	TERF2IP	1
GO:0098797	plasma membrane protein complex	4/193	469/11884	0.949851	1	1	APH1B/KCNAB1/SCN1B/GNG7	4
GO:0034774	secretory granule lumen	2/193	290/11884	0.951737	1	1	F8/CLU	2
GO:0005635	nuclear envelope	3/193	386/11884	0.952833	1	1	SYNE1/HABP4/EDNRB	3
GO:0060205	cytoplasmic vesicle lumen	2/193	293/11884	0.953703	1	1	F8/CLU	2
GO:0031983	vesicle lumen	2/193	295/11884	0.954971	1	1	F8/CLU	2
GO:0099080	supramolecular complex	10/193	965/11884	0.957058	1	1	PACRG/PBXIP1/EID1/GABARAPL1/SYNE1/HABP4/GABARAP/SORBS2/CIRBP/ARHGAP6	10
GO:0016324	apical plasma membrane	2/193	299/11884	0.957409	1	1	MPDZ/SORBS2	2
GO:0098552	side of membrane	4/193	507/11884	0.967585	1	1	KCNAB1/LIFR/GNG7/S1PR1	4
GO:0090575	RNA polymerase II transcription regulator complex	1/193	213/11884	0.970381	1	1	HLF	1
GO:0009897	external side of plasma membrane	2/193	332/11884	0.973235	1	1	LIFR/S1PR1	2
GO:0015630	microtubule cytoskeleton	9/193	970/11884	0.979811	1	1	PACRG/UBXN6/PBXIP1/GABARAPL1/GABARAP/MAGI2/RPS6KA2/PHF1/BBS1	9
GO:0045177	apical part of cell	2/193	355/11884	0.980738	1	1	MPDZ/SORBS2	2
GO:0062023	collagen-containing extracellular matrix	2/193	356/11884	0.981013	1	1	CRELD1/CLU	2
GO:0009986	cell surface	6/193	741/11884	0.983414	1	1	TMEM8B/SLC4A4/TNS1/LIFR/S1PR1/CLU	6
GO:0005938	cell cortex	1/193	248/11884	0.98349	1	1	NDFIP1	1
GO:0005815	microtubule organizing center	4/193	604/11884	0.99001	1	1	UBXN6/MAGI2/PHF1/BBS1	4
GO:1990904	ribonucleoprotein complex	3/193	539/11884	0.993611	1	1	CPEB3/SECISBP2L/CIRBP	3
GO:0098687	chromosomal region	1/193	305/11884	0.993651	1	1	TERF2IP	1
GO:0140535	intracellular protein-containing complex	4/193	656/11884	0.994852	1	1	FBXL5/CBX7/CPEB3/MOCS2	4
GO:0030312	external encapsulating structure	2/193	453/11884	0.995442	1	1	CRELD1/CLU	2
GO:0031012	extracellular matrix	2/193	453/11884	0.995442	1	1	CRELD1/CLU	2
GO:0005730	nucleolus	5/193	765/11884	0.995621	1	1	SYNE1/HABP4/LDB2/TSPYL1/DNAJB9	5
GO:0005819	spindle	1/193	332/11884	0.995969	1	1	RPS6KA2	1
GO:0005813	centrosome	2/193	474/11884	0.996677	1	1	PHF1/BBS1	2
GO:1990234	transferase complex	2/193	624/11884	0.999672	1	1	FBXL5/CBX7	2
GO:0005643	nuclear pore	0/193	80/11884	1	1	1		0
GO:0005682	U5 snRNP	0/193	17/11884	1	1	1		0
GO:0005684	U2-type spliceosomal complex	0/193	75/11884	1	1	1		0
GO:0005685	U1 snRNP	0/193	16/11884	1	1	1		0
GO:0005686	U2 snRNP	0/193	21/11884	1	1	1		0
GO:0005801	cis-Golgi network	0/193	45/11884	1	1	1		0
GO:0005902	microvillus	0/193	73/11884	1	1	1		0
GO:0016459	myosin complex	0/193	42/11884	1	1	1		0
GO:0030532	small nuclear ribonucleoprotein complex	0/193	61/11884	1	1	1		0
GO:0031089	platelet dense granule lumen	0/193	13/11884	1	1	1		0
GO:0031225	anchored component of membrane	0/193	113/11884	1	1	1		0
GO:0031227	intrinsic component of endoplasmic reticulum membrane	0/193	123/11884	1	1	1		0
GO:0031233	intrinsic component of external side of plasma membrane	0/193	18/11884	1	1	1		0
GO:0031362	anchored component of external side of plasma membrane	0/193	14/11884	1	1	1		0
GO:0032045	guanyl-nucleotide exchange factor complex	0/193	11/11884	1	1	1		0
GO:0032420	stereocilium	0/193	32/11884	1	1	1		0
GO:0032421	stereocilium bundle	0/193	36/11884	1	1	1		0
GO:0032433	filopodium tip	0/193	16/11884	1	1	1		0
GO:0036064	ciliary basal body	0/193	100/11884	1	1	1		0
GO:0042827	platelet dense granule	0/193	20/11884	1	1	1		0
GO:0046540	U4/U6 x U5 tri-snRNP complex	0/193	32/11884	1	1	1		0
GO:0046658	anchored component of plasma membrane	0/193	42/11884	1	1	1		0
GO:0061695	transferase complex, transferring phosphorus-containing groups	0/193	236/11884	1	1	1		0
GO:0071004	U2-type prespliceosome	0/193	14/11884	1	1	1		0
GO:0071010	prespliceosome	0/193	14/11884	1	1	1		0
GO:0071013	catalytic step 2 spliceosome	0/193	70/11884	1	1	1		0
GO:0097525	spliceosomal snRNP complex	0/193	55/11884	1	1	1		0
GO:0097526	spliceosomal tri-snRNP complex	0/193	32/11884	1	1	1		0
GO:0098862	cluster of actin-based cell projections	0/193	120/11884	1	1	1		0
GO:0120114	Sm-like protein family complex	0/193	68/11884	1	1	1		0
